# Supplementary material for: Modeling the relative response factor of small molecules in positive electrospray ionization
Source: Royal Society of Chemistry journal article supplement (doi:10.1039/d4ra06695b), 2024-01-01
Supplement: d4ra06695b1.xlsx [file d4ra06695b1.xlsx]

## Sheet: MS-Dial params
	MS Dial parameters		Comments
Data Collection
Mass accuracy
MS1 tolerance	0.01	Da
MS2 tolerance	0.025	Da
Peak detection
Peak detection parameters
Minimum peak height	3000	amplitude
Mass slice width	0.1	Da
MS2Dec
Deconvolution parameters
Sigma window value	0.5		not relevant for our study since we did not use MS/MS spectra
MS/MS abundance cut off	0	amplitude
Identification
MSP file	None
Retention time tolerance	100	min	not relevant
Accurate mass tolerance (MS1)	0.01	Da
Accurate mass tolerance (MS2)	0.05	Da	not relevant
Identification score cut off	70	%	not relevant
Adduct
Molecular species
[M+H]+ (positive ESI)
[M-H]- (negative ESI)
Alignment
Retention time tolerance	0.1	min
MS1 tolerance	0.0031	Da	equals to 10 ppm

## Sheet: model 1
Chemical name	Chem	LJ p1	LJ p2	LJ p3	LJ std	Coul p1	Coul p2	Coul p3	Coul std	W LJ p2	W LJ p3	W LJ std	RT	Param penalty	Charge penalty	Total	DTXSID	SMILES	log Kma	log Kaw	logKow	logKmw	logKam	logKaw	VP	Sw	logD5	Native Charge	log RRF	H LJ	W LJ	LJ	H Coul	SW	const	calc log RRF	AE	MAE	R2			coef
4-(3-Phenylpropyl)pyridine	43PP	-3.24298	-2.07349	-2.22881	0.427673	-3.06968	145.729	121.707	60.3382	-20.0894	-9.87059	7.65158	10.952	0	0	0	DTXSID5044869	C(CC1=CC=CC=C1)CC1=CC=NC=C1	7.91	-4.65	3.61	3.57	-7.91	-4.54	0.0027234	6.68e-06	2.87	1	2.58	0.503641	0.471105	0.974747	-0.78481	9.09816e-07	2.5141	2.70404	0.124038	0.131002	0.820065		const	2.5141
4-Acetylaminophenylacetic acid	ACT	-3.28125	-2.08457	-2.27008	0.457439	-153.701	19.2334	-10.8744	78.059	-40.7907	-21.8914	12.5278	1.912	0	0	0	DTXSID0020020	CC(=O)NC1=CC=C(CC(O)=O)C=C1	13.06	-12.61	0.32	1.21	-13.06	-12.26	2.16e-06	0.00185273	1.08	-1	1.89	0.444512	0.259264	0.703777	-1.13674	0.000252342	2.5141	2.08139	0.191391				LJ p1	0.6341
Cinchophen	CIN	-3.54691	-2.19092	-2.40933	0.531233	-127.006	45.3061	10.2474	95.2556	-13.3274	-0.9885	8.50478	15.657	0.5	0.2	0.7	DTXSID0040705	OC(=O)C1=C2C=CC=CC2=NC(=C1)C1=CC=CC=C1	12.15	-8.69	3.95	4.03	-12.15	-8.52	3.5e-09	0.000641245	3.42	-1	1.73	0.465825	0.416544	0.882369	-1.65714	8.73376e-05	2.5141	1.73941	0.00941156				LJ p2	-5.8029
N-Ethyl-4-menthane-3-carboxamide	NEM	-2.60657	-1.66901	-1.8107	0.341423	24.2772	158.986	135.431	52.0174	-25.2629	-13.3666	9.47849	10.645	0.6	0.519	1.119	DTXSID5047039	CCNC(=O)C1CC(C)CCC1C(C)C	8.14	-3.76	4.72	4.92	-8.14	-3.43	0.000943903	0.00414768	2.44	0	3.03	0.315862	0.732417	1.04828	-0.569466	0.000564914	2.5141	2.99348	0.0365222				LJ p3	4.9202
N,N'-Dibutylthiourea	NND	-3.21176	-2.08737	-2.2914	0.447813	58.0607	270.733	238.878	84.8314	-36.0218	-20.4694	10.7804	8.105	1	0.6	1.6	DTXSID8042187	CCCCNC(=S)NCCCC	8.35	-6.24	2.41	2.61	-8.35	-6.01	0.0386665	0.043122	1.69	0	1.88	0.366342	0.356224	0.722566	-1.13913	0.00587322	2.5141	2.10341	0.223413				LJ std	3.4931
Diuron	DIU	-3.45836	-2.03753	-2.25934	0.500538	-133.36	53.6558	19.6381	78.227	-33.0375	-20.2481	9.11199	8.425	1	0.6	1.6	DTXSID0020446	CN(C)C(=O)NC1=CC(Cl)=C(Cl)C=C1	10.54	-8.15	2.4	2.56	-10.54	-8.14	6.92e-08	0.000173803	2.68	0	2.52	0.262679	0.346703	0.609383	-0.964283	2.3672e-05	2.5141	2.15922	0.360777				Coul p1	-0.0058
4-Chlorophenylurea	4CHL	-2.83136	-1.71348	-1.89099	0.393588	-128.57	66.6197	35.1217	85.2973	-25.4318	-11.0802	9.89136	5.953	1	0.6	1.6	DTXSID5041512	NC(=O)NC1=CC=C(Cl)C=C1	9.88	-8.41	1.44	1.87	-9.88	-8.3	3.65e-05	0.0106003	1.8	0	1.88	0.218586	0.385933	0.604519	-1.24665	0.00144376	2.5141	1.87341	0.00659189				Coul p2	0.0314
N-Butyl-p-toluenesulfonamide	NBPT	-3.34659	-1.99016	-2.18417	0.49271	-161.476	28.6812	-7.9777	88.8981	-29.1874	-18.1149	8.16034	8.775	0.9	0.766	1.666	DTXSID7042198	CCCCNS(=O)(=O)C1=CC=C(C)C=C1	9.06	-7.01	2.35	2.64	-9.06	-6.71	9.18e-07	0.00669955	2.51	0	2.45	0.401165	0.390726	0.791891	-1.27372	0.000912479	2.5141	2.03318	0.416817				Coul p3	-0.0257
Laurocapram	LAU	-3.96008	-2.70012	-2.86276	0.468695	27.6507	264.524	232.133	86.6178	-16.2986	-7.98175	6.47953	16.89	0.9	1.1	2	DTXSID0042086	CCCCCCCCCCCCN1CCCCCC1=O	10.32	-4.1	6.48	6.12	-10.32	-4.15	7.06e-06	0.000303456	5.73	0	2.6	0.709251	0.473382	1.18263	-1.05099	4.13307e-05	2.5141	2.64579	0.0457873				Coul std	-0.0373
N-Phenyldiethanolamine	NNP	-0.456924	-0.006627	-0.017877	0.0807382	-71.3764	0.726161	0.157415	11.9904	-28.2707	-12.0279	11.246	5.6	4	3.4	7.4	DTXSID5021962	OCCN(CCO)C1=CC=CC=C1	11.15	-11.02	0.24	0.87	-11.15	-10.7	4.46e-05	0.184424	0.97	0	2.87	-0.0572116	0.460017	0.402806	-0.0145012	0.0251185	2.5141	2.92752	0.0575231				W LJ p2	0.21
Diphenylacetonitrile	DACN	-3.46023	-2.02401	-2.26743	0.491691	-103.881	38.0224	18.3374	56.7663	-32.2824	-21.7459	8.18723	7.481	4	7.7	11.7	DTXSID4020539	N#CC(C1=CC=CC=C1)C1=CC=CC=C1	8.48	-6.39	2.55	3.08	-8.48	-5.83	0.000198568	0.00111939	3	0	1.97	0.112324	0.476875	0.589199	-0.792235	0.000152461	2.5141	2.31122	0.341216				W LJ p3	-0.2001
N-(2,4-Dimethylphenyl)acetamide	NMD	-2.96463	-1.874	-2.03836	0.411927	-119.907	61.6689	30.1895	75.1832	-36.706	-24.2338	9.09945	6.083	0	27.149	27.149	DTXSID0044868	CC(=O)NC1=CC=C(C)C=C1C	8.37	-6.97	1.52	1.89	-8.37	-6.75	3.11e-06	0.019369	1.47	0	2.83	0.404488	0.369423	0.773911	-0.94834	0.00263806	2.5141	2.34231	0.487691				W LJ std	0.3548
Nuarimol	NUA	-4.78088	-2.83275	-3.11032	0.664611	-175.432	22.7551	-12.1282	85.7089	-29.4372	-14.5629	10.4778	9.455	8	29.7	37.7	DTXSID2042220	OC(C1=CC=C(F)C=C1)(C1=CN=CN=C1)C1=CC=CC=C1Cl	12.96	-10.91	2.75	3.33	-12.96	-10.27	3.37e-09	8.29e-05	3.18	0	2.26	0.424767	0.449736	0.874503	-1.15323	1.1291e-05	2.5141	2.23538	0.024616				Sw	0.1362
Dibutyl phthalate	DBP	-3.55203	-2.38291	-2.60214	0.414903	-91.797	109.828	76.039	73.017	-11.7685	-4.86631	6.11992	19.511	45	0.5	45.5	DTXSID2021781	CCCCOC(=O)C1=CC=CC=C1C(=O)OCCCC	9.61	-5.35	4.53	4.44	-9.61	-5.26	2.02e-05	4.01e-05	4.61	0	2.6	0.221708	0.673706	0.895414	-0.696709	5.46162e-06	2.5141	2.71281	0.11281
Diisobutyl phthalate	DIP	-3.39122	-2.29522	-2.42039	0.424875	-96.9415	91.5221	60.3544	78.9401	-11.4801	-3.93684	6.08924	19.511	45	0.5	45.5	DTXSID9022522	CC(C)COC(=O)C1=C(C=CC=C1)C(=O)OCC(C)C	9.03	-4.48	4.94	4.82	-9.03	-4.34	3.72e-05	2.22e-05	4.11	0	2.6	0.743893	0.537398	1.28129	-1.05952	3.02364e-06	2.5141	2.73587	0.135874				x	y
Dicyclohexyl phthalate	DCP	-3.98669	-2.54607	-2.7839	0.534348	-10.5503	172.976	137.214	80.4413	-28.5586	-17.7397	8.08349	11.739	45	0.8	45.8	DTXSID5025021	O=C(OC1CCCCC1)C1=C(C=CC=C1)C(=O)OC1CCCCC1	11.87	-6.59	5.75	5.5	-11.87	-6.53	8.7e-07	1.2e-05	5.83	0	2.14	0.415781	0.420436	0.836216	-1.03421	1.6344e-06	2.5141	2.31611	0.176107				1	1
Cladribine	CLA	-3.37826	-2.21368	-2.39425	0.42711	-179.996	37.3568	3.03414	99.9986	-43.5838	-21.9903	14.6075	3.77	20	30.6	50.6	DTXSID8022828	NC1=NC(Cl)=NC2=C1N=CN2[C@H]1C[C@H](O)[C@@H](CO)O1	17.48	-19.6	-1.95	-1.35	-17.48	-19.46	3.91e-10	0.0218731	-0.02	0	1.86	0.41541	0.430409	0.845819	-1.59094	0.00297912	2.5141	1.77196	0.0880444				4	4
Warfarin	WAR	-4.35527	-2.95675	-3.25215	0.664767	-297.898	-61.7677	-111.558	108.462	-49.065	-32.5962	12.9086	6.168	30	22.5	52.5	DTXSID5023742	CC(=O)CC(C1=CC=CC=C1)C1=C(O)C2=CC=CC=C2OC1=O	15.07	-13.12	2.29	2.4	-15.07	-13.04	1.15e-07	9.62e-05	2.7	0	2.4	0.716902	0.798827	1.51573	-1.39031	1.31024e-05	2.5141	2.63953	0.23953
Deethylatrazine	DEE	-2.57574	-1.63635	-1.80638	0.378107	-28.9487	87.6779	66.902	49.2695	-32.2737	-20.6503	7.91497	5.607	22	32.4	54.4	DTXSID5037494	CC(C)NC1=NC(Cl)=NC(N)=N1	8.78	-8.55	0.46	0.91	-8.78	-8.26	6.17e-09	0.00571496	1.49	0	2.21	0.295311	0.162876	0.458187	-0.636143	0.000778378	2.5141	2.33692	0.126922				1	2
4-Aminoazobenzene	4AMI	-3.55332	-2.12077	-2.46364	0.594001	16.7211	149.268	126.384	62.7085	-29.1048	-17.3426	9.07472	9.147	0	59.7	59.7	DTXSID6024460	NC1=CC=C(C=C1)N=NC1=CC=CC=C1	9.88	-7	2.86	2.86	-9.88	-7.1	1.41e-06	0.000162574	3.41	0	2.13	0.0067634	0.577955	0.584719	-0.997075	2.21426e-05	2.5141	2.10177	0.0282341				4	5
Dipropyl 2,5-pyridinedicarboxylate	DPPL	-3.13945	-2.10393	-2.24475	0.397087	-223.768	16.6598	-23.12	82.3688	-28.4025	-16.7159	8.0929	10.373	45	25	70	DTXSID8032544	CCCOC(=O)C1=CC=C(N=C1)C(=O)OCCC	8.92	-5.73	3.37	3.42	-8.92	-5.61	2.12e-05	0.00276899	3.22	0	2.78	0.56061	0.251704	0.812313	-0.657198	0.000377136	2.5141	2.66959	0.110408
Sulfamethazine	SUL	-3.73178	-2.31017	-2.47765	0.440205	-212.074	37.1091	-6.08981	90.4758	-53.3992	-37.8955	11.7311	4.055	60	13.7	73.7	DTXSID6021290	CC1=CC(C)=NC(NS(=O)(=O)C2=CC=C(N)C=C2)=N1	14.47	-14.69	0.29	1.08	-14.47	-14.1	8.56e-10	0.00431954	0.19	0	2.61	0.386499	0.531265	0.917765	-0.822983	0.000588321	2.5141	2.60947	0.000530268				1	0
Pyrimethamine	PYRA	-3.76982	-2.48428	-2.70934	0.495674	87.4885	237.597	208.584	69.0459	-38.1613	-22.1267	12.0511	8.267	56.6	20.475	77.075	DTXSID9021217	CCC1=NC(N)=NC(N)=C1C1=CC=C(Cl)C=C1	12.15	-11.3	1.75	2.66	-12.15	-10.39	1.32e-08	0.000394892	1.44	1	3	0.426554	0.689408	1.11596	-0.982917	5.37843e-05	2.5141	2.6472	0.352801				4	3
Fluazifop-butyl	FLZ	-4.67256	-3.27531	-3.49302	0.531297	-186.993	11.9823	-28.6363	81.8973	-26.6721	-14.9339	8.23996	13.933	45	36.672	81.672	DTXSID3034612	CCCCOC(=O)C(C)OC1=CC=C(OC2=CC=C(C=N2)C(F)(F)F)C=C1	11.27	-7.34	4.62	4.59	-11.27	-7.02	4.12e-07	2.76e-06	4.5	0	2.79	0.712936	0.310663	1.0236	-0.858013	3.75912e-07	2.5141	2.67969	0.110314
Ilepatril	ILE	-4.36299	-2.96203	-3.17368	0.570824	-460.716	3.85142	-69.4297	169.501	-50.1728	-28.5213	15.0769	7.283	61	20.8	81.8	DTXSID7047356	CC(C)[C@H](SC(C)=O)C(=O)N[C@H]1CC2=C(C=CC=C2)[C@H]2CCC[C@H](N2C1=O)C(O)=O	21.1	-19.29	2.66	3.36	-21.1	-18.6	3.49e-10	0.00257684	1.07	-1	2.04	0.800604	0.520085	1.32069	-1.74494	0.000350966	2.5141	2.0902	0.0502042
Caffeine	CAF	-2.55202	-1.47673	-1.70342	0.425109	-201.376	-16.463	-47.9279	71.5165	-42.2426	-25.3746	11.6585	4.091	47.5	35.3	82.8	DTXSID0020232	CN1C=NC2=C1C(=O)N(C)C(=O)N2C	9.58	-9.44	0	0.08	-9.58	-9.59	2.06e-06	0.111749	-0.07	0	1.87	0.0548411	0.342926	0.397767	-0.784778	0.0152202	2.5141	2.14231	0.272309
Boscalid	BOS	-4.33707	-2.72118	-2.91432	0.51589	-142.328	45.4913	11.2805	85.0208	-32.6366	-21.4258	8.40299	9.802	55	28.7	83.7	DTXSID6034392	ClC1=CC=C(C=C1)C1=C(NC(=O)C2=C(Cl)N=CC=C2)C=CC=C1	13.91	-9.65	5.11	5.36	-13.91	-9.16	1.17e-09	1.06e-05	2.96	0	2.2	0.5036	0.415003	0.918603	-1.20726	1.44372e-06	2.5141	2.22545	0.0254469
CP-457920	CP4	-3.89772	-2.49621	-2.73558	0.569947	-32.278	170.633	121.391	94.3348	-36.9156	-17.5731	13.578	9.097	45	50.8	95.8	DTXSID4047254	CCOC1=NC2=C(NC=C(C(=O)NCC3=CC=CC=C3)C2=O)C=C1	17.26	-15.73	1.97	2.12	-17.26	-15.66	4.7e-07	2.08e-05	1.12	0	2.45	0.545028	0.581578	1.12661	-1.09336	2.83296e-06	2.5141	2.54735	0.0973482
Azoxystrobin	AZO	-4.77726	-3.48136	-3.67954	0.569998	-206.4	19.927	-31.7705	98.2671	-44.092	-28.8249	11.4304	9.387	79	32.6	111.6	DTXSID0032520	CO\C=C(\C(=O)OC)C1=CC=CC=C1OC1=CC(OC2=CC=CC=C2C#N)=NC=N1	16.05	-14.56	2.55	2.92	-16.05	-13.91	8.33e-13	1.57e-05	2.5	0	3.08	1.05968	0.564055	1.62374	-1.02604	2.13834e-06	2.5141	3.1118	0.0318045
Furalaxyl	FUX	2.25286	19.3674	16.3259	9.0816	-519.624	-270.29	-306.247	93.0509	-34.6679	-22.9676	8.85549	9.362	66.5	46.3	112.8	DTXSID4047543	COC(=O)C(C)N(C(=O)C1=CC=CO1)C1=C(C)C=CC=C1C	10.72	-9.4	2.34	3.05	-10.72	-8.45	5.23e-07	0.000748359	2.61	0	3	1.09127	0.457479	1.54875	-1.07355	0.000101926	2.5141	2.9894	0.0105966
Imazaquin	IMQ	-3.71538	-2.50672	-2.70413	0.473043	-207.725	27.4425	-12.2439	88.116	-44.0445	-24.2674	14.9316	4.614	69	53.2	122.2	DTXSID3024152	CC(C)C1(C)N=C(NC1=O)C1=NC2=C(C=CC=C2)C=C1C(O)=O	15.87	-13.63	2.92	3.52	-15.87	-13.07	1.71e-10	0.00301365	1.13	-1	3.03	0.537834	0.90427	1.4421	-0.905557	0.000410459	2.5141	3.05106	0.0210579
Loratadine	LOR	-4.19018	-2.80865	-3.0164	0.482888	-62.1422	222.742	186.523	88.788	-28.5098	-17.544	9.51618	13.235	99.5	30.7	130.2	DTXSID2023224	CCOC(=O)N1CCC(CC1)=C1C2=C(CCC3=C1N=CC=C3)C=C(Cl)C=C2	13.85	-8.86	5.88	5.65	-13.85	-8.62	3.61e-10	8.16e-06	5.2	0	3.14	0.48683	0.899841	1.38667	-0.750905	1.11139e-06	2.5141	3.14987	0.00986762
Thiabendazole	THIA	-3.35848	-1.94423	-2.20762	0.580135	-115.087	72.9719	48.6384	60.9654	-33.2399	-16.7148	11.7347	6.355	95	43	138	DTXSID0021337	N1C2=C(C=CC=C2)N=C1C1=CSC=N1	11.24	-10.02	1.48	2.01	-11.24	-9.69	4.04e-09	0.0002519	2.35	0	3.17	0.317121	0.527705	0.844825	-0.565193	3.43088e-05	2.5141	2.79377	0.376233
Corticosterone	COR	-3.28972	-2.1863	-2.32225	0.421825	-198.507	65.6816	25.2714	100.411	-35.9713	-19.1179	11.4809	8.796	98.8	42.7	141.5	DTXSID6022474	C[C@]12C[C@H](O)[C@H]3[C@@H](CCC4=CC(=O)CC[C@]34C)[C@@H]1CC[C@@H]2C(=O)CO	17.46	-16.1	1.88	2.19	-17.46	-15.82	2.6e-09	0.000573392	1.94	0	2.28	0.648405	0.344944	0.99335	-1.18106	7.8096e-05	2.5141	2.32647	0.0464685
Carbimazole	CRL	-3.77482	-2.11077	-2.35666	0.558769	-178.718	29.6087	-2.67713	79.618	-45.2981	-30.9452	10.0293	4.293	121	23	144	DTXSID9022736	CCOC(=O)N1C=CN(C)C1=S	8.47	-9.37	-0.78	-0.21	-8.47	-9.02	0.000783272	0.00409703	0.01	0	1.94	0.211558	0.237935	0.449493	-0.934675	0.000558015	2.5141	2.02948	0.0894761
Fuberidazole	FUB	-3.41969	-2.02466	-2.18881	0.411354	-46.4109	126.834	95.8821	70.1612	-28.9849	-15.6336	10.4249	6.631	108	43.1	151.1	DTXSID4041995	N1C2=CC=CC=C2N=C1C1=CC=CO1	9.43	-6.74	2.94	3.33	-9.43	-6.45	4.86e-07	0.000392213	2.65	0	2.55	0.24801	0.740209	0.988218	-0.829413	5.34194e-05	2.5141	2.67296	0.122959
Tebufenpyrad	TBFD	-4.49044	-3.11682	-3.35449	0.53147	60.0604	183.666	161.793	52.1251	-25.7633	-16.6409	6.92629	14.042	96.5	66.455	162.955	DTXSID0034223	CCC1=NN(C)C(C(=O)NCC2=CC=C(C=C2)C(C)(C)C)=C1Cl	13.92	-10.38	4.2	4.72	-13.92	-9.73	9e-07	7.53e-06	4.59	0	2.72	0.590945	0.377	0.967945	-0.683581	1.02559e-06	2.5141	2.79846	0.0784645
Tetraconazole	TTC	-3.95989	-2.64867	-2.97477	0.608736	-281.146	-77.4512	-103.462	77.8509	-29.6798	-18.3431	8.84149	10.886	96.3	94.2	190.5	DTXSID8034956	FC(F)C(F)(F)OCC(CN1C=NC=N1)C1=C(Cl)C=C(Cl)C=C1	10.34	-8.43	2.6	3.3	-10.34	-7.62	1.35e-06	0.000416843	3.55	0	2.45	0.348936	0.574646	0.923581	-1.0462	5.6774e-05	2.5141	2.39154	0.0584582
Fluoxastrobin	FLX	-4.82653	-3.25493	-3.52093	0.592812	-267.821	42.0277	-9.21975	105.906	-21.3284	-12.0154	7.33043	10.725	148.4	65.035	213.435	DTXSID2034625	CO\N=C(\C1=NOCCO1)C1=C(OC2=NC=NC(OC3=CC=CC=C3Cl)=C2F)C=CC=C1	15.94	-12.66	4.18	3.44	-15.94	-12.9	1.3e-10	5.01e-06	4.01	0	2.86	0.574598	0.52616	1.10076	-0.840332	6.82362e-07	2.5141	2.77453	0.0854731
Aldoxycarb	ALD	-2.98617	-1.83142	-2.03098	0.419689	-357.576	-100.86	-159.378	115.514	-41.9601	-25.4715	11.2145	3.297	148	66.6	214.6	DTXSID6023862	CNC(=O)ON=CC(C)(C)S(C)(=O)=O	10.43	-12.06	-1.53	-0.44	-10.43	-11.36	8.8e-05	0.0210245	-0.57	0	1.75	0.207212	0.264125	0.471336	-1.30573	0.00286354	2.5141	1.68257	0.067431
Dicrotophos	DCHP	-3.84159	-2.36952	-2.53413	0.509358	-147.106	30.8233	-5.42583	79.6892	-57.3765	-40.0517	12.0881	4.448	163.9	57.2	221.1	DTXSID9023914	COP(=O)(OC)O\C(C)=C\C(=O)N(C)C	9.45	-9.46	-0.08	0.41	-9.45	-9.21	0.00015999	4.20595	-1.07	0	2.97	0.624908	0.254127	0.879036	-1.01189	0.57285	2.5141	2.95409	0.0159085
Carbamazepine	CARB	-3.36505	-2.26658	-2.49445	0.472587	-31.5004	156.392	129.953	72.8932	-36.3263	-21.6699	11.3351	7.473	156	142.1	298.1	DTXSID4022731	NC(=O)N1C2=CC=CC=C2C=CC2=C1C=CC=C2	12.14	-10.56	2.22	2.48	-12.14	-10.25	6.27e-10	0.000490347	1.88	0	2.91	0.396594	0.729306	1.1259	-0.965287	6.67853e-05	2.5141	2.67478	0.23522
Glybenclamide	GLY	-5.76289	-4.37987	-4.62751	0.59527	-602.004	-190.326	-280.623	168.754	-57.9536	-38.2303	15.2171	9.464	205	104.8	309.8	DTXSID0037237	COC1=C(C=C(Cl)C=C1)C(=O)NCCC1=CC=C(C=C1)S(=O)(=O)NC(=O)NC1CCCCC1	22.5	-19.05	4.34	4.91	-22.5	-18.39	9.29e-10	8.12e-06	1.63	0	1.97	1.07275	0.878638	1.95139	-1.56713	1.10594e-06	2.5141	2.89836	0.928361
2-Amino-6-methoxybenzothiazole	2AM6	-3.24483	-1.97438	-2.16691	0.478252	-108.695	49.9818	18.0561	73.1367	-34.1954	-21.0932	9.57469	5.878	224.5	91.3	315.8	DTXSID9024485	COC1=CC2=C(C=C1)N=C(N)S2	9.17	-8.23	1.18	1.62	-9.17	-7.93	1.23e-06	0.000381362	2.19	0	2.85	0.408535	0.436812	0.845347	-0.992183	5.19415e-05	2.5141	2.36732	0.482684
CI-1044	CL10	-5.24281	-3.69113	-3.97017	0.600461	-176.471	60.8406	26.6367	92.6452	-67.1522	-46.3279	14.6903	6.282	205	157.2	362.2	DTXSID5047291	NC1=CC2=C3N(CCC3=C1)C(=O)[C@H](NC(=O)C1=CC=CN=C1)N=C2C1=CC=CC=C1	19.82	-19.3	1.85	1.88	-19.82	-18.96	4.28e-10	2.38e-06	1.97	0	2.85	0.658265	0.380349	1.03861	-1.2063	3.24156e-07	2.5141	2.34641	0.50359
Dinotefuran	DINO	-2.50848	-1.49099	-1.6601	0.406445	-189.773	54.6153	30.1772	80.6913	-45.795	-28.9391	11.1465	3.076	292	106.3	398.3	DTXSID7034549	CNC(NCC1CCOC1)=N[N+]([O-])=O	9.97	-10.25	-0.28	0.11	-9.97	-10.13	4.58e-07	0.195741	-0.69	1	1.9	0.313165	0.128562	0.441727	-0.96974	0.0266599	2.5141	2.01275	0.112747
Thiamethoxam	THIX	-3.95161	-2.41797	-2.68949	0.588907	-291.617	-85.4072	-121.61	85.1481	-58.3595	-41.6218	11.5466	3.927	292	106.4	398.4	DTXSID2034962	CN1COCN(CC2=CN=C(Cl)S2)C1=N[N+]([O-])=O	11.17	-11.71	-0.09	0.22	-11.17	-11.43	1.54e-06	0.01393	-1.28	1	1.87	0.349799	0.169761	0.519559	-1.04105	0.00189727	2.5141	1.99451	0.124509
Tebufenozide	TBF	-5.15931	-3.19763	-3.54688	0.752874	-104.579	112.436	77.7549	84.6091	-33.7478	-20.3803	9.25248	11.491	287.5	117.6	405.1	DTXSID4034948	CCC1=CC=C(C=C1)C(=O)NN(C(=O)C1=CC(C)=CC(C)=C1)C(C)(C)C	14.14	-9.34	6.01	6.56	-14.14	-8.39	2.24e-08	2.34e-06	4.25	0	2.25	0.462532	0.273827	0.736359	-1.01717	3.18708e-07	2.5141	2.23329	0.0167106

## Sheet: model 2
Chemical name	Chem	LJ p1	LJ p2	LJ p3	LJ std	Coul p1	Coul p2	Coul p3	Coul std	W LJ p2	W LJ p3	W LJ std	RT	Param penalty	Charge penalty	Total	DTXSID	SMILES	log Kma	log Kaw	logKow	logKmw	logKam	logKaw	VP	Sw	logD5	Native Charge	log RRF	H LJ	W LJ	LJ	H Coul	SW	const	calc log RRF	AE	MAE	R2			coef
4-(3-Phenylpropyl)pyridine	43PP	-3.24298	-2.07349	-2.22881	0.427673	-3.06968	145.729	121.707	60.3382	-20.0894	-9.87059	7.65158	10.952	0	0	0	DTXSID5044869	C(CC1=CC=CC=C1)CC1=CC=NC=C1	7.91	-4.65	3.61	3.57	-7.91	-4.54	0.0027234	6.68e-06	2.87	1	2.58	0.61747	0.467849	1.08532	-0.834455	7.59516e-07	2.514	2.76486	0.184865	0.171402	0.739676		const	2.514
4-Acetylaminophenylacetic acid	ACT	-3.28125	-2.08457	-2.27008	0.457439	-153.701	19.2334	-10.8744	78.059	-40.7907	-21.8914	12.5278	1.912	0	0	0	DTXSID0020020	CC(=O)NC1=CC=C(CC(O)=O)C=C1	13.06	-12.61	0.32	1.21	-13.06	-12.26	2.16e-06	0.00185273	1.08	-1	1.89	0.551292	0.336682	0.887974	-1.25185	0.000210655	2.514	2.15034	0.260336				LJ p1	0.527
Cinchophen	CIN	-3.54691	-2.19092	-2.40933	0.531233	-127.006	45.3061	10.2474	95.2556	-13.3274	-0.9885	8.50478	15.657	0.5	0.2	0.7	DTXSID0040705	OC(=O)C1=C2C=CC=CC2=NC(=C1)C1=CC=CC=C1	12.15	-8.69	3.95	4.03	-12.15	-8.52	3.5e-09	0.000641245	3.42	-1	1.73	0.580138	0.413882	0.99402	-1.75775	7.29096e-05	2.514	1.75034	0.0203411				LJ p2	-6.0376
N-Ethyl-4-menthane-3-carboxamide	NEM	-2.60657	-1.66901	-1.8107	0.341423	24.2772	158.986	135.431	52.0174	-25.2629	-13.3666	9.47849	10.645	0.6	0.519	1.119	DTXSID5047039	CCNC(=O)C1CC(C)CCC1C(C)C	8.14	-3.76	4.72	4.92	-8.14	-3.43	0.000943903	0.00414768	2.44	0	3.03	0.401803	0.708433	1.11024	-0.627969	0.000471591	2.514	2.99674	0.033261				LJ p3	5.2397
N,N'-Dibutylthiourea	NND	-3.21176	-2.08737	-2.2914	0.447813	58.0607	270.733	238.878	84.8314	-36.0218	-20.4694	10.7804	8.105	1	0.6	1.6	DTXSID8042187	CCCCNC(=S)NCCCC	8.35	-6.24	2.41	2.61	-8.35	-6.01	0.0386665	0.043122	1.69	0	1.88	0.459707	0.405895	0.865602	-1.16614	0.00490297	2.514	2.21837	0.338367				LJ std	3.4743
Diuron	DIU	-3.45836	-2.03753	-2.25934	0.500538	-133.36	53.6558	19.6381	78.227	-33.0375	-20.2481	9.11199	8.425	1	0.6	1.6	DTXSID0020446	CN(C)C(=O)NC1=CC(Cl)=C(Cl)C=C1	10.54	-8.15	2.4	2.56	-10.54	-8.14	6.92e-08	0.000173803	2.68	0	2.52	0.380009	0.386371	0.766381	-1.10713	1.97614e-05	2.514	2.17327	0.346733				Coul p1	-0.0054
4-Chlorophenylurea	4CHL	-2.83136	-1.71348	-1.89099	0.393588	-128.57	66.6197	35.1217	85.2973	-25.4318	-11.0802	9.89136	5.953	1	0.6	1.6	DTXSID5041512	NC(=O)NC1=CC=C(Cl)C=C1	9.88	-8.41	1.44	1.87	-9.88	-8.3	3.65e-05	0.0106003	1.8	0	1.88	0.312409	0.411666	0.724075	-1.34365	0.00120525	2.514	1.89563	0.0156287				Coul p2	0.0221
N-Butyl-p-toluenesulfonamide	NBPT	-3.34659	-1.99016	-2.18417	0.49271	-161.476	28.6812	-7.9777	88.8981	-29.1874	-18.1149	8.16034	8.775	0.9	0.766	1.666	DTXSID7042198	CCCCNS(=O)(=O)C1=CC=C(C)C=C1	9.06	-7.01	2.35	2.64	-9.06	-6.71	9.18e-07	0.00669955	2.51	0	2.45	0.519571	0.414571	0.934142	-1.42144	0.000761739	2.514	2.02747	0.422531				Coul p3	-0.0164
Laurocapram	LAU	-3.96008	-2.70012	-2.86276	0.468695	27.6507	264.524	232.133	86.6178	-16.2986	-7.98175	6.47953	16.89	0.9	1.1	2	DTXSID0042086	CCCCCCCCCCCCN1CCCCCC1=O	10.32	-4.1	6.48	6.12	-10.32	-4.15	7.06e-06	0.000303456	5.73	0	2.6	0.843629	0.459262	1.30289	-1.08997	3.45029e-05	2.514	2.72696	0.126955				Coul std	-0.0344
N-Phenyldiethanolamine	NNP	-0.456924	-0.006627	-0.017877	0.0807382	-71.3764	0.726161	0.157415	11.9904	-28.2707	-12.0279	11.246	5.6	4	3.4	7.4	DTXSID5021962	OCCN(CCO)C1=CC=CC=C1	11.15	-11.02	0.24	0.87	-11.15	-10.7	4.46e-05	0.184424	0.97	0	2.87	-0.0139492	0.485358	0.471409	-0.013569	0.020969	2.514	2.99281	0.122809				W LJ p2	0.1795
Diphenylacetonitrile	DACN	-3.46023	-2.02401	-2.26743	0.491691	-103.881	38.0224	18.3374	56.7663	-32.2824	-21.7459	8.18723	7.481	4	7.7	11.7	DTXSID4020539	N#CC(C1=CC=CC=C1)C1=CC=CC=C1	8.48	-6.39	2.55	3.08	-8.48	-5.83	0.000198568	0.00111939	3	0	1.97	0.224262	0.493695	0.717958	-0.852237	0.000127275	2.514	2.37985	0.409848				W LJ p3	-0.1725
N-(2,4-Dimethylphenyl)acetamide	NMD	-2.96463	-1.874	-2.03836	0.411927	-119.907	61.6689	30.1895	75.1832	-36.706	-24.2338	9.09945	6.083	0	27.149	27.149	DTXSID0044868	CC(=O)NC1=CC=C(C)C=C1C	8.37	-6.97	1.52	1.89	-8.37	-6.75	3.11e-06	0.019369	1.47	0	2.83	0.502825	0.411536	0.914361	-1.07103	0.00220226	2.514	2.35953	0.470466				W LJ std	0.3099
Nuarimol	NUA	-4.78088	-2.83275	-3.11032	0.664611	-175.432	22.7551	-12.1282	85.7089	-29.4372	-14.5629	10.4778	9.455	8	29.7	37.7	DTXSID2042220	OC(C1=CC=C(F)C=C1)(C1=CN=CN=C1)C1=CC=CC=C1Cl	12.96	-10.91	2.75	3.33	-12.96	-10.27	3.37e-09	8.29e-05	3.18	0	2.26	0.595403	0.475183	1.07059	-1.29926	9.42573e-06	2.514	2.28533	0.0253336				Sw	0.1137
Dibutyl phthalate	DBP	-3.55203	-2.38291	-2.60214	0.414903	-91.797	109.828	76.039	73.017	-11.7685	-4.86631	6.11992	19.511	45	0.5	45.5	DTXSID2021781	CCCCOC(=O)C1=CC=CC=C1C(=O)OCCCC	9.61	-5.35	4.53	4.44	-9.61	-5.26	2.02e-05	4.01e-05	4.61	0	2.6	0.322217	0.623551	0.945768	-0.835918	4.55937e-06	2.514	2.62386	0.0238551
Diisobutyl phthalate	DIP	-3.39122	-2.29522	-2.42039	0.424875	-96.9415	91.5221	60.3544	78.9401	-11.4801	-3.93684	6.08924	19.511	45	0.5	45.5	DTXSID9022522	CC(C)COC(=O)C1=C(C=CC=C1)C(=O)OCC(C)C	9.03	-4.48	4.94	4.82	-9.03	-4.34	3.72e-05	2.22e-05	4.11	0	2.6	0.864479	0.505478	1.36996	-1.15923	2.52414e-06	2.514	2.72473	0.12473				x	y
Dicyclohexyl phthalate	DCP	-3.98669	-2.54607	-2.7839	0.534348	-10.5503	172.976	137.214	80.4413	-28.5586	-17.7397	8.08349	11.739	45	0.8	45.8	DTXSID5025021	O=C(OC1CCCCC1)C1=C(C=CC=C1)C(=O)OC1CCCCC1	11.87	-6.59	5.75	5.5	-11.87	-6.53	8.7e-07	1.2e-05	5.83	0	2.14	0.540815	0.438908	0.979722	-1.13774	1.3644e-06	2.514	2.35598	0.215982				1	1
Cladribine	CLA	-3.37826	-2.21368	-2.39425	0.42711	-179.996	37.3568	3.03414	99.9986	-43.5838	-21.9903	14.6075	3.77	20	30.6	50.6	DTXSID8022828	NC1=NC(Cl)=NC2=C1N=CN2[C@H]1C[C@H](O)[C@@H](CO)O1	17.48	-19.6	-1.95	-1.35	-17.48	-19.46	3.91e-10	0.0218731	-0.02	0	1.86	0.523782	0.496905	1.02069	-1.69215	0.00248697	2.514	1.84503	0.0149717				4	4
Warfarin	WAR	-4.35527	-2.95675	-3.25215	0.664767	-297.898	-61.7677	-111.558	108.462	-49.065	-32.5962	12.9086	6.168	30	22.5	52.5	DTXSID5023742	CC(=O)CC(C1=CC=CC=C1)C1=C(O)C2=CC=CC=C2OC1=O	15.07	-13.12	2.29	2.4	-15.07	-13.04	1.15e-07	9.62e-05	2.7	0	2.4	0.82574	0.816058	1.6418	-1.65798	1.09379e-05	2.514	2.49783	0.097831
Deethylatrazine	DEE	-2.57574	-1.63635	-1.80638	0.378107	-28.9487	87.6779	66.902	49.2695	-32.2737	-20.6503	7.91497	5.607	22	32.4	54.4	DTXSID5037494	CC(C)NC1=NC(Cl)=NC(N)=N1	8.78	-8.55	0.46	0.91	-8.78	-8.26	6.17e-09	0.00571496	1.49	0	2.21	0.370978	0.221894	0.592871	-0.698057	0.000649791	2.514	2.40946	0.199464				1	2
4-Aminoazobenzene	4AMI	-3.55332	-2.12077	-2.46364	0.594001	16.7211	149.268	126.384	62.7085	-29.1048	-17.3426	9.07472	9.147	0	59.7	59.7	DTXSID6024460	NC1=CC=C(C=C1)N=NC1=CC=CC=C1	9.88	-7	2.86	2.86	-9.88	-7.1	1.41e-06	0.000162574	3.41	0	2.13	0.0867687	0.579541	0.66631	-1.02135	1.84847e-05	2.514	2.15898	0.0289793				4	5
Dipropyl 2,5-pyridinedicarboxylate	DPPL	-3.13945	-2.10393	-2.24475	0.397087	-223.768	16.6598	-23.12	82.3688	-28.4025	-16.7159	8.0929	10.373	45	25	70	DTXSID8032544	CCCOC(=O)C1=CC=C(N=C1)C(=O)OCCC	8.92	-5.73	3.37	3.42	-8.92	-5.61	2.12e-05	0.00276899	3.22	0	2.78	0.665974	0.293248	0.959222	-0.877788	0.000314834	2.514	2.59575	0.184252
Sulfamethazine	SUL	-3.73178	-2.31017	-2.47765	0.440205	-212.074	37.1091	-6.08981	90.4758	-53.3992	-37.8955	11.7311	4.055	60	13.7	73.7	DTXSID6021290	CC1=CC(C)=NC(NS(=O)(=O)C2=CC=C(N)C=C2)=N1	14.47	-14.69	0.29	1.08	-14.47	-14.1	8.56e-10	0.00431954	0.19	0	2.61	0.528485	0.587297	1.11578	-1.04718	0.000491132	2.514	2.58309	0.0269099				1	0
Pyrimethamine	PYRA	-3.76982	-2.48428	-2.70934	0.495674	87.4885	237.597	208.584	69.0459	-38.1613	-22.1267	12.0511	8.267	56.6	20.475	77.075	DTXSID9021217	CCC1=NC(N)=NC(N)=C1C1=CC=C(Cl)C=C1	12.15	-11.3	1.75	2.66	-12.15	-10.39	1.32e-08	0.000394892	1.44	1	3	0.538411	0.701537	1.23995	-1.01751	4.48992e-05	2.514	2.73649	0.263514				4	3
Fluazifop-butyl	FLZ	-4.67256	-3.27531	-3.49302	0.531297	-186.993	11.9823	-28.6363	81.8973	-26.6721	-14.9339	8.23996	13.933	45	36.672	81.672	DTXSID3034612	CCCCOC(=O)C(C)OC1=CC=C(OC2=CC=C(C=N2)C(F)(F)F)C=C1	11.27	-7.34	4.62	4.59	-11.27	-7.02	4.12e-07	2.76e-06	4.5	0	2.79	0.856074	0.342014	1.19809	-1.07306	3.13812e-07	2.514	2.63903	0.150974
Ilepatril	ILE	-4.36299	-2.96203	-3.17368	0.570824	-460.716	3.85142	-69.4297	169.501	-50.1728	-28.5213	15.0769	7.283	61	20.8	81.8	DTXSID7047356	CC(C)[C@H](SC(C)=O)C(=O)N[C@H]1CC2=C(C=CC=C2)[C@H]2CCC[C@H](N2C1=O)C(O)=O	21.1	-19.29	2.66	3.36	-21.1	-18.6	3.49e-10	0.00257684	1.07	-1	2.04	0.938346	0.586218	1.52456	-2.11919	0.000292987	2.514	1.91967	0.120328
Caffeine	CAF	-2.55202	-1.47673	-1.70342	0.425109	-201.376	-16.463	-47.9279	71.5165	-42.2426	-25.3746	11.6585	4.091	47.5	35.3	82.8	DTXSID0020232	CN1C=NC2=C1C(=O)N(C)C(=O)N2C	9.58	-9.44	0	0.08	-9.58	-9.59	2.06e-06	0.111749	-0.07	0	1.87	0.122516	0.407522	0.530038	-0.950554	0.0127059	2.514	2.10619	0.23619
Boscalid	BOS	-4.33707	-2.72118	-2.91432	0.51589	-142.328	45.4913	11.2805	85.0208	-32.6366	-21.4258	8.40299	9.802	55	28.7	83.7	DTXSID6034392	ClC1=CC=C(C=C1)C1=C(NC(=O)C2=C(Cl)N=CC=C2)C=CC=C1	13.91	-9.65	5.11	5.36	-13.91	-9.16	1.17e-09	1.06e-05	2.96	0	2.2	0.665937	0.441773	1.10771	-1.33579	1.20522e-06	2.514	2.28592	0.0859217
CP-457920	CP4	-3.89772	-2.49621	-2.73558	0.569947	-32.278	170.633	121.391	94.3348	-36.9156	-17.5731	13.578	9.097	45	50.8	95.8	DTXSID4047254	CCOC1=NC2=C(NC=C(C(=O)NCC3=CC=CC=C3)C2=O)C=C1	17.26	-15.73	1.97	2.12	-17.26	-15.66	4.7e-07	2.08e-05	1.12	0	2.45	0.663603	0.612834	1.27644	-1.29065	2.36496e-06	2.514	2.49979	0.0497913
Azoxystrobin	AZO	-4.77726	-3.48136	-3.67954	0.569998	-206.4	19.927	-31.7705	98.2671	-44.092	-28.8249	11.4304	9.387	79	32.6	111.6	DTXSID0032520	CO\C=C(\C(=O)OC)C1=CC=CC=C1OC1=CC(OC2=CC=CC=C2C#N)=NC=N1	16.05	-14.56	2.55	2.92	-16.05	-13.91	8.33e-13	1.57e-05	2.5	0	3.08	1.20207	0.600068	1.80214	-1.30441	1.78509e-06	2.514	3.01174	0.0682648
Furalaxyl	FUX	2.25286	19.3674	16.3259	9.0816	-519.624	-270.29	-306.247	93.0509	-34.6679	-22.9676	8.85549	9.362	66.5	46.3	112.8	DTXSID4047543	COC(=O)C(C)N(C(=O)C1=CC=CO1)C1=C(C)C=CC=C1C	10.72	-9.4	2.34	3.05	-10.72	-8.45	5.23e-07	0.000748359	2.61	0	3	1.34986	0.483334	1.83319	-1.34595	8.50884e-05	2.514	3.00133	0.00132978
Imazaquin	IMQ	-3.71538	-2.50672	-2.70413	0.473043	-207.725	27.4425	-12.2439	88.116	-44.0445	-24.2674	14.9316	4.614	69	53.2	122.2	DTXSID3024152	CC(C)C1(C)N=C(NC1=O)C1=NC2=C(C=CC=C2)C=C1C(O)=O	15.87	-13.63	2.92	3.52	-15.87	-13.07	1.71e-10	0.00301365	1.13	-1	3.03	0.651215	0.907421	1.55864	-1.10219	0.000342652	2.514	2.97078	0.0592154
Loratadine	LOR	-4.19018	-2.80865	-3.0164	0.482888	-62.1422	222.742	186.523	88.788	-28.5098	-17.544	9.51618	13.235	99.5	30.7	130.2	DTXSID2023224	CCOC(=O)N1CCC(CC1)=C1C2=C(CCC3=C1N=CC=C3)C=C(Cl)C=C2	13.85	-8.86	5.88	5.65	-13.85	-8.62	3.61e-10	8.16e-06	5.2	0	3.14	0.621972	0.857899	1.47987	-0.855115	9.27792e-07	2.514	3.13876	0.00124357
Thiabendazole	THIA	-3.35848	-1.94423	-2.20762	0.580135	-115.087	72.9719	48.6384	60.9654	-33.2399	-16.7148	11.7347	6.355	95	43	138	DTXSID0021337	N1C2=C(C=CC=C2)N=C1C1=CSC=N1	11.24	-10.02	1.48	2.01	-11.24	-9.69	4.04e-09	0.0002519	2.35	0	3.17	0.416884	0.553308	0.970192	-0.66073	2.8641e-05	2.514	2.82349	0.34651
Corticosterone	COR	-3.28972	-2.1863	-2.32225	0.421825	-198.507	65.6816	25.2714	100.411	-35.9713	-19.1179	11.4809	8.796	98.8	42.7	141.5	DTXSID6022474	C[C@]12C[C@H](O)[C@H]3[C@@H](CCC4=CC(=O)CC[C@]34C)[C@@H]1CC[C@@H]2C(=O)CO	17.46	-16.1	1.88	2.19	-17.46	-15.82	2.6e-09	0.000573392	1.94	0	2.28	0.763969	0.398922	1.16289	-1.34509	6.51947e-05	2.514	2.33187	0.0518711
Carbimazole	CRL	-3.77482	-2.11077	-2.35666	0.558769	-178.718	29.6087	-2.67713	79.618	-45.2981	-30.9452	10.0293	4.293	121	23	144	DTXSID9022736	CCOC(=O)N1C=CN(C)C1=S	8.47	-9.37	-0.78	-0.21	-8.47	-9.02	0.000783272	0.00409703	0.01	0	1.94	0.347781	0.315124	0.662904	-1.07553	0.000465832	2.514	2.10184	0.161843
Fuberidazole	FUB	-3.41969	-2.02466	-2.18881	0.411354	-46.4109	126.834	95.8821	70.1612	-28.9849	-15.6336	10.4249	6.631	108	43.1	151.1	DTXSID4041995	N1C2=CC=CC=C2N=C1C1=CC=CO1	9.43	-6.74	2.94	3.33	-9.43	-6.45	4.86e-07	0.000392213	2.65	0	2.55	0.382388	0.724683	1.10707	-0.932362	4.45946e-05	2.514	2.68875	0.138754
Tebufenpyrad	TBFD	-4.49044	-3.11682	-3.35449	0.53147	60.0604	183.666	161.793	52.1251	-25.7633	-16.6409	6.92629	14.042	96.5	66.455	162.955	DTXSID0034223	CCC1=NN(C)C(C(=O)NCC2=CC=C(C=C2)C(C)(C)C)=C1Cl	13.92	-10.38	4.2	4.72	-13.92	-9.73	9e-07	7.53e-06	4.59	0	2.72	0.721639	0.392501	1.11414	-0.711813	8.56161e-07	2.514	2.91633	0.196327
Tetraconazole	TTC	-3.95989	-2.64867	-2.97477	0.608736	-281.146	-77.4512	-103.462	77.8509	-29.6798	-18.3431	8.84149	10.886	96.3	94.2	190.5	DTXSID8034956	FC(F)C(F)(F)OCC(CN1C=NC=N1)C1=C(Cl)C=C(Cl)C=C1	10.34	-8.43	2.6	3.3	-10.34	-7.62	1.35e-06	0.000416843	3.55	0	2.45	0.4328	0.576629	1.00943	-1.17478	4.7395e-05	2.514	2.34869	0.101308
Fluoxastrobin	FLX	-4.82653	-3.25493	-3.52093	0.592812	-267.821	42.0277	-9.21975	105.906	-21.3284	-12.0154	7.33043	10.725	148.4	65.035	213.435	DTXSID2034625	CO\N=C(\C1=NOCCO1)C1=C(OC2=NC=NC(OC3=CC=CC=C3Cl)=C2F)C=CC=C1	15.94	-12.66	4.18	3.44	-15.94	-12.9	1.3e-10	5.01e-06	4.01	0	2.86	0.719369	0.515914	1.23528	-1.11693	5.69637e-07	2.514	2.63235	0.227649
Aldoxycarb	ALD	-2.98617	-1.83142	-2.03098	0.419689	-357.576	-100.86	-159.378	115.514	-41.9601	-25.4715	11.2145	3.297	148	66.6	214.6	DTXSID6023862	CNC(=O)ON=CC(C)(C)S(C)(=O)=O	10.43	-12.06	-1.53	-0.44	-10.43	-11.36	8.8e-05	0.0210245	-0.57	0	1.75	0.300077	0.337364	0.637442	-1.65798	0.00239049	2.514	1.49585	0.254153
Dicrotophos	DCHP	-3.84159	-2.36952	-2.53413	0.509358	-147.106	30.8233	-5.42583	79.6892	-57.3765	-40.0517	12.0881	4.448	163.9	57.2	221.1	DTXSID9023914	COP(=O)(OC)O\C(C)=C\C(=O)N(C)C	9.45	-9.46	-0.08	0.41	-9.45	-9.21	0.00015999	4.20595	-1.07	0	2.97	0.773237	0.355929	1.12917	-1.17676	0.478217	2.514	2.94463	0.0253726
Carbamazepine	CARB	-3.36505	-2.26658	-2.49445	0.472587	-31.5004	156.392	129.953	72.8932	-36.3263	-21.6699	11.3351	7.473	156	142.1	298.1	DTXSID4022731	NC(=O)N1C2=CC=CC=C2C=CC2=C1C=CC=C2	12.14	-10.56	2.22	2.48	-12.14	-10.25	6.27e-10	0.000490347	1.88	0	2.91	0.483097	0.730224	1.21332	-1.01238	5.57525e-05	2.514	2.71499	0.195005
Glybenclamide	GLY	-5.76289	-4.37987	-4.62751	0.59527	-602.004	-190.326	-280.623	168.754	-57.9536	-38.2303	15.2171	9.464	205	104.8	309.8	DTXSID0037237	COC1=C(C=C(Cl)C=C1)C(=O)NCCC1=CC=C(C=C1)S(=O)(=O)NC(=O)NC1CCCCC1	22.5	-19.05	4.34	4.91	-22.5	-18.39	9.29e-10	8.12e-06	1.63	0	1.97	1.22823	0.907821	2.13605	-2.15831	9.23244e-07	2.514	2.49175	0.521747
2-Amino-6-methoxybenzothiazole	2AM6	-3.24483	-1.97438	-2.16691	0.478252	-108.695	49.9818	18.0561	73.1367	-34.1954	-21.0932	9.57469	5.878	224.5	91.3	315.8	DTXSID9024485	COC1=CC2=C(C=C1)N=C(N)S2	9.17	-8.23	1.18	1.62	-9.17	-7.93	1.23e-06	0.000381362	2.19	0	2.85	0.518125	0.467696	0.985821	-1.12047	4.33609e-05	2.514	2.37939	0.470609
CI-1044	CL10	-5.24281	-3.69113	-3.97017	0.600461	-176.471	60.8406	26.6367	92.6452	-67.1522	-46.3279	14.6903	6.282	205	157.2	362.2	DTXSID5047291	NC1=CC2=C3N(CCC3=C1)C(=O)[C@H](NC(=O)C1=CC=CN=C1)N=C2C1=CC=CC=C1	19.82	-19.3	1.85	1.88	-19.82	-18.96	4.28e-10	2.38e-06	1.97	0	2.85	0.806321	0.490249	1.29657	-1.32632	2.70606e-07	2.514	2.48425	0.365746
Dinotefuran	DINO	-2.50848	-1.49099	-1.6601	0.406445	-189.773	54.6153	30.1772	80.6913	-45.795	-28.9391	11.1465	3.076	292	106.3	398.3	DTXSID7034549	CNC(NCC1CCOC1)=N[N+]([O-])=O	9.97	-10.25	-0.28	0.11	-9.97	-10.13	4.58e-07	0.195741	-0.69	1	1.9	0.393716	0.22611	0.619826	-1.03892	0.0222558	2.514	2.11716	0.217163
Thiamethoxam	THIX	-3.95161	-2.41797	-2.68949	0.588907	-291.617	-85.4072	-121.61	85.1481	-58.3595	-41.6218	11.5466	3.927	292	106.4	398.4	DTXSID2034962	CN1COCN(CC2=CN=C(Cl)S2)C1=N[N+]([O-])=O	11.17	-11.71	-0.09	0.22	-11.17	-11.43	1.54e-06	0.01393	-1.28	1	1.87	0.47015	0.282521	0.752671	-1.24745	0.00158384	2.514	2.0208	0.150801
Tebufenozide	TBF	-5.15931	-3.19763	-3.54688	0.752874	-104.579	112.436	77.7549	84.6091	-33.7478	-20.3803	9.25248	11.491	287.5	117.6	405.1	DTXSID4034948	CCC1=CC=C(C=C1)C(=O)NN(C(=O)C1=CC(C)=CC(C)=C1)C(C)(C)C	14.14	-9.34	6.01	6.56	-14.14	-8.39	2.24e-08	2.34e-06	4.25	0	2.25	0.618197	0.325204	0.9434	-1.13617	2.66058e-07	2.514	2.32123	0.071231

## Sheet: model cv
Chemical name	Chem	LJ p1	LJ p2	LJ p3	LJ std	Coul p1	Coul p2	Coul p3	Coul std	W LJ p2	W LJ p3	W LJ std	RT	Param penalty	Charge penalty	Total	DTXSID	SMILES	log Kma	log Kaw	logKow	logKmw	logKam	logKaw	VP	Sw	logD5	Native Charge	H LJ	W LJ	H Coul	SW	const	calc log RRF	cv log RRF	log RRF	cv log RRF clean	n	kg	AE	MAE	R2			coef
4-(3-Phenylpropyl)pyridine	43PP	-3.24298	-2.07349	-2.22881	0.427673	-3.06968	145.729	121.707	60.3382	-20.0894	-9.87059	7.65158	10.952	0	0	0	DTXSID5044869	C(CC1=CC=CC=C1)CC1=CC=NC=C1	7.91	-4.65	3.61	3.57	-7.91	-4.54	0.0027234	6.68e-06	2.87	1	0.603555	0.424601	-0.827294	6.98761e-07	2.55556	2.75642	2.8039	2.58	2.8039	1	1	0.223899	0.247499	0.521942		const	2.55556
4-Acetylaminophenylacetic acid	ACT	-3.28125	-2.08457	-2.27008	0.457439	-153.701	19.2334	-10.8744	78.059	-40.7907	-21.8914	12.5278	1.912	0	0	0	DTXSID0020020	CC(=O)NC1=CC=C(CC(O)=O)C=C1	13.06	-12.61	0.32	1.21	-13.06	-12.26	2.16e-06	0.00185273	1.08	-1	0.540844	0.332686	-1.24233	0.000193805	2.55556	2.18696	2.22332	1.89	2.22332	2	1	0.333317				LJ p1	0.571085
Cinchophen	CIN	-3.54691	-2.19092	-2.40933	0.531233	-127.006	45.3061	10.2474	95.2556	-13.3274	-0.9885	8.50478	15.657	0.5	0.2	0.7	DTXSID0040705	OC(=O)C1=C2C=CC=CC2=NC(=C1)C1=CC=CC=C1	12.15	-8.69	3.95	4.03	-12.15	-8.52	3.5e-09	0.000641245	3.42	-1	0.569542	0.35598	-1.76258	6.70773e-05	2.55556	1.71856	1.82425	1.73	1.82425	3	1	0.0942523				LJ p2	-5.96878
N-Ethyl-4-menthane-3-carboxamide	NEM	-2.60657	-1.66901	-1.8107	0.341423	24.2772	158.986	135.431	52.0174	-25.2629	-13.3666	9.47849	10.645	0.6	0.519	1.119	DTXSID5047039	CCNC(=O)C1CC(C)CCC1C(C)C	8.14	-3.76	4.72	4.92	-8.14	-3.43	0.000943903	0.00414768	2.44	0	0.39256	0.641412	-0.628032	0.000433868	2.55556	2.96193	3.0156	3.03	3.0156	4	1	0.0144048				LJ p3	5.12553
N,N'-Dibutylthiourea	NND	-3.21176	-2.08737	-2.2914	0.447813	58.0607	270.733	238.878	84.8314	-36.0218	-20.4694	10.7804	8.105	1	0.6	1.6	DTXSID8042187	CCCCNC(=S)NCCCC	8.35	-6.24	2.41	2.61	-8.35	-6.01	0.0386665	0.043122	1.69	0	0.454174	0.391732	-1.15183	0.00451077	2.55556	2.25415	2.34537	1.88	2.34537	5	1	0.465367				LJ std	3.51474
Diuron	DIU	-3.45836	-2.03753	-2.25934	0.500538	-133.36	53.6558	19.6381	78.227	-33.0375	-20.2481	9.11199	8.425	1	0.6	1.6	DTXSID0020446	CN(C)C(=O)NC1=CC(Cl)=C(Cl)C=C1	10.54	-8.15	2.4	2.56	-10.54	-8.14	6.92e-08	0.000173803	2.68	0	0.365507	0.375809	-1.1029	1.81806e-05	2.55556	2.19399	2.12303	2.52	2.12303	1	2	0.396969				Coul p1	-0.00592231
4-Chlorophenylurea	4CHL	-2.83136	-1.71348	-1.89099	0.393588	-128.57	66.6197	35.1217	85.2973	-25.4318	-11.0802	9.89136	5.953	1	0.6	1.6	DTXSID5041512	NC(=O)NC1=CC=C(Cl)C=C1	9.88	-8.41	1.44	1.87	-9.88	-8.3	3.65e-05	0.0106003	1.8	0	0.301471	0.375973	-1.32811	0.00110884	2.55556	1.90601	1.85629	1.88	1.85629	2	2	0.023706				Coul p2	0.0197411
N-Butyl-p-toluenesulfonamide	NBPT	-3.34659	-1.99016	-2.18417	0.49271	-161.476	28.6812	-7.9777	88.8981	-29.1874	-18.1149	8.16034	8.775	0.9	0.766	1.666	DTXSID7042198	CCCCNS(=O)(=O)C1=CC=C(C)C=C1	9.06	-7.01	2.35	2.64	-9.06	-6.71	9.18e-07	0.00669955	2.51	0	0.504358	0.396516	-1.42117	0.000700806	2.55556	2.03597	1.92754	2.45	1.92754	3	2	0.522455				Coul p3	-0.0135645
Laurocapram	LAU	-3.96008	-2.70012	-2.86276	0.468695	27.6507	264.524	232.133	86.6178	-16.2986	-7.98175	6.47953	16.89	0.9	1.1	2	DTXSID0042086	CCCCCCCCCCCCN1CCCCCC1=O	10.32	-4.1	6.48	6.12	-10.32	-4.15	7.06e-06	0.000303456	5.73	0	0.829012	0.413897	-1.06413	3.1743e-05	2.55556	2.73437	2.70306	2.6	2.70306	4	2	0.103057				Coul std	-0.0343302
N-Phenyldiethanolamine	NNP	-0.456924	-0.006627	-0.017877	0.0807382	-71.3764	0.726161	0.157415	11.9904	-28.2707	-12.0279	11.246	5.6	4	3.4	7.4	DTXSID5021962	OCCN(CCO)C1=CC=CC=C1	11.15	-11.02	0.24	0.87	-11.15	-10.7	4.46e-05	0.184424	0.97	0	-0.0292425	0.4413	0.0232818	0.0192916	2.55556	3.01019	3.1545	2.87	3.1545	5	2	0.284499				W LJ p2	0.157104
Diphenylacetonitrile	DACN	-3.46023	-2.02401	-2.26743	0.491691	-103.881	38.0224	18.3374	56.7663	-32.2824	-21.7459	8.18723	7.481	4	7.7	11.7	DTXSID4020539	N#CC(C1=CC=CC=C1)C1=CC=CC=C1	8.48	-6.39	2.55	3.08	-8.48	-5.83	0.000198568	0.00111939	3	0	0.211174	0.474134	-0.831711	0.000117094	2.55556	2.40927	2.45106	1.97	2.45106	1	3	0.481058				W LJ p3	-0.153288
N-(2,4-Dimethylphenyl)acetamide	NMD	-2.96463	-1.874	-2.03836	0.411927	-119.907	61.6689	30.1895	75.1832	-36.706	-24.2338	9.09945	6.083	0	27.149	27.149	DTXSID0044868	CC(=O)NC1=CC=C(C)C=C1C	8.37	-6.97	1.52	1.89	-8.37	-6.75	3.11e-06	0.019369	1.47	0	0.492532	0.40706	-1.06302	0.00202609	2.55556	2.39416	2.32345	2.83	2.32345	2	3	0.506546				W LJ std	0.270228
Nuarimol	NUA	-4.78088	-2.83275	-3.11032	0.664611	-175.432	22.7551	-12.1282	85.7089	-29.4372	-14.5629	10.4778	9.455	8	29.7	37.7	DTXSID2042220	OC(C1=CC=C(F)C=C1)(C1=CN=CN=C1)C1=CC=CC=C1Cl	12.96	-10.91	2.75	3.33	-12.96	-10.27	3.37e-09	8.29e-05	3.18	0	0.57166	0.439026	-1.28972	8.67174e-06	2.55556	2.27654	2.4069	2.26	2.4069	3	3	0.146899				Sw	0.104605
Dibutyl phthalate	DBP	-3.55203	-2.38291	-2.60214	0.414903	-91.797	109.828	76.039	73.017	-11.7685	-4.86631	6.11992	19.511	45	0.5	45.5	DTXSID2021781	CCCCOC(=O)C1=CC=CC=C1C(=O)OCCCC	9.61	-5.35	4.53	4.44	-9.61	-5.26	2.02e-05	4.01e-05	4.61	0	0.315489	0.550848	-0.826337	4.19466e-06	2.55556	2.59556	2.6797	2.6	2.6797	4	3	0.0796955
Diisobutyl phthalate	DIP	-3.39122	-2.29522	-2.42039	0.424875	-96.9415	91.5221	60.3544	78.9401	-11.4801	-3.93684	6.08924	19.511	45	0.5	45.5	DTXSID9022522	CC(C)COC(=O)C1=C(C=CC=C1)C(=O)OCC(C)C	9.03	-4.48	4.94	4.82	-9.03	-4.34	3.72e-05	2.22e-05	4.11	0	0.850529	0.44539	-1.14784	2.32223e-06	2.55556	2.70364	2.73087	2.6	2.73087	5	3	0.130875				x	y
Dicyclohexyl phthalate	DCP	-3.98669	-2.54607	-2.7839	0.534348	-10.5503	172.976	137.214	80.4413	-28.5586	-17.7397	8.08349	11.739	45	0.8	45.8	DTXSID5025021	O=C(OC1CCCCC1)C1=C(C=CC=C1)C(=O)OC1CCCCC1	11.87	-6.59	5.75	5.5	-11.87	-6.53	8.7e-07	1.2e-05	5.83	0	0.529278	0.417026	-1.14557	1.25526e-06	2.55556	2.35629	2.40848	2.14	2.40848	1	4	0.268477				-3	-3
Cladribine	CLA	-3.37826	-2.21368	-2.39425	0.42711	-179.996	37.3568	3.03414	99.9986	-43.5838	-21.9903	14.6075	3.77	20	30.6	50.6	DTXSID8022828	NC1=NC(Cl)=NC2=C1N=CN2[C@H]1C[C@H](O)[C@@H](CO)O1	17.48	-19.6	-1.95	-1.35	-17.48	-19.46	3.91e-10	0.0218731	-0.02	0	0.51312	0.471056	-1.67067	0.00228803	2.55556	1.87135	1.81954	1.86	1.81954	2	4	0.0404633				14	14
Warfarin	WAR	-4.35527	-2.95675	-3.25215	0.664767	-297.898	-61.7677	-111.558	108.462	-49.065	-32.5962	12.9086	6.168	30	22.5	52.5	DTXSID5023742	CC(=O)CC(C1=CC=CC=C1)C1=C(O)C2=CC=CC=C2OC1=O	15.07	-13.12	2.29	2.4	-15.07	-13.04	1.15e-07	9.62e-05	2.7	0	0.828424	0.77661	-1.66543	1.0063e-05	2.55556	2.49517	2.55043	2.4	2.55043	3	4	0.150425
Deethylatrazine	DEE	-2.57574	-1.63635	-1.80638	0.378107	-28.9487	87.6779	66.902	49.2695	-32.2737	-20.6503	7.91497	5.607	22	32.4	54.4	DTXSID5037494	CC(C)NC1=NC(Cl)=NC(N)=N1	8.78	-8.55	0.46	0.91	-8.78	-8.26	6.17e-09	0.00571496	1.49	0	0.366331	0.233986	-0.696619	0.000597813	2.55556	2.45986	2.48597	2.21	2.48597	4	4	0.275967				-3	-2
4-Aminoazobenzene	4AMI	-3.55332	-2.12077	-2.46364	0.594001	16.7211	149.268	126.384	62.7085	-29.1048	-17.3426	9.07472	9.147	0	59.7	59.7	DTXSID6024460	NC1=CC=C(C=C1)N=NC1=CC=CC=C1	9.88	-7	2.86	2.86	-9.88	-7.1	1.41e-06	0.000162574	3.41	0	0.0894558	0.538198	-1.01945	1.7006e-05	2.55556	2.16378	2.23593	2.13	2.23593	5	4	0.105934				14	15
Dipropyl 2,5-pyridinedicarboxylate	DPPL	-3.13945	-2.10393	-2.24475	0.397087	-223.768	16.6598	-23.12	82.3688	-28.4025	-16.7159	8.0929	10.373	45	25	70	DTXSID8032544	CCCOC(=O)C1=CC=C(N=C1)C(=O)OCCC	8.92	-5.73	3.37	3.42	-8.92	-5.61	2.12e-05	0.00276899	3.22	0	0.655112	0.287164	-0.86002	0.00028965	2.55556	2.63811	2.53332	2.78	2.53332	1	5	0.246675
Sulfamethazine	SUL	-3.73178	-2.31017	-2.47765	0.440205	-212.074	37.1091	-6.08981	90.4758	-53.3992	-37.8955	11.7311	4.055	60	13.7	73.7	DTXSID6021290	CC1=CC(C)=NC(NS(=O)(=O)C2=CC=C(N)C=C2)=N1	14.47	-14.69	0.29	1.08	-14.47	-14.1	8.56e-10	0.00431954	0.19	0	0.50565	0.589825	-1.0349	0.000451845	2.55556	2.61658	2.56333	2.61	2.56333	2	5	0.04667				-3	-4
Pyrimethamine	PYRA	-3.76982	-2.48428	-2.70934	0.495674	87.4885	237.597	208.584	69.0459	-38.1613	-22.1267	12.0511	8.267	56.6	20.475	77.075	DTXSID9021217	CCC1=NC(N)=NC(N)=C1C1=CC=C(Cl)C=C1	12.15	-11.3	1.75	2.66	-12.15	-10.39	1.32e-08	0.000394892	1.44	1	0.530611	0.65304	-1.0274	4.13076e-05	2.55556	2.71185	2.71669	3	2.71669	3	5	0.283308				14	13
Fluazifop-butyl	FLZ	-4.67256	-3.27531	-3.49302	0.531297	-186.993	11.9823	-28.6363	81.8973	-26.6721	-14.9339	8.23996	13.933	45	36.672	81.672	DTXSID3034612	CCCCOC(=O)C(C)OC1=CC=C(OC2=CC=C(C=N2)C(F)(F)F)C=C1	11.27	-7.34	4.62	4.59	-11.27	-7.02	4.12e-07	2.76e-06	4.5	0	0.844948	0.325579	-1.07914	2.88709e-07	2.55556	2.64694	2.59273	2.79	2.59273	4	5	0.197275
Ilepatril	ILE	-4.36299	-2.96203	-3.17368	0.570824	-460.716	3.85142	-69.4297	169.501	-50.1728	-28.5213	15.0769	7.283	61	20.8	81.8	DTXSID7047356	CC(C)[C@H](SC(C)=O)C(=O)N[C@H]1CC2=C(C=CC=C2)[C@H]2CCC[C@H](N2C1=O)C(O)=O	21.1	-19.29	2.66	3.36	-21.1	-18.6	3.49e-10	0.00257684	1.07	-1	0.927568	0.563849	-2.07267	0.00026955	2.55556	1.97457	1.84212	2.04	1.84212	5	5	0.197885
Caffeine	CAF	-2.55202	-1.47673	-1.70342	0.425109	-201.376	-16.463	-47.9279	71.5165	-42.2426	-25.3746	11.6585	4.091	47.5	35.3	82.8	DTXSID0020232	CN1C=NC2=C1C(=O)N(C)C(=O)N2C	9.58	-9.44	0	0.08	-9.58	-9.59	2.06e-06	0.111749	-0.07	0	0.120047	0.403612	-0.937449	0.0116895	2.55556	2.15346	2.16534	1.87	2.16534	1	6	0.295336
Boscalid	BOS	-4.33707	-2.72118	-2.91432	0.51589	-142.328	45.4913	11.2805	85.0208	-32.6366	-21.4258	8.40299	9.802	55	28.7	83.7	DTXSID6034392	ClC1=CC=C(C=C1)C1=C(NC(=O)C2=C(Cl)N=CC=C2)C=CC=C1	13.91	-9.65	5.11	5.36	-13.91	-9.16	1.17e-09	1.06e-05	2.96	0	0.641045	0.427733	-1.33084	1.10881e-06	2.55556	2.2935	2.23315	2.2	2.23315	2	6	0.0331513
CP-457920	CP4	-3.89772	-2.49621	-2.73558	0.569947	-32.278	170.633	121.391	94.3348	-36.9156	-17.5731	13.578	9.097	45	50.8	95.8	DTXSID4047254	CCOC1=NC2=C(NC=C(C(=O)NCC3=CC=CC=C3)C2=O)C=C1	17.26	-15.73	1.97	2.12	-17.26	-15.66	4.7e-07	2.08e-05	1.12	0	0.655343	0.563344	-1.3255	2.17578e-06	2.55556	2.44875	2.62726	2.45	2.62726	3	6	0.177265
Azoxystrobin	AZO	-4.77726	-3.48136	-3.67954	0.569998	-206.4	19.927	-31.7705	98.2671	-44.092	-28.8249	11.4304	9.387	79	32.6	111.6	DTXSID0032520	CO\C=C(\C(=O)OC)C1=CC=CC=C1OC1=CC(OC2=CC=CC=C2C#N)=NC=N1	16.05	-14.56	2.55	2.92	-16.05	-13.91	8.33e-13	1.57e-05	2.5	0	1.19501	0.580338	-1.32684	1.6423e-06	2.55556	3.00407	3.02802	3.08	3.02802	4	6	0.0519833
Furalaxyl	FUX	2.25286	19.3674	16.3259	9.0816	-519.624	-270.29	-306.247	93.0509	-34.6679	-22.9676	8.85549	9.362	66.5	46.3	112.8	DTXSID4047543	COC(=O)C(C)N(C(=O)C1=CC=CO1)C1=C(C)C=CC=C1C	10.72	-9.4	2.34	3.05	-10.72	-8.45	5.23e-07	0.000748359	2.61	0	1.28546	0.467217	-1.29883	7.8282e-05	2.55556	3.00948	13.0746	3		5	6
Imazaquin	IMQ	-3.71538	-2.50672	-2.70413	0.473043	-207.725	27.4425	-12.2439	88.116	-44.0445	-24.2674	14.9316	4.614	69	53.2	122.2	DTXSID3024152	CC(C)C1(C)N=C(NC1=O)C1=NC2=C(C=CC=C2)C=C1C(O)=O	15.87	-13.63	2.92	3.52	-15.87	-13.07	1.71e-10	0.00301365	1.13	-1	0.642761	0.835289	-1.087	0.000315242	2.55556	2.94692	2.87083	3.03	2.87083	1	7	0.159168
Loratadine	LOR	-4.19018	-2.80865	-3.0164	0.482888	-62.1422	222.742	186.523	88.788	-28.5098	-17.544	9.51618	13.235	99.5	30.7	130.2	DTXSID2023224	CCOC(=O)N1CCC(CC1)=C1C2=C(CCC3=C1N=CC=C3)C=C(Cl)C=C2	13.85	-8.86	5.88	5.65	-13.85	-8.62	3.61e-10	8.16e-06	5.2	0	0.607856	0.781847	-0.812995	8.53576e-07	2.55556	3.13227	3.09181	3.14	3.09181	2	7	0.0481897
Thiabendazole	THIA	-3.35848	-1.94423	-2.20762	0.580135	-115.087	72.9719	48.6384	60.9654	-33.2399	-16.7148	11.7347	6.355	95	43	138	DTXSID0021337	N1C2=C(C=CC=C2)N=C1C1=CSC=N1	11.24	-10.02	1.48	2.01	-11.24	-9.69	4.04e-09	0.0002519	2.35	0	0.410521	0.511114	-0.630582	2.635e-05	2.55556	2.84664	2.70786	3.17	2.70786	3	7	0.462139
Corticosterone	COR	-3.28972	-2.1863	-2.32225	0.421825	-198.507	65.6816	25.2714	100.411	-35.9713	-19.1179	11.4809	8.796	98.8	42.7	141.5	DTXSID6022474	C[C@]12C[C@H](O)[C@H]3[C@@H](CCC4=CC(=O)CC[C@]34C)[C@@H]1CC[C@@H]2C(=O)CO	17.46	-16.1	1.88	2.19	-17.46	-15.82	2.6e-09	0.000573392	1.94	0	0.750663	0.381801	-1.31767	5.99796e-05	2.55556	2.37041	2.32488	2.28	2.32488	4	7	0.044879
Carbimazole	CRL	-3.77482	-2.11077	-2.35666	0.558769	-178.718	29.6087	-2.67713	79.618	-45.2981	-30.9452	10.0293	4.293	121	23	144	DTXSID9022736	CCOC(=O)N1C=CN(C)C1=S	8.47	-9.37	-0.78	-0.21	-8.47	-9.02	0.000783272	0.00409703	0.01	0	0.327753	0.337255	-1.05406	0.000428569	2.55556	2.16694	2.14722	1.94	2.14722	5	7	0.20722
Fuberidazole	FUB	-3.41969	-2.02466	-2.18881	0.411354	-46.4109	126.834	95.8821	70.1612	-28.9849	-15.6336	10.4249	6.631	108	43.1	151.1	DTXSID4041995	N1C2=CC=CC=C2N=C1C1=CC=CO1	9.43	-6.74	2.94	3.33	-9.43	-6.45	4.86e-07	0.000392213	2.65	0	0.358818	0.659924	-0.930536	4.10274e-05	2.55556	2.64381	2.73846	2.55	2.73846	1	8	0.188456
Tebufenpyrad	TBFD	-4.49044	-3.11682	-3.35449	0.53147	60.0604	183.666	161.793	52.1251	-25.7633	-16.6409	6.92629	14.042	96.5	66.455	162.955	DTXSID0034223	CCC1=NN(C)C(C(=O)NCC2=CC=C(C=C2)C(C)(C)C)=C1Cl	13.92	-10.38	4.2	4.72	-13.92	-9.73	9e-07	7.53e-06	4.59	0	0.71364	0.375032	-0.714025	7.87675e-07	2.55556	2.93021	2.98592	2.72	2.98592	2	8	0.265918
Tetraconazole	TTC	-3.95989	-2.64867	-2.97477	0.608736	-281.146	-77.4512	-103.462	77.8509	-29.6798	-18.3431	8.84149	10.886	96.3	94.2	190.5	DTXSID8034956	FC(F)C(F)(F)OCC(CN1C=NC=N1)C1=C(Cl)C=C(Cl)C=C1	10.34	-8.43	2.6	3.3	-10.34	-7.62	1.35e-06	0.000416843	3.55	0	0.440183	0.538196	-1.13317	4.36038e-05	2.55556	2.40081	2.24792	2.45	2.24792	3	8	0.202084
Fluoxastrobin	FLX	-4.82653	-3.25493	-3.52093	0.592812	-267.821	42.0277	-9.21975	105.906	-21.3284	-12.0154	7.33043	10.725	148.4	65.035	213.435	DTXSID2034625	CO\N=C(\C1=NOCCO1)C1=C(OC2=NC=NC(OC3=CC=CC=C3Cl)=C2F)C=CC=C1	15.94	-12.66	4.18	3.44	-15.94	-12.9	1.3e-10	5.01e-06	4.01	0	0.708532	0.471949	-1.09494	5.2407e-07	2.55556	2.6411	2.51315	2.86	2.51315	4	8	0.346846
Aldoxycarb	ALD	-2.98617	-1.83142	-2.03098	0.419689	-357.576	-100.86	-159.378	115.514	-41.9601	-25.4715	11.2145	3.297	148	66.6	214.6	DTXSID6023862	CNC(=O)ON=CC(C)(C)S(C)(=O)=O	10.43	-12.06	-1.53	-0.44	-10.43	-11.36	8.8e-05	0.0210245	-0.57	0	0.291235	0.342878	-1.67716	0.00219927	2.55556	1.51471	1.31818	1.75	1.31818	5	8	0.431823
Dicrotophos	DCHP	-3.84159	-2.36952	-2.53413	0.509358	-147.106	30.8233	-5.42583	79.6892	-57.3765	-40.0517	12.0881	4.448	163.9	57.2	221.1	DTXSID9023914	COP(=O)(OC)O\C(C)=C\C(=O)N(C)C	9.45	-9.46	-0.08	0.41	-9.45	-9.21	0.00015999	4.20595	-1.07	0	0.750722	0.39195	-1.18245	0.439963	2.55556	2.95574	-2.62442	2.97		1	9
Carbamazepine	CARB	-3.36505	-2.26658	-2.49445	0.472587	-31.5004	156.392	129.953	72.8932	-36.3263	-21.6699	11.3351	7.473	156	142.1	298.1	DTXSID4022731	NC(=O)N1C2=CC=CC=C2C=CC2=C1C=CC=C2	12.14	-10.56	2.22	2.48	-12.14	-10.25	6.27e-10	0.000490347	1.88	0	0.482656	0.677812	-0.99127	5.12927e-05	2.55556	2.72481	2.65647	2.91	2.65647	2	9	0.25353
Glybenclamide	GLY	-5.76289	-4.37987	-4.62751	0.59527	-602.004	-190.326	-280.623	168.754	-57.9536	-38.2303	15.2171	9.464	205	104.8	309.8	DTXSID0037237	COC1=C(C=C(Cl)C=C1)C(=O)NCCC1=CC=C(C=C1)S(=O)(=O)NC(=O)NC1CCCCC1	22.5	-19.05	4.34	4.91	-22.5	-18.39	9.29e-10	8.12e-06	1.63	0	1.22513	0.867627	-2.17885	8.49392e-07	2.55556	2.46946	2.83401	1.97	2.83401	3	9	0.864015
2-Amino-6-methoxybenzothiazole	2AM6	-3.24483	-1.97438	-2.16691	0.478252	-108.695	49.9818	18.0561	73.1367	-34.1954	-21.0932	9.57469	5.878	224.5	91.3	315.8	DTXSID9024485	COC1=CC2=C(C=C1)N=C(N)S2	9.17	-8.23	1.18	1.62	-9.17	-7.93	1.23e-06	0.000381362	2.19	0	0.505929	0.448476	-1.1253	3.98923e-05	2.55556	2.3847	2.37727	2.85	2.37727	4	9	0.472734
CI-1044	CL10	-5.24281	-3.69113	-3.97017	0.600461	-176.471	60.8406	26.6367	92.6452	-67.1522	-46.3279	14.6903	6.282	205	157.2	362.2	DTXSID5047291	NC1=CC2=C3N(CCC3=C1)C(=O)[C@H](NC(=O)C1=CC=CN=C1)N=C2C1=CC=CC=C1	19.82	-19.3	1.85	1.88	-19.82	-18.96	4.28e-10	2.38e-06	1.97	0	0.79871	0.521403	-1.29567	2.4896e-07	2.55556	2.58001	2.28896	2.85	2.28896	5	9	0.561039
Dinotefuran	DINO	-2.50848	-1.49099	-1.6601	0.406445	-189.773	54.6153	30.1772	80.6913	-45.795	-28.9391	11.1465	3.076	292	106.3	398.3	DTXSID7034549	CNC(NCC1CCOC1)=N[N+]([O-])=O	9.97	-10.25	-0.28	0.11	-9.97	-10.13	4.58e-07	0.195741	-0.69	1	0.386484	0.253588	-0.977429	0.0204755	2.55556	2.23868	2.23868	1.9	2.23868	1	10	0.338677
Thiamethoxam	THIX	-3.95161	-2.41797	-2.68949	0.588907	-291.617	-85.4072	-121.61	85.1481	-58.3595	-41.6218	11.5466	3.927	292	106.4	398.4	DTXSID2034962	CN1COCN(CC2=CN=C(Cl)S2)C1=N[N+]([O-])=O	11.17	-11.71	-0.09	0.22	-11.17	-11.43	1.54e-06	0.01393	-1.28	1	0.460404	0.331875	-1.23256	0.00145715	2.55556	2.11673	2.11673	1.87	2.11673	2	10	0.246734
Tebufenozide	TBF	-5.15931	-3.19763	-3.54688	0.752874	-104.579	112.436	77.7549	84.6091	-33.7478	-20.3803	9.25248	11.491	287.5	117.6	405.1	DTXSID4034948	CCC1=CC=C(C=C1)C(=O)NN(C(=O)C1=CC(C)=CC(C)=C1)C(C)(C)C	14.14	-9.34	6.01	6.56	-14.14	-8.39	2.24e-08	2.34e-06	4.25	0	0.606068	0.322438	-1.12039	2.44775e-07	2.55556	2.36368	2.36368	2.25	2.36368	3	10	0.113675

## Sheet: yrand
Chemical name	Chem	LJ p1	LJ p2	LJ p3	LJ std	Coul p1	Coul p2	Coul p3	Coul std	W LJ p2	W LJ p3	W LJ std	RT	Param penalty	Charge penalty	Total	DTXSID	SMILES	log Kma	log Kaw	logKow	logKmw	logKam	logKaw	VP	Sw	logD5	Native Charge	log RRF	H LJ	W LJ	H Coul	SW	const	calc log RRF	calc log RRF y1	calc log RRF y2	calc log RRF y3	calc log RRF y4	calc log RRF y5	calc log RRF yav	AE	MAE	R2			coef
4-(3-Phenylpropyl)pyridine	43PP	-3.24298	-2.07349	-2.22881	0.427673	-3.06968	145.729	121.707	60.3382	-20.0894	-9.87059	7.65158	10.952	0	0	0	DTXSID5044869	C(CC1=CC=CC=C1)CC1=CC=NC=C1	7.91	-4.65	3.61	3.57	-7.91	-4.54	0.0027234	6.68e-06	2.87	1	2.58	-4.01403	2.30409	0.946913	-1.09936e-06	2.35632	1.59329	-1.63488	0.591748	-2.7033	-1.74216	1.59329	-0.779061	3.35906	4.34541	0.028724		const	2.35632
4-Acetylaminophenylacetic acid	ACT	-3.28125	-2.08457	-2.27008	0.457439	-153.701	19.2334	-10.8744	78.059	-40.7907	-21.8914	12.5278	1.912	0	0	0	DTXSID0020020	CC(=O)NC1=CC=C(CC(O)=O)C=C1	13.06	-12.61	0.32	1.21	-13.06	-12.26	2.16e-06	0.00185273	1.08	-1	1.89	-4.07986	4.71722	-0.516892	-0.000304912	2.35632	2.47648	-3.97811	-3.21638	-5.09963	0.623989	2.47648	-1.83873	3.72873				LJ p1	0.23435
Cinchophen	CIN	-3.54691	-2.19092	-2.40933	0.531233	-127.006	45.3061	10.2474	95.2556	-13.3274	-0.9885	8.50478	15.657	0.5	0.2	0.7	DTXSID0040705	OC(=O)C1=C2C=CC=CC2=NC(=C1)C1=CC=CC=C1	12.15	-8.69	3.95	4.03	-12.15	-8.52	3.5e-09	0.000641245	3.42	-1	1.73	-4.39109	1.15222	-0.352328	-0.000105532	2.35632	-1.23498	-3.74546	2.6386	-0.522883	-2.5586	-1.23498	-1.08467	2.81467				LJ p2	1.48428
N-Ethyl-4-menthane-3-carboxamide	NEM	-2.60657	-1.66901	-1.8107	0.341423	24.2772	158.986	135.431	52.0174	-25.2629	-13.3666	9.47849	10.645	0.6	0.519	1.119	DTXSID5047039	CCNC(=O)C1CC(C)CCC1C(C)C	8.14	-3.76	4.72	4.92	-8.14	-3.43	0.000943903	0.00414768	2.44	0	3.03	-3.22117	2.98259	1.14057	-0.000682602	2.35632	3.25762	-0.556114	-0.881678	-3.47843	-0.143959	3.25762	-0.360511	3.39051				LJ p3	-0.24734
N,N'-Dibutylthiourea	NND	-3.21176	-2.08737	-2.2914	0.447813	58.0607	270.733	238.878	84.8314	-36.0218	-20.4694	10.7804	8.105	1	0.6	1.6	DTXSID8042187	CCCCNC(=S)NCCCC	8.35	-6.24	2.41	2.61	-8.35	-6.01	0.0386665	0.043122	1.69	0	1.88	-4.04609	4.26205	2.02717	-0.00709677	2.35632	4.59235	-1.03456	-2.31318	-5.9949	-0.326064	4.59235	-1.01527	2.89527				LJ std	-1.70143
Diuron	DIU	-3.45836	-2.03753	-2.25934	0.500538	-133.36	53.6558	19.6381	78.227	-33.0375	-20.2481	9.11199	8.425	1	0.6	1.6	DTXSID0020446	CN(C)C(=O)NC1=CC(Cl)=C(Cl)C=C1	10.54	-8.15	2.4	2.56	-10.54	-8.14	6.92e-08	0.000173803	2.68	0	2.52	-4.12755	4.01497	-0.196693	-2.86035e-05	2.35632	2.04702	-3.19499	-2.06472	-4.30303	-0.1049	2.04702	-1.52413	4.04413				Coul p1	0.00103511
4-Chlorophenylurea	4CHL	-2.83136	-1.71348	-1.89099	0.393588	-128.57	66.6197	35.1217	85.2973	-25.4318	-11.0802	9.89136	5.953	1	0.6	1.6	DTXSID5041512	NC(=O)NC1=CC=C(Cl)C=C1	9.88	-8.41	1.44	1.87	-9.88	-8.3	3.65e-05	0.0106003	1.8	0	1.88	-3.40876	2.79015	-0.0863978	-0.00174454	2.35632	1.64957	-2.35021	-0.445078	-2.56557	0.103011	1.64957	-0.721656	2.60166				Coul p2	0.00327916
N-Butyl-p-toluenesulfonamide	NBPT	-3.34659	-1.99016	-2.18417	0.49271	-161.476	28.6812	-7.9777	88.8981	-29.1874	-18.1149	8.16034	8.775	0.9	0.766	1.666	DTXSID7042198	CCCCNS(=O)(=O)C1=CC=C(C)C=C1	9.06	-7.01	2.35	2.64	-9.06	-6.71	9.18e-07	0.00669955	2.51	0	2.45	-4.03631	3.57394	-0.525388	-0.00110257	2.35632	1.36746	-3.49126	-1.42155	-3.61016	-0.0998307	1.36746	-1.45107	3.90107				Coul p3	0.00612961
Laurocapram	LAU	-3.96008	-2.70012	-2.86276	0.468695	27.6507	264.524	232.133	86.6178	-16.2986	-7.98175	6.47953	16.89	0.9	1.1	2	DTXSID0042086	CCCCCCCCCCCCN1CCCCCC1=O	10.32	-4.1	6.48	6.12	-10.32	-4.15	7.06e-06	0.000303456	5.73	0	2.6	-5.02516	1.87935	1.92588	-4.99411e-05	2.35632	1.13634	-1.72583	1.84545	-3.0219	-3.70049	1.13634	-1.09328	3.69328				Coul std	-0.00453769
N-Phenyldiethanolamine	NNP	-0.456924	-0.006627	-0.017877	0.0807382	-71.3764	0.726161	0.157415	11.9904	-28.2707	-12.0279	11.246	5.6	4	3.4	7.4	DTXSID5021962	OCCN(CCO)C1=CC=CC=C1	11.15	-11.02	0.24	0.87	-11.15	-10.7	4.46e-05	0.184424	0.97	0	2.87	-0.249865	3.08537	-0.124945	-0.0303515	2.35632	5.03653	1.55155	-2.68468	-2.00754	4.63574	5.03653	1.30632	1.56368				W LJ p2	-0.0498259
Diphenylacetonitrile	DACN	-3.46023	-2.02401	-2.26743	0.491691	-103.881	38.0224	18.3374	56.7663	-32.2824	-21.7459	8.18723	7.481	4	7.7	11.7	DTXSID4020539	N#CC(C1=CC=CC=C1)C1=CC=CC=C1	8.48	-6.39	2.55	3.08	-8.48	-5.83	0.000198568	0.00111939	3	0	1.97	-4.09086	4.07867	-0.128034	-0.000184223	2.35632	2.21591	-3.00019	-2.12664	-4.43724	-0.0636966	2.21591	-1.48237	3.45237				W LJ p3	-0.0961911
N-(2,4-Dimethylphenyl)acetamide	NMD	-2.96463	-1.874	-2.03836	0.411927	-119.907	61.6689	30.1895	75.1832	-36.706	-24.2338	9.09945	6.083	0	27.149	27.149	DTXSID0044868	CC(=O)NC1=CC=C(C)C=C1C	8.37	-6.97	1.52	1.89	-8.37	-6.75	3.11e-06	0.019369	1.47	0	2.83	-3.673	4.58056	-0.0780038	-0.00318764	2.35632	3.18269	-2.65945	-3.21302	-5.15446	1.01177	3.18269	-1.36649	4.19649				W LJ std	0.0462196
Nuarimol	NUA	-4.78088	-2.83275	-3.11032	0.664611	-175.432	22.7551	-12.1282	85.7089	-29.4372	-14.5629	10.4778	9.455	8	29.7	37.7	DTXSID2042220	OC(C1=CC=C(F)C=C1)(C1=CN=CN=C1)C1=CC=CC=C1Cl	12.96	-10.91	2.75	3.33	-12.96	-10.27	3.37e-09	8.29e-05	3.18	0	2.26	-5.68649	3.35183	-0.570237	-1.36432e-05	2.35632	-0.548585	-5.49352	-0.229686	-3.46759	-2.88737	-0.548585	-2.52535	4.78535				Sw	-0.164574
Dibutyl phthalate	DBP	-3.55203	-2.38291	-2.60214	0.414903	-91.797	109.828	76.039	73.017	-11.7685	-4.86631	6.11992	19.511	45	0.5	45.5	DTXSID2021781	CCCCOC(=O)C1=CC=CC=C1C(=O)OCCCC	9.61	-5.35	4.53	4.44	-9.61	-5.26	2.02e-05	4.01e-05	4.61	0	2.6	-4.43165	1.33733	0.399885	-6.59943e-06	2.35632	-0.338116	-2.2855	2.28748	-1.10195	-2.96642	-0.338116	-0.880901	3.4809
Diisobutyl phthalate	DIP	-3.39122	-2.29522	-2.42039	0.424875	-96.9415	91.5221	60.3544	78.9401	-11.4801	-3.93684	6.08924	19.511	45	0.5	45.5	DTXSID9022522	CC(C)COC(=O)C1=C(C=CC=C1)C(=O)OCC(C)C	9.03	-4.48	4.94	4.82	-9.03	-4.34	3.72e-05	2.22e-05	4.11	0	2.6	-4.32572	1.23214	0.211513	-3.65355e-06	2.35632	-0.525751	-2.683	2.35118	-1.01961	-2.73126	-0.525751	-0.921687	3.52169				x	y
Dicyclohexyl phthalate	DCP	-3.98669	-2.54607	-2.7839	0.534348	-10.5503	172.976	137.214	80.4413	-28.5586	-17.7397	8.08349	11.739	45	0.8	45.8	DTXSID5025021	O=C(OC1CCCCC1)C1=C(C=CC=C1)C(=O)OC1CCCCC1	11.87	-6.59	5.75	5.5	-11.87	-6.53	8.7e-07	1.2e-05	5.83	0	2.14	-4.93395	3.50298	1.03235	-1.97489e-06	2.35632	1.95769	-2.75846	-0.759828	-4.5914	-2.09765	1.95769	-1.64993	3.78993				-2	-2
Cladribine	CLA	-3.37826	-2.21368	-2.39425	0.42711	-179.996	37.3568	3.03414	99.9986	-43.5838	-21.9903	14.6075	3.77	20	30.6	50.6	DTXSID8022828	NC1=NC(Cl)=NC2=C1N=CN2[C@H]1C[C@H](O)[C@@H](CO)O1	17.48	-19.6	-1.95	-1.35	-17.48	-19.46	3.91e-10	0.0218731	-0.02	0	1.86	-4.21193	4.96203	-0.498983	-0.00359975	2.35632	2.60384	-4.43846	-3.44472	-5.49218	0.833446	2.60384	-1.98762	3.84762				6	6
Warfarin	WAR	-4.35527	-2.95675	-3.25215	0.664767	-297.898	-61.7677	-111.558	108.462	-49.065	-32.5962	12.9086	6.168	30	22.5	52.5	DTXSID5023742	CC(=O)CC(C1=CC=CC=C1)C1=C(O)C2=CC=CC=C2OC1=O	15.07	-13.12	2.29	2.4	-15.07	-13.04	1.15e-07	9.62e-05	2.7	0	2.4	-5.73597	6.1768	-1.68688	-1.58321e-05	2.35632	1.11025	-7.27351	-4.82938	-6.95089	-0.300983	1.11025	-3.6489	6.0489
Deethylatrazine	DEE	-2.57574	-1.63635	-1.80638	0.378107	-28.9487	87.6779	66.902	49.2695	-32.2737	-20.6503	7.91497	5.607	22	32.4	54.4	DTXSID5037494	CC(C)NC1=NC(Cl)=NC(N)=N1	8.78	-8.55	0.46	0.91	-8.78	-8.26	6.17e-09	0.00571496	1.49	0	2.21	-3.22896	3.96027	0.444058	-0.000940536	2.35632	3.53074	-1.41018	-2.43467	-4.49922	0.869978	3.53074	-0.788669	2.99867				-2	-1
4-Aminoazobenzene	4AMI	-3.55332	-2.12077	-2.46364	0.594001	16.7211	149.268	126.384	62.7085	-29.1048	-17.3426	9.07472	9.147	0	59.7	59.7	DTXSID6024460	NC1=CC=C(C=C1)N=NC1=CC=CC=C1	9.88	-7	2.86	2.86	-9.88	-7.1	1.41e-06	0.000162574	3.41	0	2.13	-4.38183	3.5378	0.996917	-2.67555e-05	2.35632	2.50917	-2.23755	-1.00185	-4.43854	-1.23644	2.50917	-1.28104	3.41104				6	7
Dipropyl 2,5-pyridinedicarboxylate	DPPL	-3.13945	-2.10393	-2.24475	0.397087	-223.768	16.6598	-23.12	82.3688	-28.4025	-16.7159	8.0929	10.373	45	25	70	DTXSID8032544	CCCOC(=O)C1=CC=C(N=C1)C(=O)OCCC	8.92	-5.73	3.37	3.42	-8.92	-5.61	2.12e-05	0.00276899	3.22	0	2.78	-3.97896	3.39715	-0.692476	-0.000455705	2.35632	1.08158	-3.30504	-1.38295	-3.20463	-0.316646	1.08158	-1.42553	4.20553
Sulfamethazine	SUL	-3.73178	-2.31017	-2.47765	0.440205	-212.074	37.1091	-6.08981	90.4758	-53.3992	-37.8955	11.7311	4.055	60	13.7	73.7	DTXSID6021290	CC1=CC(C)=NC(NS(=O)(=O)C2=CC=C(N)C=C2)=N1	14.47	-14.69	0.29	1.08	-14.47	-14.1	8.56e-10	0.00431954	0.19	0	2.61	-4.43964	6.84808	-0.545713	-0.000710885	2.35632	4.21833	-4.21189	-6.44904	-7.98856	1.79308	4.21833	-2.52762	5.13762				-2	-3
Pyrimethamine	PYRA	-3.76982	-2.48428	-2.70934	0.495674	87.4885	237.597	208.584	69.0459	-38.1613	-22.1267	12.0511	8.267	56.6	20.475	77.075	DTXSID9021217	CCC1=NC(N)=NC(N)=C1C1=CC=C(Cl)C=C1	12.15	-11.3	1.75	2.66	-12.15	-10.39	1.32e-08	0.000394892	1.44	1	3	-4.74406	4.58681	1.83491	-6.49891e-05	2.35632	4.03392	-2.09643	-2.49034	-6.44605	-1.25807	4.03392	-1.65139	4.65139				6	5
Fluazifop-butyl	FLZ	-4.67256	-3.27531	-3.49302	0.531297	-186.993	11.9823	-28.6363	81.8973	-26.6721	-14.9339	8.23996	13.933	45	36.672	81.672	DTXSID3034612	CCCCOC(=O)C(C)OC1=CC=C(OC2=CC=C(C=N2)C(F)(F)F)C=C1	11.27	-7.34	4.62	4.59	-11.27	-7.02	4.12e-07	2.76e-06	4.5	0	2.79	-5.9965	3.14632	-0.701421	-4.54225e-07	2.35632	-1.19528	-5.74921	0.0967291	-3.36522	-3.63811	-1.19528	-2.77022	5.56022
Ilepatril	ILE	-4.36299	-2.96203	-3.17368	0.570824	-460.716	3.85142	-69.4297	169.501	-50.1728	-28.5213	15.0769	7.283	61	20.8	81.8	DTXSID7047356	CC(C)[C@H](SC(C)=O)C(=O)N[C@H]1CC2=C(C=CC=C2)[C@H]2CCC[C@H](N2C1=O)C(O)=O	21.1	-19.29	2.66	3.36	-21.1	-18.6	3.49e-10	0.00257684	1.07	-1	2.04	-5.6052	5.94024	-1.65898	-0.000424082	2.35632	1.03196	-7.18416	-4.56609	-6.46869	0.0803115	1.03196	-3.42133	5.46133
Caffeine	CAF	-2.55202	-1.47673	-1.70342	0.425109	-201.376	-16.463	-47.9279	71.5165	-42.2426	-25.3746	11.6585	4.091	47.5	35.3	82.8	DTXSID0020232	CN1C=NC2=C1C(=O)N(C)C(=O)N2C	9.58	-9.44	0	0.08	-9.58	-9.59	2.06e-06	0.111749	-0.07	0	1.87	-3.09191	5.08444	-0.880731	-0.018391	2.35632	3.44972	-2.91625	-4.35937	-5.06623	2.45478	3.44972	-1.28747	3.15747
Boscalid	BOS	-4.33707	-2.72118	-2.91432	0.51589	-142.328	45.4913	11.2805	85.0208	-32.6366	-21.4258	8.40299	9.802	55	28.7	83.7	DTXSID6034392	ClC1=CC=C(C=C1)C1=C(NC(=O)C2=C(Cl)N=CC=C2)C=CC=C1	13.91	-9.65	5.11	5.36	-13.91	-9.16	1.17e-09	1.06e-05	2.96	0	2.2	-5.21232	4.07551	-0.314805	-1.74449e-06	2.35632	0.904703	-4.66448	-1.57577	-4.65918	-1.59023	0.904703	-2.31699	4.51699
CP-457920	CP4	-3.89772	-2.49621	-2.73558	0.569947	-32.278	170.633	121.391	94.3348	-36.9156	-17.5731	13.578	9.097	45	50.8	95.8	DTXSID4047254	CCOC1=NC2=C(NC=C(C(=O)NCC3=CC=CC=C3)C2=O)C=C1	17.26	-15.73	1.97	2.12	-17.26	-15.66	4.7e-07	2.08e-05	1.12	0	2.45	-4.91162	4.1573	0.842137	-3.42315e-06	2.35632	2.44413	-3.34034	-1.89719	-5.22419	-1.59052	2.44413	-1.92162	4.37162
Azoxystrobin	AZO	-4.77726	-3.48136	-3.67954	0.569998	-206.4	19.927	-31.7705	98.2671	-44.092	-28.8249	11.4304	9.387	79	32.6	111.6	DTXSID0032520	CO\C=C(\C(=O)OC)C1=CC=CC=C1OC1=CC(OC2=CC=CC=C2C#N)=NC=N1	16.05	-14.56	2.55	2.92	-16.05	-13.91	8.33e-13	1.57e-05	2.5	0	3.08	-6.34658	5.49793	-0.78895	-2.58382e-06	2.35632	0.718715	-6.75718	-3.50565	-6.69927	-2.2392	0.718715	-3.69652	6.77652
Furalaxyl	FUX	2.25286	19.3674	16.3259	9.0816	-519.624	-270.29	-306.247	93.0509	-34.6679	-22.9676	8.85549	9.362	66.5	46.3	112.8	DTXSID4047543	COC(=O)C(C)N(C(=O)C1=CC=CO1)C1=C(C)C=CC=C1C	10.72	-9.4	2.34	3.05	-10.72	-8.45	5.23e-07	0.000748359	2.61	0	3	9.78486	4.34593	-3.7236	-0.000123161	2.35632	12.7634	9.53497	-11.4453	2.63692	22.5979	12.7634	7.21758	4.21758
Imazaquin	IMQ	-3.71538	-2.50672	-2.70413	0.473043	-207.725	27.4425	-12.2439	88.116	-44.0445	-24.2674	14.9316	4.614	69	53.2	122.2	DTXSID3024152	CC(C)C1(C)N=C(NC1=O)C1=NC2=C(C=CC=C2)C=C1C(O)=O	15.87	-13.63	2.92	3.52	-15.87	-13.07	1.71e-10	0.00301365	1.13	-1	3.03	-4.72738	5.21899	-0.599924	-0.000495969	2.35632	2.24751	-4.77652	-3.79038	-5.80502	-0.0142581	2.24751	-2.42773	5.45773
Loratadine	LOR	-4.19018	-2.80865	-3.0164	0.482888	-62.1422	222.742	186.523	88.788	-28.5098	-17.544	9.51618	13.235	99.5	30.7	130.2	DTXSID2023224	CCOC(=O)N1CCC(CC1)=C1C2=C(CCC3=C1N=CC=C3)C=C(Cl)C=C2	13.85	-8.86	5.88	5.65	-13.85	-8.62	3.61e-10	8.16e-06	5.2	0	3.14	-5.22632	3.54794	1.4065	-1.34293e-06	2.35632	2.08443	-2.58172	-0.744717	-4.86312	-2.5845	2.08443	-1.73792	4.87792
Thiabendazole	THIA	-3.35848	-1.94423	-2.20762	0.580135	-115.087	72.9719	48.6384	60.9654	-33.2399	-16.7148	11.7347	6.355	95	43	138	DTXSID0021337	N1C2=C(C=CC=C2)N=C1C1=CSC=N1	11.24	-10.02	1.48	2.01	-11.24	-9.69	4.04e-09	0.0002519	2.35	0	3.17	-4.11388	3.80639	0.14165	-4.14563e-05	2.35632	2.19044	-2.86469	-1.82083	-4.10928	-0.526343	2.19044	-1.42614	4.59614
Corticosterone	COR	-3.28972	-2.1863	-2.32225	0.421825	-198.507	65.6816	25.2714	100.411	-35.9713	-19.1179	11.4809	8.796	98.8	42.7	141.5	DTXSID6022474	C[C@]12C[C@H](O)[C@H]3[C@@H](CCC4=CC(=O)CC[C@]34C)[C@@H]1CC[C@@H]2C(=O)CO	17.46	-16.1	1.88	2.19	-17.46	-15.82	2.6e-09	0.000573392	1.94	0	2.28	-4.15935	4.16192	-0.290827	-9.43656e-05	2.35632	2.06796	-3.65633	-2.36837	-4.54187	0.113911	2.06796	-1.67694	3.95694
Carbimazole	CRL	-3.77482	-2.11077	-2.35666	0.558769	-178.718	29.6087	-2.67713	79.618	-45.2981	-30.9452	10.0293	4.293	121	23	144	DTXSID9022736	CCOC(=O)N1C=CN(C)C1=S	8.47	-9.37	-0.78	-0.21	-8.47	-9.02	0.000783272	0.00409703	0.01	0	1.94	-4.38541	5.69722	-0.465593	-0.000674266	2.35632	3.20186	-3.97	-4.57287	-6.45024	0.97398	3.20186	-2.16345	4.10345
Fuberidazole	FUB	-3.41969	-2.02466	-2.18881	0.411354	-46.4109	126.834	95.8821	70.1612	-28.9849	-15.6336	10.4249	6.631	108	43.1	151.1	DTXSID4041995	N1C2=CC=CC=C2N=C1C1=CC=CO1	9.43	-6.74	2.94	3.33	-9.43	-6.45	4.86e-07	0.000392213	2.65	0	2.55	-3.96508	3.42985	0.637218	-6.45482e-05	2.35632	2.45824	-2.05857	-1.16637	-3.85671	-0.646572	2.45824	-1.054	3.604
Tebufenpyrad	TBFD	-4.49044	-3.11682	-3.35449	0.53147	60.0604	183.666	161.793	52.1251	-25.7633	-16.6409	6.92629	14.042	96.5	66.455	162.955	DTXSID0034223	CCC1=NN(C)C(C(=O)NCC2=CC=C(C=C2)C(C)(C)C)=C1Cl	13.92	-10.38	4.2	4.72	-13.92	-9.73	9e-07	7.53e-06	4.59	0	2.72	-5.75314	3.20451	1.41964	-1.23924e-06	2.35632	1.22734	-3.17784	0.111736	-4.67493	-3.89667	1.22734	-2.08207	4.80207
Tetraconazole	TTC	-3.95989	-2.64867	-2.97477	0.608736	-281.146	-77.4512	-103.462	77.8509	-29.6798	-18.3431	8.84149	10.886	96.3	94.2	190.5	DTXSID8034956	FC(F)C(F)(F)OCC(CN1C=NC=N1)C1=C(Cl)C=C(Cl)C=C1	10.34	-8.43	2.6	3.3	-10.34	-7.62	1.35e-06	0.000416843	3.55	0	2.45	-5.15932	3.65192	-1.53244	-6.86017e-05	2.35632	-0.683589	-5.871	-1.07686	-3.44242	-1.51746	-0.683589	-2.51827	4.96827
Fluoxastrobin	FLX	-4.82653	-3.25493	-3.52093	0.592812	-267.821	42.0277	-9.21975	105.906	-21.3284	-12.0154	7.33043	10.725	148.4	65.035	213.435	DTXSID2034625	CO\N=C(\C1=NOCCO1)C1=C(OC2=NC=NC(OC3=CC=CC=C3Cl)=C2F)C=CC=C1	15.94	-12.66	4.18	3.44	-15.94	-12.9	1.3e-10	5.01e-06	4.01	0	2.86	-6.10009	2.55729	-0.676494	-8.24517e-07	2.35632	-1.86297	-5.53449	1.04352	-2.52179	-4.12536	-1.86297	-2.60022	5.46022
Aldoxycarb	ALD	-2.98617	-1.83142	-2.03098	0.419689	-357.576	-100.86	-159.378	115.514	-41.9601	-25.4715	11.2145	3.297	148	66.6	214.6	DTXSID6023862	CNC(=O)ON=CC(C)(C)S(C)(=O)=O	10.43	-12.06	-1.53	-0.44	-10.43	-11.36	8.8e-05	0.0210245	-0.57	0	1.75	-3.62988	5.05916	-2.20196	-0.00346009	2.35632	1.58018	-4.98394	-4.13517	-4.43395	2.1978	1.58018	-1.95502	3.70502
Dicrotophos	DCHP	-3.84159	-2.36952	-2.53413	0.509358	-147.106	30.8233	-5.42583	79.6892	-57.3765	-40.0517	12.0881	4.448	163.9	57.2	221.1	DTXSID9023914	COP(=O)(OC)O\C(C)=C\C(=O)N(C)C	9.45	-9.46	-0.08	0.41	-9.45	-9.21	0.00015999	4.20595	-1.07	0	2.97	-4.65715	7.27016	-0.44606	-0.692191	2.35632	3.83108	-4.30967	-7.3998	-8.86662	1.39959	3.83108	-3.06908	6.03908
Carbamazepine	CARB	-3.36505	-2.26658	-2.49445	0.472587	-31.5004	156.392	129.953	72.8932	-36.3263	-21.6699	11.3351	7.473	156	142.1	298.1	DTXSID4022731	NC(=O)N1C2=CC=CC=C2C=CC2=C1C=CC=C2	12.14	-10.56	2.22	2.48	-12.14	-10.25	6.27e-10	0.000490347	1.88	0	2.91	-4.33994	4.41834	0.946024	-8.06985e-05	2.35632	3.38066	-2.5078	-2.52211	-5.66884	-0.434863	3.38066	-1.55059	4.46059
Glybenclamide	GLY	-5.76289	-4.37987	-4.62751	0.59527	-602.004	-190.326	-280.623	168.754	-57.9536	-38.2303	15.2171	9.464	205	104.8	309.8	DTXSID0037237	COC1=C(C=C(Cl)C=C1)C(=O)NCCC1=CC=C(C=C1)S(=O)(=O)NC(=O)NC1CCCCC1	22.5	-19.05	4.34	4.91	-22.5	-18.39	9.29e-10	8.12e-06	1.63	0	1.97	-7.71973	7.26833	-3.73312	-1.33634e-06	2.35632	-1.8282	-11.7967	-5.83364	-7.66322	-1.76898	-1.8282	-5.77815	7.74815
2-Amino-6-methoxybenzothiazole	2AM6	-3.24483	-1.97438	-2.16691	0.478252	-108.695	49.9818	18.0561	73.1367	-34.1954	-21.0932	9.57469	5.878	224.5	91.3	315.8	DTXSID9024485	COC1=CC2=C(C=C1)N=C(N)S2	9.17	-8.23	1.18	1.62	-9.17	-7.93	1.23e-06	0.000381362	2.19	0	2.85	-3.96871	4.17533	-0.169808	-6.27624e-05	2.35632	2.39307	-3.10494	-2.41883	-4.57394	0.219412	2.39307	-1.49704	4.34704
CI-1044	CL10	-5.24281	-3.69113	-3.97017	0.600461	-176.471	60.8406	26.6367	92.6452	-67.1522	-46.3279	14.6903	6.282	205	157.2	362.2	DTXSID5047291	NC1=CC2=C3N(CCC3=C1)C(=O)[C@H](NC(=O)C1=CC=CN=C1)N=C2C1=CC=CC=C1	19.82	-19.3	1.85	1.88	-19.82	-18.96	4.28e-10	2.38e-06	1.97	0	2.85	-6.74699	8.48123	-0.240284	-3.91687e-07	2.35632	3.85027	-7.27625	-7.73019	-11.096	-0.413849	3.85027	-4.53321	7.38321
Dinotefuran	DINO	-2.50848	-1.49099	-1.6601	0.406445	-189.773	54.6153	30.1772	80.6913	-45.795	-28.9391	11.1465	3.076	292	106.3	398.3	DTXSID7034549	CNC(NCC1CCOC1)=N[N+]([O-])=O	9.97	-10.25	-0.28	0.11	-9.97	-10.13	4.58e-07	0.195741	-0.69	1	1.9	-3.08183	5.58065	-0.198522	-0.0322139	2.35632	4.6244	-2.38337	-5.09781	-6.26997	2.87955	4.6244	-1.24944	3.14944
Thiamethoxam	THIX	-3.95161	-2.41797	-2.68949	0.588907	-291.617	-85.4072	-121.61	85.1481	-58.3595	-41.6218	11.5466	3.927	292	106.4	398.4	DTXSID2034962	CN1COCN(CC2=CN=C(Cl)S2)C1=N[N+]([O-])=O	11.17	-11.71	-0.09	0.22	-11.17	-11.43	1.54e-06	0.01393	-1.28	1	1.87	-4.85178	7.44514	-1.71372	-0.00229252	2.35632	3.23367	-6.19129	-7.20108	-8.32097	2.02232	3.23367	-3.29147	5.16147
Tebufenozide	TBF	-5.15931	-3.19763	-3.54688	0.752874	-104.579	112.436	77.7549	84.6091	-33.7478	-20.3803	9.25248	11.491	287.5	117.6	405.1	DTXSID4034948	CCC1=CC=C(C=C1)C(=O)NN(C(=O)C1=CC(C)=CC(C)=C1)C(C)(C)C	14.14	-9.34	6.01	6.56	-14.14	-8.39	2.24e-08	2.34e-06	4.25	0	2.25	-6.35895	4.06956	0.353122	-3.85104e-07	2.35632	0.420057	-5.24815	-0.978197	-5.21699	-3.61441	0.420057	-2.92754	5.17754

## Sheet: models stats
System 1								System 2								Composite model
Water								H+
R2	0.421							R2	0.709							R2	0.82
	coef	std err	t	P>|t|	[0.025	0.975]			coef	std err	t	P>|t|	[0.025	0.975]			coef	std err	t	P>|t|	[0.025	0.975]
const	1.773	0.417	4.247	0	0.922	2.624		const	2.9527	0.241	12.251	0	2.461	3.444		const	2.5141	0.262	9.607	0	1.979	3.049
LJ p1	0.0556	0.06	0.923	0.363	-0.067	0.179		LJ p1	0.8473	0.337	2.517	0.017	0.161	1.534		LJ p1	0.6341	0.288	2.204	0.036	0.046	1.222
LJ p2	0.2679	0.089	3.014	0.005	0.087	0.449		LJ p2	-5.0251	1.567	-3.206	0.003	-8.222	-1.829		LJ p2	-5.8029	1.317	-4.406	0	-8.497	-3.109
LJ p3	-0.3229	0.129	-2.509	0.018	-0.585	-0.06		LJ p3	3.9294	1.444	2.721	0.011	0.984	6.875		LJ p3	4.9202	1.222	4.027	0	2.421	7.419
LJ std	0.645	0.294	2.197	0.036	0.046	1.244		LJ std	3.5786	0.925	3.867	0.001	1.691	5.466		LJ std	3.4931	0.773	4.52	0	1.912	5.074
Coul p1	-0.0274	0.019	-1.419	0.166	-0.067	0.012		Coul p1	-0.0072	0.002	-4.45	0	-0.01	-0.004		Coul p1	-0.0058	0.001	-4.072	0	-0.009	-0.003
Coul p2	-0.015	0.021	-0.727	0.473	-0.057	0.027		Coul p2	0.037	0.011	3.389	0.002	0.015	0.059		Coul p2	0.0314	0.009	3.336	0.002	0.012	0.051
Coul p3	0.044	0.031	1.418	0.166	-0.019	0.107		Coul p3	-0.0292	0.011	-2.701	0.011	-0.051	-0.007		Coul p3	-0.0257	0.009	-2.779	0.009	-0.045	-0.007
Coul std	-0.1201	0.071	-1.696	0.1	-0.264	0.024		Coul std	-0.0414	0.007	-6.342	0	-0.055	-0.028		Coul std	-0.0373	0.006	-6.235	0	-0.05	-0.025
VP	-6.1729	10.639	-0.58	0.566	-27.872	15.526		VP	-14.7515	7.753	-1.903	0.066	-30.564	1.061		W LJ p2	0.21	0.052	4.025	0	0.103	0.317
																W LJ p3	-0.2001	0.052	-3.843	0.001	-0.307	-0.094
Methanol																W LJ std	0.3548	0.08	4.45	0	0.192	0.518
R2	0.373															Sw	0.1362	0.063	2.163	0.039	0.007	0.265
	coef	std err	t	P>|t|	[0.025	0.975]
const	1.5818	0.543	2.912	0.007	0.474	2.69
LJ p1	-0.122	0.126	-0.971	0.339	-0.378	0.134										R2	0.74
LJ p2	0.0676	0.11	0.614	0.544	-0.157	0.292											coef	std err	t	P>|t|	[0.025	0.975]
LJ p3	0.0461	0.117	0.394	0.696	-0.193	0.285										const	2.514	0.278	9.049	0	1.95	3.078
LJ std	-0.1083	0.204	-0.532	0.598	-0.523	0.307										LJ p1	0.527	0.328	1.607	0.117	-0.139	1.193
Coul p1	-0.0743	0.06	-1.231	0.228	-0.197	0.049										LJ p2	-6.0376	1.509	-4.001	0	-9.101	-2.974
Coul p2	0.1405	0.059	2.382	0.024	0.02	0.261										LJ p3	5.2397	1.407	3.725	0.001	2.384	8.096
Coul p3	-0.0542	0.061	-0.883	0.384	-0.179	0.071										LJ std	3.4743	0.883	3.934	0	1.681	5.267
Coul std	-0.0225	0.091	-0.246	0.808	-0.209	0.164										Coul p1	-0.0054	0.002	-3.421	0.002	-0.009	-0.002
VP	-30.3756	12.057	-2.519	0.017	-54.967	-5.785										Coul p2	0.0221	0.01	2.195	0.035	0.002	0.043
																Coul p3	-0.0164	0.01	-1.705	0.097	-0.036	0.003
H3O+																Coul std	-0.0344	0.007	-4.995	0	-0.048	-0.02
R2	0.392															W LJ p2	0.1795	0.054	3.318	0.002	0.07	0.289
	coef	std err	t	P>|t|	[0.025	0.975]										W LJ p3	-0.1725	0.055	-3.145	0.003	-0.284	-0.061
const	2.8812	0.332	8.68	0	2.204	3.558										W LJ std	0.3099	0.082	3.761	0.001	0.143	0.477
LJ p1	-0.3871	0.212	-1.827	0.077	-0.819	0.045										Sw	0.1137	0.071	1.6	0.119	-0.031	0.258
LJ p2	0.0753	0.125	0.604	0.55	-0.179	0.33
LJ p3	0.3575	0.151	2.36	0.025	0.049	0.666
LJ std	-1.0485	0.538	-1.95	0.06	-2.145	0.048
Coul p1	0.0189	0.011	1.7	0.099	-0.004	0.042
Coul p2	-0.0032	0.008	-0.406	0.687	-0.019	0.013
Coul p3	-0.0107	0.013	-0.823	0.417	-0.037	0.016
Coul std	0.0334	0.036	0.929	0.36	-0.04	0.107
VP	-18.8478	16.282	-1.158	0.256	-52.055	14.359

## Sheet: ENTACT 504
Aliquot_Plate_Barcode	Aliquot_Well_ID	Aliquot_Concentration	Aliquot_Concentration_Unit	Target_Concentration	Target_Concentration_Unit	Aliquot_Solvent	DTXSID	CASRN	Preferred_Name
BF00173504	EPA_MIXTURE_006	20	mM	20	mM	DMSO	DTXSID4025612	4553-62-2	2-Methylpentanedinitrile
BF00173504	EPA_MIXTURE_006	20	mM	20	mM	DMSO	DTXSID8024317	5902-51-2	Terbacil
BF00173504	EPA_MIXTURE_006	20	mM	20	mM	DMSO	DTXSID6021959	118-79-6	2,4,6-Tribromophenol
BF00173504	EPA_MIXTURE_006	20	mM	20	mM	DMSO	DTXSID9023914	141-66-2	Dicrotophos
BF00173504	EPA_MIXTURE_006	20	mM	20	mM	DMSO	DTXSID3034612	69806-50-4	Fluazifop-butyl
BF00173504	EPA_MIXTURE_006	20	mM	20	mM	DMSO	DTXSID4034653	79983-71-4	Hexaconazole
BF00173504	EPA_MIXTURE_006	20	mM	20	mM	DMSO	DTXSID0020446	330-54-1	Diuron
BF00173504	EPA_MIXTURE_006	20	mM	20	mM	DMSO	DTXSID1025300	1241-94-7	2-Ethylhexyl diphenyl phosphate
BF00173504	EPA_MIXTURE_006	16	mM	20	mM	DMSO	DTXSID1032690	173584-44-6	Indoxacarb
BF00173504	EPA_MIXTURE_006	20	mM	20	mM	DMSO	DTXSID5022439	81-90-3	Phenolphthalin
BF00173504	EPA_MIXTURE_006	20	mM	20	mM	DMSO	DTXSID5027774	15708-41-5	Ethylenediaminetetraacetic acid ferric sodium salt
BF00173504	EPA_MIXTURE_006	20	mM	20	mM	DMSO	DTXSID0032605	51338-27-3	Diclofop-methyl
BF00173504	EPA_MIXTURE_006	20	mM	20	mM	DMSO	DTXSID5041512	140-38-5	4-Chlorophenylurea
BF00173504	EPA_MIXTURE_006	20	mM	20	mM	DMSO	DTXSID8020961	100-01-6	4-Nitroaniline
BF00173504	EPA_MIXTURE_006	20	mM	20	mM	DMSO	DTXSID9022817	1260-17-9	Carminic acid
BF00173504	EPA_MIXTURE_006	20	mM	20	mM	DMSO	DTXSID2034625	361377-29-9	Fluoxastrobin
BF00173504	EPA_MIXTURE_006	20	mM	20	mM	DMSO	DTXSID0047377	NOCAS_47377	AVE6324
BF00173504	EPA_MIXTURE_006	20	mM	20	mM	DMSO	DTXSID0020232	58-08-2	Caffeine
BF00173504	EPA_MIXTURE_006	20	mM	20	mM	DMSO	DTXSID5034303	81406-37-3	Fluroxypyr-meptyl
BF00173504	EPA_MIXTURE_006	20	mM	20	mM	DMSO	DTXSID2025680	4376-20-9	MEHP
BF00173504	EPA_MIXTURE_006	20	mM	20	mM	DMSO	DTXSID8024280	60207-90-1	Propiconazole
BF00173504	EPA_MIXTURE_006	20	mM	20	mM	DMSO	DTXSID8024157	33820-53-0	Isopropalin
BF00173504	EPA_MIXTURE_006	20	mM	20	mM	DMSO	DTXSID2020420	23950-58-5	Propyzamide
BF00173504	EPA_MIXTURE_006	20	mM	20	mM	DMSO	DTXSID2020890	56-04-2	6-Methyl-2-thiouracil
BF00173504	EPA_MIXTURE_006	20	mM	20	mM	DMSO	DTXSID0032520	131860-33-8	Azoxystrobin
BF00173504	EPA_MIXTURE_006	20	mM	20	mM	DMSO	DTXSID4020119	446-86-6	Azathioprine
BF00173504	EPA_MIXTURE_006	10	mM	20	mM	DMSO	DTXSID1047289	215297-27-1	UK-343664
BF00173504	EPA_MIXTURE_006	10	mM	20	mM	DMSO	DTXSID9047259	149062-75-9	PharmaGSID_47259
BF00173504	EPA_MIXTURE_006	20	mM	20	mM	DMSO	DTXSID3024152	81335-37-7	Imazaquin
BF00173504	EPA_MIXTURE_006	20	mM	20	mM	DMSO	DTXSID0021834	100-02-7	4-Nitrophenol
BF00173504	EPA_MIXTURE_006	20	mM	20	mM	DMSO	DTXSID9044538	13301-61-6	C.I. Disperse Orange 37
BF00173504	EPA_MIXTURE_006	20	mM	20	mM	DMSO	DTXSID7040360	163520-33-0	Isoxadifen-ethyl
BF00173504	EPA_MIXTURE_006	20	mM	20	mM	DMSO	DTXSID6022474	50-22-6	Corticosterone
BF00173504	EPA_MIXTURE_006	20	mM	20	mM	DMSO	DTXSID5020944	59-87-0	Nitrofurazone
BF00173504	EPA_MIXTURE_006	20	mM	20	mM	DMSO	DTXSID7047433	474-86-2	Equilin
BF00173504	EPA_MIXTURE_006	20	mM	20	mM	DMSO	DTXSID3034531	23564-06-9	Thiophanate
BF00173504	EPA_MIXTURE_006	20	mM	20	mM	DMSO	DTXSID6032354	105512-06-9	Clodinafop-propargyl
BF00173504	EPA_MIXTURE_006	19	mM	20	mM	DMSO	DTXSID7034549	165252-70-0	Dinotefuran
BF00173504	EPA_MIXTURE_006	20	mM	20	mM	DMSO	DTXSID1020069	97-56-3	2-Amino-5-azotoluene
BF00173504	EPA_MIXTURE_006	20	mM	20	mM	DMSO	DTXSID2025892	90-30-2	N-Phenyl-1-naphthylamine
BF00173504	EPA_MIXTURE_006	20	mM	20	mM	DMSO	DTXSID9037749	4638-48-6	5-Chlorosalicylanilide
BF00173504	EPA_MIXTURE_006	20	mM	20	mM	DMSO	DTXSID9021217	58-14-0	Pyrimethamine
BF00173504	EPA_MIXTURE_006	20	mM	20	mM	DMSO	DTXSID0021337	148-79-8	Thiabendazole
BF00173504	EPA_MIXTURE_006	20	mM	20	mM	DMSO	DTXSID8022406	131-56-6	2,4-Dihydroxybenzophenone
BF00173504	EPA_MIXTURE_006	20	mM	20	mM	DMSO	DTXSID8042187	109-46-6	N,N'-Dibutylthiourea
BF00173504	EPA_MIXTURE_006	20	mM	20	mM	DMSO	DTXSID0047456	826-62-0	2-Norbornene-5,6-dicarboxylic anhydride
BF00173504	EPA_MIXTURE_006	20	mM	20	mM	DMSO	DTXSID0032316	88-04-0	4-Chloro-3,5-dimethylphenol
BF00173504	EPA_MIXTURE_006	20	mM	20	mM	DMSO	DTXSID2034962	153719-23-4	Thiamethoxam
BF00173504	EPA_MIXTURE_006	20	mM	20	mM	DMSO	DTXSID6034392	188425-85-6	Boscalid
BF00173504	EPA_MIXTURE_006	20	mM	20	mM	DMSO	DTXSID6023862	1646-88-4	Aldoxycarb
BF00173504	EPA_MIXTURE_006	20	mM	20	mM	DMSO	DTXSID0024000	1861-32-1	Chlorthal-dimethyl
BF00173504	EPA_MIXTURE_006	20	mM	20	mM	DMSO	DTXSID5037494	6190-65-4	Deethylatrazine
BF00173504	EPA_MIXTURE_006	20	mM	20	mM	DMSO	DTXSID9020295	106-47-8	4-Chloroaniline
BF00173504	EPA_MIXTURE_006	20	mM	20	mM	DMSO	DTXSID9020160	82657-04-3	Bifenthrin
BF00173504	EPA_MIXTURE_006	20	mM	20	mM	DMSO	DTXSID3047425	1638-22-8	4-Butylphenol
BF00173504	EPA_MIXTURE_006	20	mM	20	mM	DMSO	DTXSID0044571	618-45-1	3-Isopropylphenol
BF00173504	EPA_MIXTURE_006	20	mM	20	mM	DMSO	DTXSID7032470	31218-83-4	Propetamphos
BF00173504	EPA_MIXTURE_006	20	mM	20	mM	DMSO	DTXSID8022111	709-98-8	Propanil
BF00173504	EPA_MIXTURE_006	20	mM	20	mM	DMSO	DTXSID7022679	58-85-5	Biotin
BF00173504	EPA_MIXTURE_006	20	mM	20	mM	DMSO	DTXSID0023296	61-73-4	Methylene blue
BF00173504	EPA_MIXTURE_006	20	mM	20	mM	DMSO	DTXSID7027540	3622-84-2	N-Butylbenzenesulfonamide
BF00173504	EPA_MIXTURE_006	20	mM	20	mM	DMSO	DTXSID1032482	96182-53-5	Tebupirimfos
BF00173504	EPA_MIXTURE_006	20	mM	20	mM	DMSO	DTXSID4041442	532-02-5	Sodium 2-naphthalenesulfonate
BF00173504	EPA_MIXTURE_006	20	mM	20	mM	DMSO	DTXSID9020299	510-15-6	Chlorobenzilate
BF00173504	EPA_MIXTURE_006	20	mM	20	mM	DMSO	DTXSID0042086	59227-89-3	Laurocapram
BF00173504	EPA_MIXTURE_006	20	mM	20	mM	DMSO	DTXSID3047265	NOCAS_47265	CP-471358
BF00173504	EPA_MIXTURE_006	20	mM	20	mM	DMSO	DTXSID0023901	25057-89-0	Bentazone
BF00173504	EPA_MIXTURE_006	20	mM	20	mM	DMSO	DTXSID6047280	289716-94-5	CP-607366
BF00173504	EPA_MIXTURE_006	20	mM	20	mM	DMSO	DTXSID5032525	149877-41-8	Bifenazate
BF00173504	EPA_MIXTURE_006	20	mM	20	mM	DMSO	DTXSID8024159	82558-50-7	Isoxaben
BF00173504	EPA_MIXTURE_006	20	mM	20	mM	DMSO	DTXSID8022828	4291-63-8	Cladribine
BF00173504	EPA_MIXTURE_006	20	mM	20	mM	DMSO	DTXSID3020966	62-23-7	4-Nitrobenzoic acid
BF00173504	EPA_MIXTURE_006	20	mM	20	mM	DMSO	DTXSID4022020	314-40-9	Bromacil
BF00173504	EPA_MIXTURE_006	20	mM	20	mM	DMSO	DTXSID7042198	1907-65-9	N-Butyl-p-toluenesulfonamide
BF00173504	EPA_MIXTURE_006	20	mM	20	mM	DMSO	DTXSID6024460	60-09-3	4-Aminoazobenzene
BF00173504	EPA_MIXTURE_006	20	mM	20	mM	DMSO	DTXSID6025068	84-75-3	Dihexyl phthalate
BF00173504	EPA_MIXTURE_006	20	mM	20	mM	DMSO	DTXSID8034956	112281-77-3	Tetraconazole
BF00173504	EPA_MIXTURE_006	20	mM	20	mM	DMSO	DTXSID5020576	57-63-6	17alpha-Ethinylestradiol
BF00173504	EPA_MIXTURE_006	20	mM	20	mM	DMSO	DTXSID4022731	298-46-4	Carbamazepine
BF00173504	EPA_MIXTURE_006	20	mM	20	mM	DMSO	DTXSID9024986	80-07-9	4,4'-Dichlorodiphenyl sulfone
BF00173504	EPA_MIXTURE_006	20	mM	20	mM	DMSO	DTXSID4020959	99-55-8	2-Methyl-5-nitroaniline
BF00173504	EPA_MIXTURE_006	20	mM	20	mM	DMSO	DTXSID4044901	2694-54-4	Triallyl trimellitate
BF00173504	EPA_MIXTURE_006	20	mM	20	mM	DMSO	DTXSID5020869	101-61-1	4,4'-Methylenebis(N,N-dimethylaniline)
BF00173504	EPA_MIXTURE_006	18	mM	20	mM	DMSO	DTXSID0047327	313994-79-5	MK-578
BF00173504	EPA_MIXTURE_006	20	mM	20	mM	DMSO	DTXSID9047590	94-47-3	2-Phenylethyl benzoate
BF00173504	EPA_MIXTURE_006	20	mM	20	mM	DMSO	DTXSID8032544	136-45-8	Dipropyl 2,5-pyridinedicarboxylate
BF00173504	EPA_MIXTURE_006	20	mM	20	mM	DMSO	DTXSID8047391	1068967-96-3	SAR102608
BF00173504	EPA_MIXTURE_006	20	mM	20	mM	DMSO	DTXSID7030307	626-43-7	3,5-Dichloroaniline
BF00173504	EPA_MIXTURE_006	20	mM	20	mM	DMSO	DTXSID1048178	136042-19-8	FR130739
BF00173504	EPA_MIXTURE_006	13	mM	20	mM	DMSO	DTXSID6047313	263553-33-9	GW473178E methyl benzene sulphonic acid
BF00173504	EPA_MIXTURE_006	20	mM	20	mM	DMSO	DTXSID5047291	NOCAS_47291	CI-1044
BF00173504	EPA_MIXTURE_006	20	mM	20	mM	DMSO	DTXSID0047248	NOCAS_47248	CI-1018
BF00173504	EPA_MIXTURE_006	20	mM	20	mM	DMSO	DTXSID4047254	220860-50-4	CP-457920
BF00173504	EPA_MIXTURE_006	20	mM	20	mM	DMSO	DTXSID5041275	142-18-7	1-Monolaurin
BF00173504	EPA_MIXTURE_006	20	mM	20	mM	DMSO	DTXSID6042369	81-88-9	Rhodamine B
BF00173504	EPA_MIXTURE_006	20	mM	20	mM	DMSO	DTXSID7047356	473289-62-2	Ilepatril
BF00173504	EPA_MIXTURE_006	20	mM	20	mM	DMSO	DTXSID4034948	112410-23-8	Tebufenozide
BF00173504	EPA_MIXTURE_006	20	mM	20	mM	DMSO	DTXSID0034223	119168-77-3	Tebufenpyrad
BF00173504	EPA_MIXTURE_006	20	mM	20	mM	DMSO	DTXSID5023742	81-81-2	Warfarin
BF00173504	EPA_MIXTURE_006	20	mM	20	mM	DMSO	DTXSID2041389	93-08-3	2'-Acetonaphthone
BF00173504	EPA_MIXTURE_006	20	mM	20	mM	DMSO	DTXSID5020863	41372-08-1	Methyldopa sesquihydrate
BF00173504	EPA_MIXTURE_006	20	mM	20	mM	DMSO	DTXSID8044381	13676-54-5	Bismaleimide
BF00173504	EPA_MIXTURE_006	20	mM	20	mM	DMSO	DTXSID9024568	98-11-3	Benzenesulfonic acid
BF00173504	EPA_MIXTURE_006	20	mM	20	mM	DMSO	DTXSID5044998	88485-37-4	Fluxofenim
BF00173504	EPA_MIXTURE_006	20	mM	20	mM	DMSO	DTXSID8027086	141-23-1	Methyl 12-hydroxyoctadecanoate
BF00173504	EPA_MIXTURE_006	20	mM	20	mM	DMSO	DTXSID4026975	121-03-9	2-Methyl-5-nitrobenzenesulfonic acid
BF00173504	EPA_MIXTURE_006	20	mM	20	mM	DMSO	DTXSID2035481	3572-06-3	4-(4-(Acetyloxy)phenyl)-2-butanone
BF00173504	EPA_MIXTURE_006	20	mM	20	mM	DMSO	DTXSID5026209	933-75-5	2,3,6-Trichlorophenol
BF00173504	EPA_MIXTURE_006	10	mM	20	mM	DMSO	DTXSID5047249	221246-12-4	Fandosentan potassium salt
BF00173504	EPA_MIXTURE_006	20	mM	20	mM	DMSO	DTXSID0044490	59337-93-8	Methyl 3-sulfamoylthiophene-2-carboxylate
BF00173504	EPA_MIXTURE_006	20	mM	20	mM	DMSO	DTXSID0037237	10238-21-8	Glybenclamide
BF00173504	EPA_MIXTURE_006	20	mM	20	mM	DMSO	DTXSID4020539	86-29-3	Diphenylacetonitrile
BF00173504	EPA_MIXTURE_006	20	mM	20	mM	DMSO	DTXSID7021867	106-40-1	4-Bromoaniline
BF00173504	EPA_MIXTURE_006	20	mM	20	mM	DMSO	DTXSID8044620	2459-10-1	Trimethyl benzene-1,2,4-tricarboxylate
BF00173504	EPA_MIXTURE_006	20	mM	20	mM	DMSO	DTXSID8024573	51-17-2	Benzimidazole
BF00173504	EPA_MIXTURE_006	20	mM	20	mM	DMSO	DTXSID5021962	120-07-0	N-Phenyldiethanolamine
BF00173504	EPA_MIXTURE_006	20	mM	20	mM	DMSO	DTXSID9024485	1747-60-0	2-Amino-6-methoxybenzothiazole
BF00173504	EPA_MIXTURE_006	20	mM	20	mM	DMSO	DTXSID7029166	135-76-2	Sodium 6-hydroxynaphthalene-2-sulfonate
BF00173504	EPA_MIXTURE_006	20	mM	20	mM	DMSO	DTXSID3027085	141-17-3	Bis[2-(2-butoxyethoxy)ethyl] hexandioate
BF00173504	EPA_MIXTURE_006	20	mM	20	mM	DMSO	DTXSID7040152	497-76-7	Arbutin
BF00173504	EPA_MIXTURE_006	20	mM	20	mM	DMSO	DTXSID4044664	3778-76-5	Todralazine hydrochloride
BF00173504	EPA_MIXTURE_006	20	mM	20	mM	DMSO	DTXSID9040760	317318-84-6	{4-[({2-[3-Fluoro-4-(trifluoromethyl)phenyl]-4-methyl-1,3-thiazol-5-yl}methyl)sulfanyl]-2-methylphenoxy}acetic acid
BF00173504	EPA_MIXTURE_006	20	mM	20	mM	DMSO	DTXSID9044534	13031-43-1	4-Acetylphenyl acetate
BF00173504	EPA_MIXTURE_006	20	mM	20	mM	DMSO	DTXSID3047508	607-88-5	Salicylic acid p-tolyl ester
BF00173504	EPA_MIXTURE_006	20	mM	20	mM	DMSO	DTXSID5031133	131-16-8	Dipropyl phthalate
BF00173504	EPA_MIXTURE_006	20	mM	20	mM	DMSO	DTXSID3040720	5930-28-9	4-Amino-2,6-dichlorophenol
BF00173504	EPA_MIXTURE_006	20	mM	20	mM	DMSO	DTXSID2023224	79794-75-5	Loratadine
BF00173504	EPA_MIXTURE_006	20	mM	20	mM	DMSO	DTXSID7020427	609-20-1	2,6-Dichloro-1,4-benzenediamine
BF00173504	EPA_MIXTURE_006	20	mM	20	mM	DMSO	DTXSID3025540	54-64-8	Thimerosal
BF00173504	EPA_MIXTURE_006	16	mM	20	mM	DMSO	DTXSID4038922	4162-45-2	Tetrabromobisphenol A bis(2-hydroxyethyl) ether
BF00173504	EPA_MIXTURE_006	20	mM	20	mM	DMSO	DTXSID1031626	1896-62-4	Methyl trans-styryl ketone
BF00173504	EPA_MIXTURE_006	20	mM	20	mM	DMSO	DTXSID5044940	42594-17-2	Octahydro-1H-4,7-methanoindene-1,5-diyldimethanediyl bisprop-2-enoate
BF00173504	EPA_MIXTURE_006	20	mM	20	mM	DMSO	DTXSID6021290	57-68-1	Sulfamethazine
BF00173504	EPA_MIXTURE_006	20	mM	20	mM	DMSO	DTXSID9023201	75706-12-6	Leflunomide
BF00173504	EPA_MIXTURE_006	20	mM	20	mM	DMSO	DTXSID0027806	19525-59-8	Potassium anilinoacetate
BF00173504	EPA_MIXTURE_006	20	mM	20	mM	DMSO	DTXSID8044882	2358-84-1	Di(ethylene glycol) dimethacrylate
BF00173504	EPA_MIXTURE_006	20	mM	20	mM	DMSO	DTXSID6037728	1143-72-2	2,3,4-Trihydroxbenzophenone
BF00173504	EPA_MIXTURE_006	20	mM	20	mM	DMSO	DTXSID5044869	2057-49-0	4-(3-Phenylpropyl)pyridine
BF00173504	EPA_MIXTURE_006	20	mM	20	mM	DMSO	DTXSID4047094	94-02-0	Ethyl benzoylacetate
BF00173504	EPA_MIXTURE_006	20	mM	20	mM	DMSO	DTXSID8027797	18268-70-7	Tetraethylene glycol di(2-ethylhexanoate)
BF00173504	EPA_MIXTURE_006	20	mM	20	mM	DMSO	DTXSID3021487	528-44-9	1,2,4-Benzenetricarboxylic acid
BF00173504	EPA_MIXTURE_006	20	mM	20	mM	DMSO	DTXSID4041995	3878-19-1	Fuberidazole
BF00173504	EPA_MIXTURE_006	20	mM	20	mM	DMSO	DTXSID6047446	34161-23-4	Fipexide hydrochloride
BF00173504	EPA_MIXTURE_006	20	mM	20	mM	DMSO	DTXSID1020697	148081-72-5	1-O-Hexyl-2,3,5-trimethylhydroquinone
BF00173504	EPA_MIXTURE_006	20	mM	20	mM	DMSO	DTXSID9021342	97-18-7	Bithionol
BF00173504	EPA_MIXTURE_006	20	mM	20	mM	DMSO	DTXSID3022798	80-77-3	Chlormezanone
BF00173504	EPA_MIXTURE_006	20	mM	20	mM	DMSO	DTXSID4041600	36001-88-4	Amiprofos-methyl
BF00173504	EPA_MIXTURE_006	20	mM	20	mM	DMSO	DTXSID5047530	1244-76-4	Hydroxyzine hydrochloride
BF00173504	EPA_MIXTURE_006	20	mM	20	mM	DMSO	DTXSID2042220	63284-71-9	Nuarimol
BF00173504	EPA_MIXTURE_006	20	mM	20	mM	DMSO	DTXSID6020779	434-13-9	Lithocholic acid
BF00173504	EPA_MIXTURE_006	20	mM	20	mM	DMSO	DTXSID6040290	13360-45-7	Chlorbromuron
BF00173504	EPA_MIXTURE_006	20	mM	20	mM	DMSO	DTXSID6020690	70-30-4	Hexachlorophene
BF00173504	EPA_MIXTURE_006	20	mM	20	mM	DMSO	DTXSID1044982	70693-59-3	2-Amino-N-cyclohexyl-N-methylbenzenesulfonamide
BF00173504	EPA_MIXTURE_006	20	mM	20	mM	DMSO	DTXSID3020960	602-87-9	5-Nitroacenaphthene
BF00173504	EPA_MIXTURE_006	20	mM	20	mM	DMSO	DTXSID7021314	15721-02-5	2,2',5,5'-Tetrachlorobenzidine
BF00173504	EPA_MIXTURE_006	20	mM	20	mM	DMSO	DTXSID0020020	18699-02-0	4-Acetylaminophenylacetic acid
BF00173504	EPA_MIXTURE_006	20	mM	20	mM	DMSO	DTXSID3022164	1745-81-9	2-Allylphenol
BF00173504	EPA_MIXTURE_006	20	mM	20	mM	DMSO	DTXSID5020732	15687-27-1	Ibuprofen
BF00173504	EPA_MIXTURE_006	20	mM	20	mM	DMSO	DTXSID5024687	98-29-3	4-tert-Butylcatechol
BF00173504	EPA_MIXTURE_006	20	mM	20	mM	DMSO	DTXSID7026526	88-44-8	2-Amino-5-methylbenzenesulfonic acid
BF00173504	EPA_MIXTURE_006	20	mM	20	mM	DMSO	DTXSID0044868	2050-43-3	N-(2,4-Dimethylphenyl)acetamide
BF00173504	EPA_MIXTURE_006	20	mM	20	mM	DMSO	DTXSID1047493	3092-17-9	Midodrine hydrochloride
BF00173504	EPA_MIXTURE_006	11	mM	20	mM	DMSO	DTXSID4037582	17040-19-6	Demeton-S-methylsulphon
BF00173504	EPA_MIXTURE_006	8	mM	20	mM	DMSO	DTXSID1047316	461023-63-2	Aplaviroc hydrochloride
BF00173504	EPA_MIXTURE_006	20	mM	20	mM	DMSO	DTXSID8044410	21799-87-1	Potassium 2,5-dihydroxybenzenesulfonate
BF00173504	EPA_MIXTURE_006	20	mM	20	mM	DMSO	DTXSID0042117	2595-54-2	Mecarbam
BF00173504	EPA_MIXTURE_006	20	mM	20	mM	DMSO	DTXSID4047206	60125-24-8	trans-2-Methoxycinnamaldehyde
BF00173504	EPA_MIXTURE_006	20	mM	20	mM	DMSO	DTXSID4047543	57646-30-7	Furalaxyl
BF00173504	EPA_MIXTURE_006	20	mM	20	mM	DMSO	DTXSID6044561	31677-93-7	Bupropion hydrochloride
BF00173504	EPA_MIXTURE_006	20	mM	20	mM	DMSO	DTXSID9026261	13674-87-8	Tris(1,3-dichloro-2-propyl) phosphate
BF00173504	EPA_MIXTURE_006	20	mM	20	mM	DMSO	DTXSID2044397	1493-13-6	Trifluoromethanesulfonic acid
BF00173504	EPA_MIXTURE_006	20	mM	20	mM	DMSO	DTXSID3044625	25209-66-9	N,N-Bis(2-hydroxyethyl)formamide
BF00173504	EPA_MIXTURE_006	14	mM	20	mM	DMSO	DTXSID7021780	84-66-2	Diethyl phthalate
BF00173504	EPA_MIXTURE_006	20	mM	20	mM	DMSO	DTXSID9020247	63-25-2	Carbaryl
BF00173504	EPA_MIXTURE_006	3	mM	20	mM	DMSO	DTXSID5047243	911217-00-0	Ammonium glycyrrhizinate trihydrate
BF00173504	EPA_MIXTURE_006	17	mM	20	mM	DMSO	DTXSID1034844	32889-48-8	Procyazine
BF00173504	EPA_MIXTURE_006	16	mM	20	mM	DMSO	DTXSID8047349	NOCAS_47349	AVE8488
BF00173504	EPA_MIXTURE_006	17	mM	20	mM	DMSO	DTXSID2020971	607-57-8	2-Nitrofluorene
BF00173504	EPA_MIXTURE_006	20	mM	20	mM	DMSO	DTXSID4022527	94-13-3	Propylparaben
BF00173504	EPA_MIXTURE_006	13	mM	20	mM	DMSO	DTXSID6042365	16489-90-0	6-Ethoxy-2,3,4-trimethyl-1,2,3,4-tetrahydroquinoline
BF00173504	EPA_MIXTURE_006	11	mM	20	mM	DMSO	DTXSID3021198	318-98-9	Propranolol hydrochloride
BF00173504	EPA_MIXTURE_006	13	mM	20	mM	DMSO	DTXSID9044877	22987-10-6	N-(3-Aminophenyl)propanamide
BF00173504	EPA_MIXTURE_006	20	mM	20	mM	DMSO	DTXSID5047039	39711-79-0	N-Ethyl-4-menthane-3-carboxamide
BF00173504	EPA_MIXTURE_006	20	mM	20	mM	DMSO	DTXSID1040740	26172-54-3	2-Methyl-4-isothiazolin-3-one hydrochloride
BF00173504	EPA_MIXTURE_006	4	mM	20	mM	DMSO	DTXSID5025021	84-61-7	Dicyclohexyl phthalate

## Sheet: ENTACT 506
Aliquot_Plate_Barcode	Aliquot_Well_ID	Aliquot_Concentration	Aliquot_Concentration_Unit	Target_Concentration	Target_Concentration_Unit	Aliquot_Solvent	DTXSID	CASRN	Preferred_Name
BF00173506	EPA_MIXTURE_008	20	mM	20	mM	DMSO	DTXSID0034930	98886-44-3	Fosthiazate
BF00173506	EPA_MIXTURE_008	20	mM	20	mM	DMSO	DTXSID1038298	5315-79-7	1-Hydroxypyrene
BF00173506	EPA_MIXTURE_008	20	mM	20	mM	DMSO	DTXSID2026446	77-90-7	Acetyl tributyl citrate
BF00173506	EPA_MIXTURE_008	20	mM	20	mM	DMSO	DTXSID5041643	1008-72-6	Sodium 2-formylbenzenesulfonate
BF00173506	EPA_MIXTURE_008	20	mM	20	mM	DMSO	DTXSID0022777	169590-42-5	Celecoxib
BF00173506	EPA_MIXTURE_008	20	mM	20	mM	DMSO	DTXSID6034849	25606-41-1	Propamocarb hydrochloride
BF00173506	EPA_MIXTURE_008	20	mM	20	mM	DMSO	DTXSID0032578	59669-26-0	Thiodicarb
BF00173506	EPA_MIXTURE_008	20	mM	20	mM	DMSO	DTXSID1042154	493-52-7	Methyl red
BF00173506	EPA_MIXTURE_008	20	mM	20	mM	DMSO	DTXSID0032651	51707-55-2	Thidiazuron
BF00173506	EPA_MIXTURE_008	20	mM	20	mM	DMSO	DTXSID3021770	79-95-8	2,2',6,6'-Tetrachlorobisphenol A
BF00173506	EPA_MIXTURE_008	20	mM	20	mM	DMSO	DTXSID2032398	131341-86-1	Fludioxonil
BF00173506	EPA_MIXTURE_008	20	mM	20	mM	DMSO	DTXSID4034528	145701-21-9	Diclosulam
BF00173506	EPA_MIXTURE_008	20	mM	20	mM	DMSO	DTXSID0020523	51-28-5	2,4-Dinitrophenol
BF00173506	EPA_MIXTURE_008	20	mM	20	mM	DMSO	DTXSID0034803	219714-96-2	Penoxsulam
BF00173506	EPA_MIXTURE_008	20	mM	20	mM	DMSO	DTXSID6024337	28249-77-6	Thiobencarb
BF00173506	EPA_MIXTURE_008	20	mM	20	mM	DMSO	DTXSID2022678	90357-06-5	Bicalutamide
BF00173506	EPA_MIXTURE_008	20	mM	20	mM	DMSO	DTXSID7020182	80-05-7	Bisphenol A
BF00173506	EPA_MIXTURE_008	20	mM	20	mM	DMSO	DTXSID2020713	58-93-5	Hydrochlorothiazide
BF00173506	EPA_MIXTURE_008	20	mM	20	mM	DMSO	DTXSID2022381	84-16-2	meso-Hexestrol
BF00173506	EPA_MIXTURE_008	20	mM	20	mM	DMSO	DTXSID4040713	1034-01-1	Octyl gallate
BF00173506	EPA_MIXTURE_008	20	mM	20	mM	DMSO	DTXSID3022536	599-64-4	4-Cumylphenol
BF00173506	EPA_MIXTURE_008	20	mM	20	mM	DMSO	DTXSID3022370	57-83-0	Progesterone
BF00173506	EPA_MIXTURE_008	20	mM	20	mM	DMSO	DTXSID6023652	154-42-7	6-Thioguanine
BF00173506	EPA_MIXTURE_008	20	mM	20	mM	DMSO	DTXSID3037541	1031-07-8	Endosulfan sulfate
BF00173506	EPA_MIXTURE_008	20	mM	20	mM	DMSO	DTXSID3020916	2243-62-1	1,5-Naphthalenediamine
BF00173506	EPA_MIXTURE_008	20	mM	20	mM	DMSO	DTXSID7024035	94-82-6	2,4-DB
BF00173506	EPA_MIXTURE_008	20	mM	20	mM	DMSO	DTXSID9020112	1912-24-9	Atrazine
BF00173506	EPA_MIXTURE_008	20	mM	20	mM	DMSO	DTXSID2026529	88-60-8	2-tert-Butyl-5-methylphenol
BF00173506	EPA_MIXTURE_008	16	mM	20	mM	DMSO	DTXSID3022162	1689-84-5	Bromoxynil
BF00173506	EPA_MIXTURE_008	20	mM	20	mM	DMSO	DTXSID4024145	51235-04-2	Hexazinone
BF00173506	EPA_MIXTURE_008	20	mM	20	mM	DMSO	DTXSID3038939	754-91-6	PFOSA
BF00173506	EPA_MIXTURE_008	20	mM	20	mM	DMSO	DTXSID6032641	84087-01-4	Quinclorac
BF00173506	EPA_MIXTURE_008	20	mM	20	mM	DMSO	DTXSID4022525	5153-25-3	2-Ethylhexylparaben
BF00173506	EPA_MIXTURE_008	20	mM	20	mM	DMSO	DTXSID4024195	94-74-6	MCPA
BF00173506	EPA_MIXTURE_008	20	mM	20	mM	DMSO	DTXSID1034503	122008-85-9	Cyhalofop-butyl
BF00173506	EPA_MIXTURE_008	20	mM	20	mM	DMSO	DTXSID2027200	553-26-4	4,4'-Bipyridine
BF00173506	EPA_MIXTURE_008	20	mM	20	mM	DMSO	DTXSID1020932	59-67-6	Nicotinic acid
BF00173506	EPA_MIXTURE_008	20	mM	20	mM	DMSO	DTXSID9036515	57-85-2	Testosterone propionate
BF00173506	EPA_MIXTURE_008	5	mM	20	mM	DMSO	DTXSID4047383	NOCAS_47383	AVE3247
BF00173506	EPA_MIXTURE_008	20	mM	20	mM	DMSO	DTXSID5034270	104098-48-8	Imazapic
BF00173506	EPA_MIXTURE_008	20	mM	20	mM	DMSO	DTXSID5047295	291305-06-1	UK-373911
BF00173506	EPA_MIXTURE_008	20	mM	20	mM	DMSO	DTXSID9048516	NOCAS_48516	PharmaGSID_48516
BF00173506	EPA_MIXTURE_008	10	mM	20	mM	DMSO	DTXSID5047376	648917-13-9	AVE2865
BF00173506	EPA_MIXTURE_008	20	mM	20	mM	DMSO	DTXSID9043938	2528-16-7	Monobenzyl phthalate
BF00173506	EPA_MIXTURE_008	19	mM	20	mM	DMSO	DTXSID1026081	79-94-7	3,3',5,5'-Tetrabromobisphenol A
BF00173506	EPA_MIXTURE_008	20	mM	20	mM	DMSO	DTXSID0020311	150-68-5	Monuron
BF00173506	EPA_MIXTURE_008	20	mM	20	mM	DMSO	DTXSID0047294	668981-02-0	CP-863187
BF00173506	EPA_MIXTURE_008	20	mM	20	mM	DMSO	DTXSID7047279	261947-38-0	CP-532623
BF00173506	EPA_MIXTURE_008	20	mM	20	mM	DMSO	DTXSID1047285	527680-56-4	PHA-00568487
BF00173506	EPA_MIXTURE_008	20	mM	20	mM	DMSO	DTXSID4034609	120068-37-3	Fipronil
BF00173506	EPA_MIXTURE_008	20	mM	20	mM	DMSO	DTXSID0047375	862243-29-6	AVE9423
BF00173506	EPA_MIXTURE_008	20	mM	20	mM	DMSO	DTXSID5026706	104-66-5	1,2-Diphenoxyethane
BF00173506	EPA_MIXTURE_008	7	mM	20	mM	DMSO	DTXSID0048183	78473-71-9	Enterolactone
BF00173506	EPA_MIXTURE_008	20	mM	20	mM	DMSO	DTXSID3025091	119-90-4	3,3'-Dimethoxybenzidine
BF00173506	EPA_MIXTURE_008	20	mM	20	mM	DMSO	DTXSID4036435	2687-94-7	N-Octyl-2-pyrrolidone
BF00173506	EPA_MIXTURE_008	20	mM	20	mM	DMSO	DTXSID8029105	70-55-3	4-Toluenesulfonamide
BF00173506	EPA_MIXTURE_008	20	mM	20	mM	DMSO	DTXSID1026035	2492-26-4	Sodium 2-mercaptobenzothiolate
BF00173506	EPA_MIXTURE_008	20	mM	20	mM	DMSO	DTXSID9033923	32809-16-8	Procymidone
BF00173506	EPA_MIXTURE_008	20	mM	20	mM	DMSO	DTXSID7021605	124-04-9	Hexanedioic acid
BF00173506	EPA_MIXTURE_008	20	mM	20	mM	DMSO	DTXSID8032675	35400-43-2	Sulprofos
BF00173506	EPA_MIXTURE_008	20	mM	20	mM	DMSO	DTXSID9034997	81741-28-8	Tributyltetradecylphosphonium chloride
BF00173506	EPA_MIXTURE_008	20	mM	20	mM	DMSO	DTXSID6020068	117-79-3	2-Aminoanthraquinone
BF00173506	EPA_MIXTURE_008	20	mM	20	mM	DMSO	DTXSID9027522	3147-75-9	Octrizole
BF00173506	EPA_MIXTURE_008	18	mM	20	mM	DMSO	DTXSID8021301	54965-24-1	Tamoxifen citrate
BF00173506	EPA_MIXTURE_008	18	mM	20	mM	DMSO	DTXSID8023216	6893-02-3	3,5,3'-Triiodothyronine
BF00173506	EPA_MIXTURE_008	20	mM	20	mM	DMSO	DTXSID4034150	52-86-8	Haloperidol
BF00173506	EPA_MIXTURE_008	20	mM	20	mM	DMSO	DTXSID5031131	131-18-0	Dipentyl phthalate
BF00173506	EPA_MIXTURE_008	20	mM	20	mM	DMSO	DTXSID5020154	120-32-1	Clorophene
BF00173506	EPA_MIXTURE_008	20	mM	20	mM	DMSO	DTXSID3034402	23184-66-9	Butachlor
BF00173506	EPA_MIXTURE_008	20	mM	20	mM	DMSO	DTXSID8023719	97322-87-7	Troglitazone
BF00173506	EPA_MIXTURE_008	20	mM	20	mM	DMSO	DTXSID1021952	115-86-6	Triphenyl phosphate
BF00173506	EPA_MIXTURE_008	20	mM	20	mM	DMSO	DTXSID6021666	544-63-8	Tetradecanoic acid
BF00173506	EPA_MIXTURE_008	20	mM	20	mM	DMSO	DTXSID8022325	2971-36-0	2,2-Bis(4-hydroxyphenyl)-1,1,1-trichloroethane
BF00173506	EPA_MIXTURE_008	20	mM	20	mM	DMSO	DTXSID2041252	128-95-0	1,4-Diaminoanthraquinone
BF00173506	EPA_MIXTURE_008	20	mM	20	mM	DMSO	DTXSID6045400	7681-76-7	Ronidazole
BF00173506	EPA_MIXTURE_008	20	mM	20	mM	DMSO	DTXSID0026967	120-55-8	Diethylene glycol dibenzoate
BF00173506	EPA_MIXTURE_008	20	mM	20	mM	DMSO	DTXSID3024239	19666-30-9	Oxadiazon
BF00173506	EPA_MIXTURE_008	20	mM	20	mM	DMSO	DTXSID2024086	563-12-2	Ethion
BF00173506	EPA_MIXTURE_008	20	mM	20	mM	DMSO	DTXSID1024049	35367-38-5	Diflubenzuron
BF00173506	EPA_MIXTURE_008	10	mM	20	mM	DMSO	DTXSID6047525	81131-70-6	Pravastatin sodium
BF00173506	EPA_MIXTURE_008	20	mM	20	mM	DMSO	DTXSID5040708	33228-45-4	4-Hexylaniline
BF00173506	EPA_MIXTURE_008	20	mM	20	mM	DMSO	DTXSID6024175	57837-19-1	Metalaxyl
BF00173506	EPA_MIXTURE_008	20	mM	20	mM	DMSO	DTXSID7024112	72178-02-0	Fomesafen
BF00173506	EPA_MIXTURE_008	13	mM	20	mM	DMSO	DTXSID7041097	85532-75-8	PK 11195
BF00173506	EPA_MIXTURE_008	20	mM	20	mM	DMSO	DTXSID7041544	21145-77-7	6-Acetyl-1,1,2,4,4,7-hexamethyltetralin
BF00173506	EPA_MIXTURE_008	20	mM	20	mM	DMSO	DTXSID0020573	50-28-2	17beta-Estradiol
BF00173506	EPA_MIXTURE_008	20	mM	20	mM	DMSO	DTXSID0034227	119515-38-7	Icaridin
BF00173506	EPA_MIXTURE_008	14	mM	20	mM	DMSO	DTXSID2020501	1095-90-5	Methadone hydrochloride
BF00173506	EPA_MIXTURE_008	20	mM	20	mM	DMSO	DTXSID0020656	77-06-5	Gibberellic acid
BF00173506	EPA_MIXTURE_008	20	mM	20	mM	DMSO	DTXSID4034497	125116-23-6	Metconazole
BF00173506	EPA_MIXTURE_008	20	mM	20	mM	DMSO	DTXSID1032519	135158-54-2	Acibenzolar-S-methyl
BF00173506	EPA_MIXTURE_008	20	mM	20	mM	DMSO	DTXSID5032579	64700-56-7	Triclopyr-butotyl
BF00173506	EPA_MIXTURE_008	20	mM	20	mM	DMSO	DTXSID4044581	96-70-8	2-tert-Butyl-4-ethylphenol
BF00173506	EPA_MIXTURE_008	20	mM	20	mM	DMSO	DTXSID0023951	5234-68-4	Carboxin
BF00173506	EPA_MIXTURE_008	20	mM	20	mM	DMSO	DTXSID8023846	30560-19-1	Acephate
BF00173506	EPA_MIXTURE_008	20	mM	20	mM	DMSO	DTXSID9034864	181274-15-7	Propoxycarbazone-sodium
BF00173506	EPA_MIXTURE_008	20	mM	20	mM	DMSO	DTXSID3021726	65-45-2	Salicylamide
BF00173506	EPA_MIXTURE_008	20	mM	20	mM	DMSO	DTXSID0040707	33228-44-3	4-Pentylaniline
BF00173506	EPA_MIXTURE_008	20	mM	20	mM	DMSO	DTXSID2034465	210880-92-5	Clothianidin
BF00173506	EPA_MIXTURE_008	20	mM	20	mM	DMSO	DTXSID6020147	95-14-7	1,2,3-Benzotriazole
BF00173506	EPA_MIXTURE_008	20	mM	20	mM	DMSO	DTXSID4024270	67747-09-5	Prochloraz
BF00173506	EPA_MIXTURE_008	20	mM	20	mM	DMSO	DTXSID8024315	88671-89-0	Myclobutanil
BF00173506	EPA_MIXTURE_008	20	mM	20	mM	DMSO	DTXSID4048195	18979-55-0	4-(Hexyloxy)phenol
BF00173506	EPA_MIXTURE_008	20	mM	20	mM	DMSO	DTXSID4032376	87674-68-8	Dimethenamid
BF00173506	EPA_MIXTURE_008	20	mM	20	mM	DMSO	DTXSID8044593	15619-48-4	1-Benzylquinolinium chloride
BF00173506	EPA_MIXTURE_008	5	mM	20	mM	DMSO	DTXSID1047368	344930-95-6	SSR69071
BF00173506	EPA_MIXTURE_008	20	mM	20	mM	DMSO	DTXSID5038888	2390-60-5	Basic Blue 7
BF00173506	EPA_MIXTURE_008	20	mM	20	mM	DMSO	DTXSID4021185	53-03-2	Prednisone
BF00173506	EPA_MIXTURE_008	20	mM	20	mM	DMSO	DTXSID5021126	92-84-2	Phenothiazine
BF00173506	EPA_MIXTURE_008	17	mM	20	mM	DMSO	DTXSID4027527	3194-55-6	1,2,5,6,9,10-Hexabromocyclododecane
BF00173506	EPA_MIXTURE_008	20	mM	20	mM	DMSO	DTXSID8024107	59756-60-4	Fluridone
BF00173506	EPA_MIXTURE_008	21	mM	20	mM	DMSO	DTXSID0022480	620-17-7	3-Ethylphenol
BF00173506	EPA_MIXTURE_008	20	mM	20	mM	DMSO	DTXSID5022437	500-38-9	Nordihydroguaiaretic acid
BF00173506	EPA_MIXTURE_008	20	mM	20	mM	DMSO	DTXSID1020140	532-32-1	Sodium benzoate
BF00173506	EPA_MIXTURE_008	20	mM	20	mM	DMSO	DTXSID7032688	26002-80-2	Phenothrin
BF00173506	EPA_MIXTURE_008	20	mM	20	mM	DMSO	DTXSID0020652	25812-30-0	Gemfibrozil
BF00173506	EPA_MIXTURE_008	20	mM	20	mM	DMSO	DTXSID3023897	43121-43-3	Triadimefon
BF00173506	EPA_MIXTURE_008	20	mM	20	mM	DMSO	DTXSID1040794	6152-33-6	Sodium 2-phenylphenate tetrahydrate
BF00173506	EPA_MIXTURE_008	20	mM	20	mM	DMSO	DTXSID7025003	583-78-8	2,5-Dichlorophenol
BF00173506	EPA_MIXTURE_008	20	mM	20	mM	DMSO	DTXSID8024072	957-51-7	Diphenamid
BF00173506	EPA_MIXTURE_008	20	mM	20	mM	DMSO	DTXSID3024316	34014-18-1	Tebuthiuron
BF00173506	EPA_MIXTURE_008	20	mM	20	mM	DMSO	DTXSID0022519	59-30-3	Folic acid
BF00173506	EPA_MIXTURE_008	9	mM	20	mM	DMSO	DTXSID0034722	210631-68-8	Topramezone
BF00173506	EPA_MIXTURE_008	20	mM	20	mM	DMSO	DTXSID7026867	111-20-6	Decanedioic acid
BF00173506	EPA_MIXTURE_008	20	mM	20	mM	DMSO	DTXSID6024046	311-45-5	Paraoxon
BF00173506	EPA_MIXTURE_008	20	mM	20	mM	DMSO	DTXSID8032548	114369-43-6	Fenbuconazole
BF00173506	EPA_MIXTURE_008	20	mM	20	mM	DMSO	DTXSID1032648	22248-79-9	Z-Tetrachlorvinphos
BF00173506	EPA_MIXTURE_008	19	mM	20	mM	DMSO	DTXSID1047364	1075752-90-7	SSR 103800
BF00173506	EPA_MIXTURE_008	20	mM	20	mM	DMSO	DTXSID1047281	353280-07-6	CP-612372
BF00173506	EPA_MIXTURE_008	20	mM	20	mM	DMSO	DTXSID0048505	NOCAS_48505	PharmaGSID_48505
BF00173506	EPA_MIXTURE_008	20	mM	20	mM	DMSO	DTXSID4026684	101-86-0	2-Benzylideneoctanal
BF00173506	EPA_MIXTURE_008	20	mM	20	mM	DMSO	DTXSID2047276	194098-25-4	CP-409092
BF00173506	EPA_MIXTURE_008	20	mM	20	mM	DMSO	DTXSID1047366	NOCAS_47366	SAR115740
BF00173506	EPA_MIXTURE_008	20	mM	20	mM	DMSO	DTXSID5041691	35256-85-0	Butam
BF00173506	EPA_MIXTURE_008	20	mM	20	mM	DMSO	DTXSID9032537	7173-51-5	Didecyldimethylammonium chloride
BF00173506	EPA_MIXTURE_008	20	mM	20	mM	DMSO	DTXSID2037714	1987-50-4	4-Heptylphenol
BF00173506	EPA_MIXTURE_008	10	mM	20	mM	DMSO	DTXSID4020618	102676-31-3	Fadrozole hydrochloride
BF00173506	EPA_MIXTURE_008	20	mM	20	mM	DMSO	DTXSID1020144	119-53-9	Benzoin
BF00173506	EPA_MIXTURE_008	20	mM	20	mM	DMSO	DTXSID6024204	21087-64-9	Metribuzin
BF00173506	EPA_MIXTURE_008	20	mM	20	mM	DMSO	DTXSID6024048	43222-48-6	Difenzoquat metilsulfate
BF00173506	EPA_MIXTURE_008	20	mM	20	mM	DMSO	DTXSID3022409	80-09-1	4,4'-Sulfonyldiphenol
BF00173506	EPA_MIXTURE_008	20	mM	20	mM	DMSO	DTXSID6043915	630-56-8	Hydroxyprogesterone caproate
BF00173506	EPA_MIXTURE_008	20	mM	20	mM	DMSO	DTXSID6042234	29836-26-8	Octyl beta-D-glucopyranoside
BF00173506	EPA_MIXTURE_008	20	mM	20	mM	DMSO	DTXSID6043709	4449-51-8	Cyclopamine
BF00173506	EPA_MIXTURE_008	20	mM	20	mM	DMSO	DTXSID3020627	86386-73-4	Fluconazole
BF00173506	EPA_MIXTURE_008	20	mM	20	mM	DMSO	DTXSID7042190	2605-79-0	N,N-Dimethyldecylamine oxide
BF00173506	EPA_MIXTURE_008	20	mM	20	mM	DMSO	DTXSID5027770	15214-89-8	2-Acrylamido-2-methyl-1-propanesulfonic acid
BF00173506	EPA_MIXTURE_008	19	mM	20	mM	DMSO	DTXSID7042011	97-78-9	N-Dodecanoyl-N-methylglycine
BF00173506	EPA_MIXTURE_008	20	mM	20	mM	DMSO	DTXSID4022523	1085-12-7	Heptylparaben
BF00173506	EPA_MIXTURE_008	17	mM	20	mM	DMSO	DTXSID5047320	180084-01-9	SB236057A
BF00173506	EPA_MIXTURE_008	20	mM	20	mM	DMSO	DTXSID5021758	78-51-3	Tris(2-butoxyethyl) phosphate
BF00173506	EPA_MIXTURE_008	18	mM	20	mM	DMSO	DTXSID1047310	196808-45-4	Farglitazar
BF00173506	EPA_MIXTURE_008	20	mM	20	mM	DMSO	DTXSID4032532	128639-02-1	Carfentrazone-ethyl
BF00173506	EPA_MIXTURE_008	20	mM	20	mM	DMSO	DTXSID8047347	155990-20-8	SR271425
BF00173506	EPA_MIXTURE_008	21	mM	20	mM	DMSO	DTXSID0020286	95-74-9	3-Chloro-4-methylaniline
BF00173506	EPA_MIXTURE_008	20	mM	20	mM	DMSO	DTXSID1032355	81777-89-1	Clomazone
BF00173506	EPA_MIXTURE_008	20	mM	20	mM	DMSO	DTXSID4024729	10605-21-7	Carbendazim
BF00173506	EPA_MIXTURE_008	15	mM	20	mM	DMSO	DTXSID3042423	126-14-7	Sucrose octaacetate
BF00173506	EPA_MIXTURE_008	20	mM	20	mM	DMSO	DTXSID1047283	368832-42-2	CP-728663
BF00173506	EPA_MIXTURE_008	20	mM	20	mM	DMSO	DTXSID4022288	39905-57-2	4-Hexyloxyaniline
BF00173506	EPA_MIXTURE_008	20	mM	20	mM	DMSO	DTXSID6048175	151506-44-4	FR140423
BF00173506	EPA_MIXTURE_008	20	mM	20	mM	DMSO	DTXSID3020209	94-26-8	Butylparaben
BF00173506	EPA_MIXTURE_008	20	mM	20	mM	DMSO	DTXSID9047257	127308-82-1	Zamifenacin
BF00173506	EPA_MIXTURE_008	2	mM	20	mM	DMSO	DTXSID4047381	NOCAS_47381	AVE8923
BF00173506	EPA_MIXTURE_008	20	mM	20	mM	DMSO	DTXSID0020022	50594-66-6	Acifluorfen
BF00173506	EPA_MIXTURE_008	20	mM	20	mM	DMSO	DTXSID6025226	24169-02-6	Econazole nitrate
BF00173506	EPA_MIXTURE_008	20	mM	20	mM	DMSO	DTXSID3026647	99-96-7	4-Hydroxybenzoic acid
BF00173506	EPA_MIXTURE_008	20	mM	20	mM	DMSO	DTXSID5032600	113136-77-9	Cyclanilide
BF00173506	EPA_MIXTURE_008	20	mM	20	mM	DMSO	DTXSID9034365	134605-64-4	Butafenacil
BF00173506	EPA_MIXTURE_008	20	mM	20	mM	DMSO	DTXSID2047359	298198-52-4	SSR180711
BF00173506	EPA_MIXTURE_008	20	mM	20	mM	DMSO	DTXSID2047272	249296-43-3	CJ-013610
BF00173506	EPA_MIXTURE_008	20	mM	20	mM	DMSO	DTXSID1034210	29091-21-2	Prodiamine
BF00173506	EPA_MIXTURE_008	20	mM	20	mM	DMSO	DTXSID9048512	107071-66-9	Ro 23-7637
BF00173506	EPA_MIXTURE_008	20	mM	20	mM	DMSO	DTXSID4048519	686756-87-6	PharmaGSID_48519
BF00173506	EPA_MIXTURE_008	20	mM	20	mM	DMSO	DTXSID6047288	203942-49-8	UK-337312
BF00173506	EPA_MIXTURE_008	20	mM	20	mM	DMSO	DTXSID2022048	525-82-6	Flavone
BF00173506	EPA_MIXTURE_008	20	mM	20	mM	DMSO	DTXSID4024193	94-81-5	MCPB
BF00173506	EPA_MIXTURE_008	20	mM	20	mM	DMSO	DTXSID6022341	1610-18-0	Prometon
BF00173506	EPA_MIXTURE_008	20	mM	20	mM	DMSO	DTXSID6026080	100-21-0	Terephthalic acid
BF00173506	EPA_MIXTURE_008	20	mM	20	mM	DMSO	DTXSID5047374	NOCAS_47374	SSR161421
BF00173506	EPA_MIXTURE_008	20	mM	20	mM	DMSO	DTXSID3021518	110-17-8	Fumaric acid
BF00173506	EPA_MIXTURE_008	20	mM	20	mM	DMSO	DTXSID1022265	15972-60-8	Alachlor
BF00173506	EPA_MIXTURE_008	20	mM	20	mM	DMSO	DTXSID0047371	725228-45-5	AVE5638
BF00173506	EPA_MIXTURE_008	20	mM	20	mM	DMSO	DTXSID3047261	177785-47-6	PharmaGSID_47261
BF00173506	EPA_MIXTURE_008	20	mM	20	mM	DMSO	DTXSID4032372	119446-68-3	Difenoconazole
BF00173506	EPA_MIXTURE_008	20	mM	20	mM	DMSO	DTXSID3024235	85509-19-9	Flusilazole
BF00173506	EPA_MIXTURE_008	18	mM	20	mM	DMSO	DTXSID5047322	200940-23-4	SB243213A
BF00173506	EPA_MIXTURE_008	18	mM	20	mM	DMSO	DTXSID4047385	NOCAS_47385	SAR377142
BF00173506	EPA_MIXTURE_008	20	mM	20	mM	DMSO	DTXSID5024211	15299-99-7	Napropamide
BF00173506	EPA_MIXTURE_008	20	mM	20	mM	DMSO	DTXSID3020625	98319-26-7	Finasteride
BF00173506	EPA_MIXTURE_008	20	mM	20	mM	DMSO	DTXSID2020921	91-59-8	2-Naphthylamine
BF00173506	EPA_MIXTURE_008	20	mM	20	mM	DMSO	DTXSID1047576	486-56-6	Cotinine
BF00173506	EPA_MIXTURE_008	20	mM	20	mM	DMSO	DTXSID5044788	120-18-3	Naphthalene-2-sulfonic acid
BF00173506	EPA_MIXTURE_008	11	mM	20	mM	DMSO	DTXSID2041250	14233-37-5	1,4-Bis(N-isopropylamino)anthraquinone
BF00173506	EPA_MIXTURE_008	20	mM	20	mM	DMSO	DTXSID8025595	110-26-9	N,N'-Methylenebisacrylamide
BF00173506	EPA_MIXTURE_008	20	mM	20	mM	DMSO	DTXSID4020379	53-43-0	Dehydroepiandrosterone
BF00173506	EPA_MIXTURE_008	20	mM	20	mM	DMSO	DTXSID3040776	654055-01-3	Morin hydrate
BF00173506	EPA_MIXTURE_008	20	mM	20	mM	DMSO	DTXSID3041665	122-18-9	Benzylhexadecyldimethylammonium chloride
BF00173506	EPA_MIXTURE_008	20	mM	20	mM	DMSO	DTXSID7044716	6837-24-7	1-Cyclohexylpyrrolidin-2-one
BF00173506	EPA_MIXTURE_008	20	mM	20	mM	DMSO	DTXSID3024100	84-72-0	Ethyl phthalyl ethyl glycolate
BF00173506	EPA_MIXTURE_008	20	mM	20	mM	DMSO	DTXSID4046999	1466-76-8	2,6-Dimethoxybenzoic acid
BF00173506	EPA_MIXTURE_008	20	mM	20	mM	DMSO	DTXSID7022172	2032-59-9	Aminocarb
BF00173506	EPA_MIXTURE_008	20	mM	20	mM	DMSO	DTXSID7040289	4684-94-0	6-Chloro-2-picolinic acid
BF00173506	EPA_MIXTURE_008	20	mM	20	mM	DMSO	DTXSID5029136	101-11-1	3-((Ethylphenylamino)methyl)benzenesulfonic acid
BF00173506	EPA_MIXTURE_008	20	mM	20	mM	DMSO	DTXSID9032406	25954-13-6	Fosamine ammonium
BF00173506	EPA_MIXTURE_008	20	mM	20	mM	DMSO	DTXSID4047173	867-81-2	Sodium pantothenate
BF00173506	EPA_MIXTURE_008	20	mM	20	mM	DMSO	DTXSID6020062	99-57-0	2-Amino-4-nitrophenol
BF00173506	EPA_MIXTURE_008	20	mM	20	mM	DMSO	DTXSID4023622	63-74-1	Sulfanilamide
BF00173506	EPA_MIXTURE_008	20	mM	20	mM	DMSO	DTXSID8022082	614-80-2	2-Acetamidophenol
BF00173506	EPA_MIXTURE_008	10	mM	20	mM	DMSO	DTXSID9047253	199171-88-5	CP-401387
BF00173506	EPA_MIXTURE_008	20	mM	20	mM	DMSO	DTXSID0042084	4849-32-5	Karbutilate
BF00173506	EPA_MIXTURE_008	20	mM	20	mM	DMSO	DTXSID2044844	15930-66-2	3-(Octyloxy)propan-1-amine
BF00173506	EPA_MIXTURE_008	20	mM	20	mM	DMSO	DTXSID1021116	62-44-2	Phenacetin
BF00173506	EPA_MIXTURE_008	20	mM	20	mM	DMSO	DTXSID9025588	92-48-8	6-Methyl coumarin
BF00173506	EPA_MIXTURE_008	20	mM	20	mM	DMSO	DTXSID1024916	2873-97-4	Diacetone acrylamide
BF00173506	EPA_MIXTURE_008	20	mM	20	mM	DMSO	DTXSID5021627	1917-15-3	5-Methyl-2-furancarboxylic acid
BF00173506	EPA_MIXTURE_008	20	mM	20	mM	DMSO	DTXSID3041619	71626-11-4	Benalaxyl
BF00173506	EPA_MIXTURE_008	20	mM	20	mM	DMSO	DTXSID6020193	33229-34-4	HC Blue 2
BF00173506	EPA_MIXTURE_008	20	mM	20	mM	DMSO	DTXSID7044893	25354-97-6	2-Hexyldecanoic acid
BF00173506	EPA_MIXTURE_008	21	mM	20	mM	DMSO	DTXSID0021339	52-24-4	Thiotepa
BF00173506	EPA_MIXTURE_008	20	mM	20	mM	DMSO	DTXSID4020088	15879-93-3	Chloralose
BF00173506	EPA_MIXTURE_008	20	mM	20	mM	DMSO	DTXSID5025861	133-18-6	Phenethyl anthranilate
BF00173506	EPA_MIXTURE_008	20	mM	20	mM	DMSO	DTXSID2020892	443-48-1	Metronidazole
BF00173506	EPA_MIXTURE_008	19	mM	20	mM	DMSO	DTXSID5026120	54827-17-7	3,3',5,5'-Tetramethylbenzidine
BF00173506	EPA_MIXTURE_008	20	mM	20	mM	DMSO	DTXSID3020962	91-23-6	1-Methoxy-2-nitrobenzene
BF00173506	EPA_MIXTURE_008	20	mM	20	mM	DMSO	DTXSID7041629	135-57-9	2,2'-Dibenzoylaminodiphenyl disulfide
BF00173506	EPA_MIXTURE_008	20	mM	20	mM	DMSO	DTXSID0024761	108-42-9	3-Chloroaniline
BF00173506	EPA_MIXTURE_008	20	mM	20	mM	DMSO	DTXSID6020648	54-31-9	Furosemide
BF00173506	EPA_MIXTURE_008	17	mM	20	mM	DMSO	DTXSID0043765	630-60-4	Ouabain
BF00173506	EPA_MIXTURE_008	20	mM	20	mM	DMSO	DTXSID5037498	2642-71-9	Azinphos-ethyl
BF00173506	EPA_MIXTURE_008	20	mM	20	mM	DMSO	DTXSID1041502	497-39-2	4,6-Di-tert-butyl-m-cresol
BF00173506	EPA_MIXTURE_008	20	mM	20	mM	DMSO	DTXSID2032631	77732-09-3	Oxadixyl
BF00173506	EPA_MIXTURE_008	20	mM	20	mM	DMSO	DTXSID6041268	103112-35-2	Fenchlorazole-ethyl
BF00173506	EPA_MIXTURE_008	20	mM	20	mM	DMSO	DTXSID7020504	58-15-1	4-Dimethylaminoantipyrine
BF00173506	EPA_MIXTURE_008	20	mM	20	mM	DMSO	DTXSID0041985	4776-06-1	Fluorosalan
BF00173506	EPA_MIXTURE_008	20	mM	20	mM	DMSO	DTXSID9040683	595-33-5	Megestrol acetate
BF00173506	EPA_MIXTURE_008	20	mM	20	mM	DMSO	DTXSID4047412	104-27-8	1-(4-Methoxyphenyl)-1-pentene-3-one
BF00173506	EPA_MIXTURE_008	20	mM	20	mM	DMSO	DTXSID8022741	339-43-5	Carbutamide
BF00173506	EPA_MIXTURE_008	20	mM	20	mM	DMSO	DTXSID5044528	125-13-3	Oxyphenisatin
BF00173506	EPA_MIXTURE_008	20	mM	20	mM	DMSO	DTXSID1040324	64-00-6	m-Cumenyl methylcarbamate
BF00173506	EPA_MIXTURE_008	20	mM	20	mM	DMSO	DTXSID6038877	135-62-6	3-Hydroxy-2-naphthoic o-anisidide
BF00173506	EPA_MIXTURE_008	19	mM	20	mM	DMSO	DTXSID8029868	134523-00-5	Atorvastatin
BF00173506	EPA_MIXTURE_008	20	mM	20	mM	DMSO	DTXSID7022120	786-19-6	Carbophenothion
BF00173506	EPA_MIXTURE_008	20	mM	20	mM	DMSO	DTXSID6044644	304-17-6	N-Isopropylphthalimide
BF00173506	EPA_MIXTURE_008	20	mM	20	mM	DMSO	DTXSID7021603	10030-73-6	(E)-Hexadec-9-enoic acid
BF00173506	EPA_MIXTURE_008	20	mM	20	mM	DMSO	DTXSID4044747	94317-64-3	N-Butylphosphorothioic triamide
BF00173506	EPA_MIXTURE_008	20	mM	20	mM	DMSO	DTXSID7023938	85-70-1	Butylphthalyl butylglycolate
BF00173506	EPA_MIXTURE_008	20	mM	20	mM	DMSO	DTXSID4027579	4792-15-8	Pentaethylene glycol
BF00173506	EPA_MIXTURE_008	20	mM	20	mM	DMSO	DTXSID7042352	13457-18-6	Pyrazophos
BF00173506	EPA_MIXTURE_008	20	mM	20	mM	DMSO	DTXSID7020007	968-81-0	Acetohexamide
BF00173506	EPA_MIXTURE_008	20	mM	20	mM	DMSO	DTXSID2027620	6375-47-9	N-(3-Amino-4-methoxyphenyl)acetamide
BF00173506	EPA_MIXTURE_008	20	mM	20	mM	DMSO	DTXSID8021359	64-77-7	Tolbutamide
BF00173506	EPA_MIXTURE_008	14	mM	20	mM	DMSO	DTXSID8023214	51-48-9	Levothyroxine
BF00173506	EPA_MIXTURE_008	20	mM	20	mM	DMSO	DTXSID8020331	52214-84-3	Ciprofibrate
BF00173506	EPA_MIXTURE_008	20	mM	20	mM	DMSO	DTXSID0022563	54965-21-8	Albendazole
BF00173506	EPA_MIXTURE_008	20	mM	20	mM	DMSO	DTXSID7031531	129-73-7	Leucomalachite green
BF00173506	EPA_MIXTURE_008	20	mM	20	mM	DMSO	DTXSID3029869	41859-67-0	Bezafibrate
BF00173506	EPA_MIXTURE_008	20	mM	20	mM	DMSO	DTXSID5047112	3282-73-3	Didodecyldimethylammonium bromide
BF00173506	EPA_MIXTURE_008	20	mM	20	mM	DMSO	DTXSID9044613	2094-98-6	1,1'-Diazene-1,2-diyldicyclohexanecarbonitrile
BF00173506	EPA_MIXTURE_008	20	mM	20	mM	DMSO	DTXSID7047697	63449-68-3	Naphthalen-2-yl 2-aminobenzoate
BF00173506	EPA_MIXTURE_008	20	mM	20	mM	DMSO	DTXSID8044913	3179-80-4	N-[3-(Dimethylamino)propyl]dodecanamide
BF00173506	EPA_MIXTURE_008	20	mM	20	mM	DMSO	DTXSID2022707	36505-84-7	Buspirone
BF00173506	EPA_MIXTURE_008	20	mM	20	mM	DMSO	DTXSID1020803	71125-38-7	Meloxicam
BF00173506	EPA_MIXTURE_008	20	mM	20	mM	DMSO	DTXSID3020912	389-08-2	Nalidixic acid
BF00173506	EPA_MIXTURE_008	20	mM	20	mM	DMSO	DTXSID1038822	4196-89-8	Neopentyl glycol dibenzoate
BF00173506	EPA_MIXTURE_008	20	mM	20	mM	DMSO	DTXSID6021373	396-01-0	Triamterene
BF00173506	EPA_MIXTURE_008	20	mM	20	mM	DMSO	DTXSID4041494	83164-33-4	Diflufenican
BF00173506	EPA_MIXTURE_008	20	mM	20	mM	DMSO	DTXSID1044514	1083-27-8	Hexylparaben
BF00173506	EPA_MIXTURE_008	20	mM	20	mM	DMSO	DTXSID7020265	56-75-7	Chloramphenicol
BF00173506	EPA_MIXTURE_008	20	mM	20	mM	DMSO	DTXSID1021617	99-04-7	3-Methylbenzoic acid
BF00173506	EPA_MIXTURE_008	20	mM	20	mM	DMSO	DTXSID3021801	91-88-3	2-(N-Ethyl-m-toluidino)ethanol
BF00173506	EPA_MIXTURE_008	20	mM	20	mM	DMSO	DTXSID7044342	203313-25-1	Spirotetramat
BF00173506	EPA_MIXTURE_008	20	mM	20	mM	DMSO	DTXSID8041799	5836-29-3	Coumatetralyl
BF00173506	EPA_MIXTURE_008	20	mM	20	mM	DMSO	DTXSID9022736	22232-54-8	Carbimazole
BF00173506	EPA_MIXTURE_008	20	mM	20	mM	DMSO	DTXSID5037731	3236-71-3	4,4'-(9H-Fluorene-9,9-diyl)diphenol
BF00173506	EPA_MIXTURE_008	20	mM	20	mM	DMSO	DTXSID2041759	124-03-8	Ethylhexadecyldimethylammonium bromide
BF00173506	EPA_MIXTURE_008	20	mM	20	mM	DMSO	DTXSID9026130	1941-30-6	Tetrapropylammonium bromide
BF00173506	EPA_MIXTURE_008	20	mM	20	mM	DMSO	DTXSID0041987	61213-25-0	Flurochloridone
BF00173506	EPA_MIXTURE_008	20	mM	20	mM	DMSO	DTXSID1036541	145-13-1	Pregnenolone
BF00173506	EPA_MIXTURE_008	20	mM	20	mM	DMSO	DTXSID2044268	83881-52-1	Cetirizine dihydrochloride
BF00173506	EPA_MIXTURE_008	20	mM	20	mM	DMSO	DTXSID1021299	569-57-3	Chlorotrianisene
BF00173506	EPA_MIXTURE_008	20	mM	20	mM	DMSO	DTXSID2020424	2164-09-2	Chloranocryl
BF00173506	EPA_MIXTURE_008	20	mM	20	mM	DMSO	DTXSID5041778	5836-10-2	Chloropropylate
BF00173506	EPA_MIXTURE_008	20	mM	20	mM	DMSO	DTXSID7022673	2152-44-5	Betamethasone valerate
BF00173506	EPA_MIXTURE_008	20	mM	20	mM	DMSO	DTXSID9042259	80-00-2	4-Chlorophenyl phenyl sulfone
BF00173506	EPA_MIXTURE_008	20	mM	20	mM	DMSO	DTXSID0023377	24526-64-5	Nomifensine
BF00173506	EPA_MIXTURE_008	20	mM	20	mM	DMSO	DTXSID7040990	555-60-2	Carbonyl cyanide chlorophenylhydrazone
BF00173506	EPA_MIXTURE_008	20	mM	20	mM	DMSO	DTXSID5044366	1119-94-4	Dodecyltrimethylammonium bromide
BF00173506	EPA_MIXTURE_008	20	mM	20	mM	DMSO	DTXSID9044790	1205-64-7	3-Methyl-N-phenylaniline
BF00173506	EPA_MIXTURE_008	20	mM	20	mM	DMSO	DTXSID0044862	1852-04-6	Undecanedioic acid
BF00173506	EPA_MIXTURE_008	20	mM	20	mM	DMSO	DTXSID8041242	68052-23-3	2,2,4-Trimethylpentane-1,3-diyl dibenzoate
BF00173506	EPA_MIXTURE_008	20	mM	20	mM	DMSO	DTXSID5042297	23505-41-1	Pirimiphos-ethyl
BF00173506	EPA_MIXTURE_008	20	mM	20	mM	DMSO	DTXSID8038857	71868-10-5	2-Methyl-4'-(methylthio)-2-morpholinopropiophenone
BF00173506	EPA_MIXTURE_008	20	mM	20	mM	DMSO	DTXSID3022667	378-44-9	Betamethasone
BF00173506	EPA_MIXTURE_008	20	mM	20	mM	DMSO	DTXSID5020497	551-92-8	1,2-Dimethyl-5-nitroimidazole
BF00173506	EPA_MIXTURE_008	20	mM	20	mM	DMSO	DTXSID4044616	2304-30-5	Tetrabutylphosphonium chloride
BF00173506	EPA_MIXTURE_008	20	mM	20	mM	DMSO	DTXSID8047050	4674-50-4	Nootkatone
BF00173506	EPA_MIXTURE_008	20	mM	20	mM	DMSO	DTXSID7041336	136-32-3	2,4,5-Trichlorophenol sodium salt
BF00173506	EPA_MIXTURE_008	20	mM	20	mM	DMSO	DTXSID4044668	41532-84-7	1,1,2-Trimethyl-1H-benzo[e]indole
BF00173506	EPA_MIXTURE_008	20	mM	20	mM	DMSO	DTXSID2024585	85-02-9	Benzo(f)quinoline
BF00173506	EPA_MIXTURE_008	20	mM	20	mM	DMSO	DTXSID9044821	5232-99-5	Ethyl 2-cyano-3,3-diphenylacrylate
BF00173506	EPA_MIXTURE_008	20	mM	20	mM	DMSO	DTXSID1044481	23847-08-7	1,1'-Disulfanediyldiazepan-2-one
BF00173506	EPA_MIXTURE_008	20	mM	20	mM	DMSO	DTXSID0034776	57018-04-9	Tolclofos-methyl
BF00173506	EPA_MIXTURE_008	20	mM	20	mM	DMSO	DTXSID9023706	13647-35-3	Trilostane
BF00173506	EPA_MIXTURE_008	20	mM	20	mM	DMSO	DTXSID0040674	67-73-2	Fluocinolone acetonide
BF00173506	EPA_MIXTURE_008	20	mM	20	mM	DMSO	DTXSID8021721	60-41-3	Strychnine hemisulphate salt
BF00173506	EPA_MIXTURE_008	17	mM	20	mM	DMSO	DTXSID2021367	89778-27-8	Toremifene citrate
BF00173506	EPA_MIXTURE_008	20	mM	20	mM	DMSO	DTXSID8022161	1689-83-4	Ioxynil
BF00173506	EPA_MIXTURE_008	20	mM	20	mM	DMSO	DTXSID2026232	1421-63-2	2',4',5'-Trihydroxybutyrophenone
BF00173506	EPA_MIXTURE_008	20	mM	20	mM	DMSO	DTXSID3042477	2398-96-1	Tolnaftate
BF00173506	EPA_MIXTURE_008	20	mM	20	mM	DMSO	DTXSID7040738	113-52-0	Imipramine hydrochloride
BF00173506	EPA_MIXTURE_008	20	mM	20	mM	DMSO	DTXSID2021236	2871-01-4	HC Red 3
BF00173506	EPA_MIXTURE_008	20	mM	20	mM	DMSO	DTXSID6021371	76-25-5	Triamcinolone acetonide
BF00173506	EPA_MIXTURE_008	20	mM	20	mM	DMSO	DTXSID2034338	12771-68-5	Ancymidol
BF00173506	EPA_MIXTURE_008	20	mM	20	mM	DMSO	DTXSID6021292	127-69-5	Sulfisoxazole
BF00173506	EPA_MIXTURE_008	20	mM	20	mM	DMSO	DTXSID8032623	133-32-4	Indole-3-butyric acid
BF00173506	EPA_MIXTURE_008	20	mM	20	mM	DMSO	DTXSID4026266	839-90-7	Tris(2-hydroxyethyl) isocyanurate
BF00173506	EPA_MIXTURE_008	20	mM	20	mM	DMSO	DTXSID7041966	52-85-7	Famphur
BF00173506	EPA_MIXTURE_008	20	mM	20	mM	DMSO	DTXSID1040619	153559-49-0	Bexarotene
BF00173506	EPA_MIXTURE_008	20	mM	20	mM	DMSO	DTXSID3042633	17321-77-6	Clomipramine hydrochloride
BF00173506	EPA_MIXTURE_008	20	mM	20	mM	DMSO	DTXSID8047551	5579-78-2	epsilon-Decalactone
BF00173506	EPA_MIXTURE_008	20	mM	20	mM	DMSO	DTXSID9025536	583-39-1	2-Mercaptobenzimidazole
BF00173506	EPA_MIXTURE_008	20	mM	20	mM	DMSO	DTXSID9032329	741-58-2	Bensulide
BF00173506	EPA_MIXTURE_008	20	mM	20	mM	DMSO	DTXSID2034881	124495-18-7	Quinoxyfen
BF00173506	EPA_MIXTURE_008	20	mM	20	mM	DMSO	DTXSID2021781	84-74-2	Dibutyl phthalate
BF00173506	EPA_MIXTURE_008	20	mM	20	mM	DMSO	DTXSID4044400	1643-19-2	Tetrabutylammonium bromide
BF00173506	EPA_MIXTURE_008	20	mM	20	mM	DMSO	DTXSID5034355	64628-44-0	Triflumuron
BF00173506	EPA_MIXTURE_008	20	mM	20	mM	DMSO	DTXSID9026261	13674-87-8	Tris(1,3-dichloro-2-propyl) phosphate
BF00173506	EPA_MIXTURE_008	16	mM	20	mM	DMSO	DTXSID0044733	827-95-2	Sodium 3-nitrobenzoate
BF00173506	EPA_MIXTURE_008	12	mM	20	mM	DMSO	DTXSID8044751	98-44-2	2-Aminobenzene-1,4-disulfonic acid
BF00173506	EPA_MIXTURE_008	16	mM	20	mM	DMSO	DTXSID6047311	NOCAS_47311	GSK163929B
BF00173506	EPA_MIXTURE_008	20	mM	20	mM	DMSO	DTXSID0047662	140923-17-7	Iprovalicarb
BF00173506	EPA_MIXTURE_008	13	mM	20	mM	DMSO	DTXSID1042077	34123-59-6	Isoproturon
BF00173506	EPA_MIXTURE_008	13	mM	20	mM	DMSO	DTXSID8040727	76674-21-0	Flutriafol
BF00173506	EPA_MIXTURE_008	15	mM	20	mM	DMSO	DTXSID2041460	454-92-2	3-(Trifluoromethyl)benzoic acid
BF00173506	EPA_MIXTURE_008	4	mM	20	mM	DMSO	DTXSID7044633	26807-65-8	Indapamide
BF00173506	EPA_MIXTURE_008	14	mM	20	mM	DMSO	DTXSID7041540	618-88-2	5-Nitroisophthalic acid
BF00173506	EPA_MIXTURE_008	12	mM	20	mM	DMSO	DTXSID1037272	321-64-2	Tacrine
BF00173506	EPA_MIXTURE_008	14	mM	20	mM	DMSO	DTXSID7021780	84-66-2	Diethyl phthalate
BF00173506	EPA_MIXTURE_008	12	mM	20	mM	DMSO	DTXSID3037250	51803-78-2	Nimesulide
BF00173506	EPA_MIXTURE_008	20	mM	20	mM	DMSO	DTXSID5044491	7491-74-9	Piracetam
BF00173506	EPA_MIXTURE_008	20	mM	20	mM	DMSO	DTXSID9020247	63-25-2	Carbaryl
BF00173506	EPA_MIXTURE_008	4	mM	20	mM	DMSO	DTXSID2041884	63837-33-2	Diofenolan
BF00173506	EPA_MIXTURE_008	14	mM	20	mM	DMSO	DTXSID6040664	483-63-6	Crotamiton
BF00173506	EPA_MIXTURE_008	16	mM	20	mM	DMSO	DTXSID0037570	18691-97-9	Methabenzthiazuron
BF00173506	EPA_MIXTURE_008	20	mM	20	mM	DMSO	DTXSID0047450	94-97-3	5-Chlorobenzotriazole
BF00173506	EPA_MIXTURE_008	8	mM	20	mM	DMSO	DTXSID0040676	29094-61-9	Glipizide
BF00173506	EPA_MIXTURE_008	16	mM	20	mM	DMSO	DTXSID2041468	2327-02-8	3,4-Dichlorophenylurea
BF00173506	EPA_MIXTURE_008	16	mM	20	mM	DMSO	DTXSID0037493	1610-17-9	Atraton
BF00173506	EPA_MIXTURE_008	15	mM	20	mM	DMSO	DTXSID7041627	30391-89-0	2-Amino-N-(1-methylethyl)benzamide
BF00173506	EPA_MIXTURE_008	19	mM	20	mM	DMSO	DTXSID2047353	NOCAS_47353	SSR 241586 HCl
BF00173506	EPA_MIXTURE_008	20	mM	20	mM	DMSO	DTXSID3041613	60207-31-0	Azaconazole
BF00173506	EPA_MIXTURE_008	20	mM	20	mM	DMSO	DTXSID4022527	94-13-3	Propylparaben
BF00173506	EPA_MIXTURE_008	16	mM	20	mM	DMSO	DTXSID0044737	86-16-8	4-(2,5-Diethoxy-4-nitrophenyl)morpholine
BF00173506	EPA_MIXTURE_008	4	mM	20	mM	DMSO	DTXSID1044647	306-07-0	Pargyline hydrochloride
BF00173506	EPA_MIXTURE_008	4	mM	20	mM	DMSO	DTXSID8044626	25332-39-2	Trazodone hydrochloride
BF00173506	EPA_MIXTURE_008	4	mM	20	mM	DMSO	DTXSID6042157	3060-89-7	Metobromuron
BF00173506	EPA_MIXTURE_008	14	mM	20	mM	DMSO	DTXSID4037617	2631-37-0	Promecarb
BF00173506	EPA_MIXTURE_008	18	mM	20	mM	DMSO	DTXSID1020982	504-88-1	3-Nitropropionic acid
BF00173506	EPA_MIXTURE_008	5	mM	20	mM	DMSO	DTXSID6037697	60397-77-5	N-(2,4-Dimethylphenyl)formamide
BF00173506	EPA_MIXTURE_008	14	mM	20	mM	DMSO	DTXSID0044941	4273-98-7	2-(Phenylsulfonyl)aniline
BF00173506	EPA_MIXTURE_008	4	mM	20	mM	DMSO	DTXSID5025021	84-61-7	Dicyclohexyl phthalate
BF00173506	EPA_MIXTURE_008	13	mM	20	mM	DMSO	DTXSID8037596	1014-70-6	Simetryn
BF00173506	EPA_MIXTURE_008	16	mM	20	mM	DMSO	DTXSID3041372	88-86-8	2,5-Dichloro-3-nitrobenzoic acid
BF00173506	EPA_MIXTURE_008	16	mM	20	mM	DMSO	DTXSID0044785	119-17-5	3-(3-Methyl-5-oxo-4,5-dihydro-1H-pyrazol-1-yl)benzenesulfonic acid

## Sheet: ENTACT 508
Aliquot_Plate_Barcode	Aliquot_Well_ID	Aliquot_Concentration	Aliquot_Concentration_Unit	Target_Concentration	Target_Concentration_Unit	Aliquot_Solvent	DTXSID	CASRN	Preferred_Name
BF00173508	EPA_MIXTURE_010	20	mM	20	mM	DMSO	DTXSID3024154	36734-19-7	Iprodione
BF00173508	EPA_MIXTURE_010	20	mM	20	mM	DMSO	DTXSID0021125	77-09-8	Phenolphthalein
BF00173508	EPA_MIXTURE_010	20	mM	20	mM	DMSO	DTXSID3020205	85-68-7	Benzyl butyl phthalate
BF00173508	EPA_MIXTURE_010	20	mM	20	mM	DMSO	DTXSID8024317	5902-51-2	Terbacil
BF00173508	EPA_MIXTURE_010	20	mM	20	mM	DMSO	DTXSID7020764	101-21-3	Chlorpropham
BF00173508	EPA_MIXTURE_010	20	mM	20	mM	DMSO	DTXSID1021166	51-03-6	Piperonyl butoxide
BF00173508	EPA_MIXTURE_010	20	mM	20	mM	DMSO	DTXSID7020768	520-18-3	Kaempferol
BF00173508	EPA_MIXTURE_010	20	mM	20	mM	DMSO	DTXSID2040363	83657-24-3	Diniconazole
BF00173508	EPA_MIXTURE_010	20	mM	20	mM	DMSO	DTXSID8024151	35554-44-0	Imazalil
BF00173508	EPA_MIXTURE_010	17	mM	20	mM	DMSO	DTXSID1048172	NOCAS_48172	PharmaGSID_48172
BF00173508	EPA_MIXTURE_010	20	mM	20	mM	DMSO	DTXSID4034653	79983-71-4	Hexaconazole
BF00173508	EPA_MIXTURE_010	20	mM	20	mM	DMSO	DTXSID2020006	103-90-2	Acetaminophen
BF00173508	EPA_MIXTURE_010	20	mM	20	mM	DMSO	DTXSID4022367	53-16-7	Estrone
BF00173508	EPA_MIXTURE_010	20	mM	20	mM	DMSO	DTXSID9032113	107534-96-3	Tebuconazole
BF00173508	EPA_MIXTURE_010	20	mM	20	mM	DMSO	DTXSID2022381	84-16-2	meso-Hexestrol
BF00173508	EPA_MIXTURE_010	20	mM	20	mM	DMSO	DTXSID3022536	599-64-4	4-Cumylphenol
BF00173508	EPA_MIXTURE_010	20	mM	20	mM	DMSO	DTXSID4022448	51218-45-2	Metolachlor
BF00173508	EPA_MIXTURE_010	20	mM	20	mM	DMSO	DTXSID5027774	15708-41-5	Ethylenediaminetetraacetic acid ferric sodium salt
BF00173508	EPA_MIXTURE_010	20	mM	20	mM	DMSO	DTXSID0032605	51338-27-3	Diclofop-methyl
BF00173508	EPA_MIXTURE_010	20	mM	20	mM	DMSO	DTXSID8020961	100-01-6	4-Nitroaniline
BF00173508	EPA_MIXTURE_010	20	mM	20	mM	DMSO	DTXSID2026529	88-60-8	2-tert-Butyl-5-methylphenol
BF00173508	EPA_MIXTURE_010	20	mM	20	mM	DMSO	DTXSID2034625	361377-29-9	Fluoxastrobin
BF00173508	EPA_MIXTURE_010	20	mM	20	mM	DMSO	DTXSID0020232	58-08-2	Caffeine
BF00173508	EPA_MIXTURE_010	17	mM	20	mM	DMSO	DTXSID1021087	604-75-1	Oxazepam
BF00173508	EPA_MIXTURE_010	20	mM	20	mM	DMSO	DTXSID5034303	81406-37-3	Fluroxypyr-meptyl
BF00173508	EPA_MIXTURE_010	20	mM	20	mM	DMSO	DTXSID6024466	150-13-0	4-Aminobenzoic acid
BF00173508	EPA_MIXTURE_010	20	mM	20	mM	DMSO	DTXSID2026602	96-76-4	2,4-Di-tert-butylphenol
BF00173508	EPA_MIXTURE_010	20	mM	20	mM	DMSO	DTXSID8024157	33820-53-0	Isopropalin
BF00173508	EPA_MIXTURE_010	20	mM	20	mM	DMSO	DTXSID4040002	131-70-4	Monobutyl phthalate
BF00173508	EPA_MIXTURE_010	20	mM	20	mM	DMSO	DTXSID2020420	23950-58-5	Propyzamide
BF00173508	EPA_MIXTURE_010	20	mM	20	mM	DMSO	DTXSID2020890	56-04-2	6-Methyl-2-thiouracil
BF00173508	EPA_MIXTURE_010	20	mM	20	mM	DMSO	DTXSID8020628	2164-17-2	Fluometuron
BF00173508	EPA_MIXTURE_010	20	mM	20	mM	DMSO	DTXSID6047363	139290-65-6	Volinanserin
BF00173508	EPA_MIXTURE_010	20	mM	20	mM	DMSO	DTXSID3020207	88-85-7	Dinoseb
BF00173508	EPA_MIXTURE_010	20	mM	20	mM	DMSO	DTXSID3025178	102-06-7	1,3-Diphenylguanidine
BF00173508	EPA_MIXTURE_010	20	mM	20	mM	DMSO	DTXSID8037752	744-45-6	Diphenyl isophthalate
BF00173508	EPA_MIXTURE_010	10	mM	20	mM	DMSO	DTXSID8047264	171866-31-2	CP-283097
BF00173508	EPA_MIXTURE_010	20	mM	20	mM	DMSO	DTXSID8047268	104795-68-8	CI-959
BF00173508	EPA_MIXTURE_010	20	mM	20	mM	DMSO	DTXSID2047309	162706-14-1	UK-156819
BF00173508	EPA_MIXTURE_010	20	mM	20	mM	DMSO	DTXSID4022446	2467-02-9	2,2'-Bisphenol F
BF00173508	EPA_MIXTURE_010	20	mM	20	mM	DMSO	DTXSID9047540	6344-67-8	3-Hydroxyfluorene
BF00173508	EPA_MIXTURE_010	20	mM	20	mM	DMSO	DTXSID8023848	34256-82-1	Acetochlor
BF00173508	EPA_MIXTURE_010	20	mM	20	mM	DMSO	DTXSID0021123	57-30-7	Phenobarbital sodium
BF00173508	EPA_MIXTURE_010	20	mM	20	mM	DMSO	DTXSID5026706	104-66-5	1,2-Diphenoxyethane
BF00173508	EPA_MIXTURE_010	20	mM	20	mM	DMSO	DTXSID4032619	112226-61-6	Halofenozide
BF00173508	EPA_MIXTURE_010	20	mM	20	mM	DMSO	DTXSID1027479	2440-22-4	2-(2H-Benzotriazol-2-yl)-4-methylphenol
BF00173508	EPA_MIXTURE_010	20	mM	20	mM	DMSO	DTXSID9047542	117428-22-5	Picoxystrobin
BF00173508	EPA_MIXTURE_010	20	mM	20	mM	DMSO	DTXSID6021793	90-15-3	1-Naphthol
BF00173508	EPA_MIXTURE_010	20	mM	20	mM	DMSO	DTXSID7021152	92-69-3	4-Phenylphenol
BF00173508	EPA_MIXTURE_010	20	mM	20	mM	DMSO	DTXSID4036435	2687-94-7	N-Octyl-2-pyrrolidone
BF00173508	EPA_MIXTURE_010	20	mM	20	mM	DMSO	DTXSID8029105	70-55-3	4-Toluenesulfonamide
BF00173508	EPA_MIXTURE_010	20	mM	20	mM	DMSO	DTXSID9022366	50-27-1	Estriol
BF00173508	EPA_MIXTURE_010	20	mM	20	mM	DMSO	DTXSID6040747	68-96-2	17alpha-Hydroxyprogesterone
BF00173508	EPA_MIXTURE_010	20	mM	20	mM	DMSO	DTXSID5033836	104-40-5	4-Nonylphenol
BF00173508	EPA_MIXTURE_010	20	mM	20	mM	DMSO	DTXSID4021268	122-34-9	Simazine
BF00173508	EPA_MIXTURE_010	20	mM	20	mM	DMSO	DTXSID7026368	69-72-7	Salicylic acid
BF00173508	EPA_MIXTURE_010	20	mM	20	mM	DMSO	DTXSID1020069	97-56-3	2-Amino-5-azotoluene
BF00173508	EPA_MIXTURE_010	20	mM	20	mM	DMSO	DTXSID5027061	135-19-3	2-Naphthalenol
BF00173508	EPA_MIXTURE_010	20	mM	20	mM	DMSO	DTXSID2025892	90-30-2	N-Phenyl-1-naphthylamine
BF00173508	EPA_MIXTURE_010	19	mM	20	mM	DMSO	DTXSID8042507	64-10-8	1-Phenylurea
BF00173508	EPA_MIXTURE_010	20	mM	20	mM	DMSO	DTXSID6021824	97-23-4	Dichlorophen
BF00173508	EPA_MIXTURE_010	20	mM	20	mM	DMSO	DTXSID6041422	87-01-4	7-(Dimethylamino)-4-methylcoumarin
BF00173508	EPA_MIXTURE_010	20	mM	20	mM	DMSO	DTXSID7021815	95-76-1	3,4-Dichloroaniline
BF00173508	EPA_MIXTURE_010	21	mM	20	mM	DMSO	DTXSID0025523	118-71-8	Maltol
BF00173508	EPA_MIXTURE_010	20	mM	20	mM	DMSO	DTXSID4022529	99-76-3	Methylparaben
BF00173508	EPA_MIXTURE_010	20	mM	20	mM	DMSO	DTXSID4022442	77-40-7	Bisphenol B
BF00173508	EPA_MIXTURE_010	20	mM	20	mM	DMSO	DTXSID8022406	131-56-6	2,4-Dihydroxybenzophenone
BF00173508	EPA_MIXTURE_010	20	mM	20	mM	DMSO	DTXSID8042187	109-46-6	N,N'-Dibutylthiourea
BF00173508	EPA_MIXTURE_010	20	mM	20	mM	DMSO	DTXSID2021602	57-10-3	Hexadecanoic acid
BF00173508	EPA_MIXTURE_010	20	mM	20	mM	DMSO	DTXSID5035616	824-39-5	Sodium 2-nitrophenolate
BF00173508	EPA_MIXTURE_010	20	mM	20	mM	DMSO	DTXSID8021804	94-09-7	Benzocaine
BF00173508	EPA_MIXTURE_010	20	mM	20	mM	DMSO	DTXSID1022421	73-31-4	Melatonin
BF00173508	EPA_MIXTURE_010	20	mM	20	mM	DMSO	DTXSID8024109	66332-96-5	Flutolanil
BF00173508	EPA_MIXTURE_010	20	mM	20	mM	DMSO	DTXSID6045400	7681-76-7	Ronidazole
BF00173508	EPA_MIXTURE_010	20	mM	20	mM	DMSO	DTXSID0026967	120-55-8	Diethylene glycol dibenzoate
BF00173508	EPA_MIXTURE_010	20	mM	20	mM	DMSO	DTXSID5022510	1570-64-5	4-Chloro-2-methylphenol
BF00173508	EPA_MIXTURE_010	20	mM	20	mM	DMSO	DTXSID1041421	487-06-9	5,7-Dimethoxy-2H-chromen-2-one
BF00173508	EPA_MIXTURE_010	21	mM	20	mM	DMSO	DTXSID0042167	877-24-7	Monopotassium phthalate
BF00173508	EPA_MIXTURE_010	20	mM	20	mM	DMSO	DTXSID1041639	827-21-4	Sodium m-xylene-4-sulfonate
BF00173508	EPA_MIXTURE_010	20	mM	20	mM	DMSO	DTXSID6025272	87-25-2	Ethyl anthranilate
BF00173508	EPA_MIXTURE_010	20	mM	20	mM	DMSO	DTXSID6023862	1646-88-4	Aldoxycarb
BF00173508	EPA_MIXTURE_010	20	mM	20	mM	DMSO	DTXSID5021968	121-32-4	3-Ethoxy-4-hydroxybenzaldehyde
BF00173508	EPA_MIXTURE_010	20	mM	20	mM	DMSO	DTXSID9020295	106-47-8	4-Chloroaniline
BF00173508	EPA_MIXTURE_010	20	mM	20	mM	DMSO	DTXSID1034634	68157-60-8	Forchlorfenuron
BF00173508	EPA_MIXTURE_010	20	mM	20	mM	DMSO	DTXSID4027608	5915-41-3	Terbutylazine
BF00173508	EPA_MIXTURE_010	20	mM	20	mM	DMSO	DTXSID1032569	23103-98-2	Pirimicarb
BF00173508	EPA_MIXTURE_010	20	mM	20	mM	DMSO	DTXSID0020498	120-61-6	Dimethyl terephthalate
BF00173508	EPA_MIXTURE_010	20	mM	20	mM	DMSO	DTXSID7034961	111988-49-9	Thiacloprid
BF00173508	EPA_MIXTURE_010	20	mM	20	mM	DMSO	DTXSID0044571	618-45-1	3-Isopropylphenol
BF00173508	EPA_MIXTURE_010	20	mM	20	mM	DMSO	DTXSID1020439	120-83-2	2,4-Dichlorophenol
BF00173508	EPA_MIXTURE_010	20	mM	20	mM	DMSO	DTXSID3022455	131-11-3	Dimethyl phthalate
BF00173508	EPA_MIXTURE_010	20	mM	20	mM	DMSO	DTXSID3021196	139-40-2	Propazine
BF00173508	EPA_MIXTURE_010	20	mM	20	mM	DMSO	DTXSID9022312	1806-26-4	4-Octylphenol
BF00173508	EPA_MIXTURE_010	20	mM	20	mM	DMSO	DTXSID2021151	90-43-7	2-Phenylphenol
BF00173508	EPA_MIXTURE_010	20	mM	20	mM	DMSO	DTXSID4021717	59-50-7	4-Chloro-3-methylphenol
BF00173508	EPA_MIXTURE_010	20	mM	20	mM	DMSO	DTXSID0021969	121-33-5	4-Hydroxy-3-methoxybenzaldehyde
BF00173508	EPA_MIXTURE_010	20	mM	20	mM	DMSO	DTXSID8027454	2044-64-6	N,N-Dimethylacetoacetamide
BF00173508	EPA_MIXTURE_010	20	mM	20	mM	DMSO	DTXSID1022396	480-40-0	Chrysin
BF00173508	EPA_MIXTURE_010	8	mM	20	mM	DMSO	DTXSID9026132	83-67-0	Theobromine
BF00173508	EPA_MIXTURE_010	20	mM	20	mM	DMSO	DTXSID0038887	2321-07-5	Fluorescein
BF00173508	EPA_MIXTURE_010	20	mM	20	mM	DMSO	DTXSID2044391	88-69-7	2-Isopropylphenol
BF00173508	EPA_MIXTURE_010	20	mM	20	mM	DMSO	DTXSID0023296	61-73-4	Methylene blue
BF00173508	EPA_MIXTURE_010	20	mM	20	mM	DMSO	DTXSID7025003	583-78-8	2,5-Dichlorophenol
BF00173508	EPA_MIXTURE_010	20	mM	20	mM	DMSO	DTXSID7027540	3622-84-2	N-Butylbenzenesulfonamide
BF00173508	EPA_MIXTURE_010	20	mM	20	mM	DMSO	DTXSID7042356	2110-18-1	2-(3-Phenylpropyl)pyridine
BF00173508	EPA_MIXTURE_010	20	mM	20	mM	DMSO	DTXSID8022589	125-84-8	Aminoglutethimide
BF00173508	EPA_MIXTURE_010	8	mM	20	mM	DMSO	DTXSID0048185	41372-20-7	Apomorphine hydrochloride hydrate
BF00173508	EPA_MIXTURE_010	20	mM	20	mM	DMSO	DTXSID5041641	609-54-1	2,5-Dimethylbenzenesulfonic acid
BF00173508	EPA_MIXTURE_010	20	mM	20	mM	DMSO	DTXSID2027414	1563-38-8	2,3-Dihydro-2,2-dimethyl-7-benzofuranol
BF00173508	EPA_MIXTURE_010	20	mM	20	mM	DMSO	DTXSID7037551	101-42-8	Fenuron
BF00173508	EPA_MIXTURE_010	20	mM	20	mM	DMSO	DTXSID4024272	7287-19-6	Prometryn
BF00173508	EPA_MIXTURE_010	20	mM	20	mM	DMSO	DTXSID3034583	2122-70-5	Ethyl 1-naphthaleneacetate
BF00173508	EPA_MIXTURE_010	20	mM	20	mM	DMSO	DTXSID0048189	1166-52-5	Dodecyl gallate
BF00173508	EPA_MIXTURE_010	20	mM	20	mM	DMSO	DTXSID3026564	94-28-0	Triethylene glycol bis(2-ethylhexanoate)
BF00173508	EPA_MIXTURE_010	20	mM	20	mM	DMSO	DTXSID8020541	57-41-0	5,5-Diphenylhydantoin
BF00173508	EPA_MIXTURE_010	20	mM	20	mM	DMSO	DTXSID7032393	72490-01-8	Fenoxycarb
BF00173508	EPA_MIXTURE_010	20	mM	20	mM	DMSO	DTXSID1038321	3739-38-6	3-Phenoxybenzoic acid
BF00173508	EPA_MIXTURE_010	20	mM	20	mM	DMSO	DTXSID4022020	314-40-9	Bromacil
BF00173508	EPA_MIXTURE_010	20	mM	20	mM	DMSO	DTXSID0034192	10161-33-8	17beta-Trenbolone
BF00173508	EPA_MIXTURE_010	20	mM	20	mM	DMSO	DTXSID9041368	5394-36-5	5-Ethyl-5-methylhydantoin
BF00173508	EPA_MIXTURE_010	20	mM	20	mM	DMSO	DTXSID7024902	533-74-4	Dazomet
BF00173508	EPA_MIXTURE_010	20	mM	20	mM	DMSO	DTXSID3021485	121-91-5	1,3-Benzenedicarboxylic acid
BF00173508	EPA_MIXTURE_010	20	mM	20	mM	DMSO	DTXSID6021957	118-55-8	Phenyl salicylate
BF00173508	EPA_MIXTURE_010	20	mM	20	mM	DMSO	DTXSID5021336	58-55-9	Theophylline
BF00173508	EPA_MIXTURE_010	20	mM	20	mM	DMSO	DTXSID9022528	120-47-8	Ethylparaben
BF00173508	EPA_MIXTURE_010	20	mM	20	mM	DMSO	DTXSID7022043	499-83-2	2,6-Pyridinedicarboxylic acid
BF00173508	EPA_MIXTURE_010	20	mM	20	mM	DMSO	DTXSID3027320	824-78-2	Sodium 4-nitrophenolate
BF00173508	EPA_MIXTURE_010	20	mM	20	mM	DMSO	DTXSID9022310	486-66-8	Daidzein
BF00173508	EPA_MIXTURE_010	20	mM	20	mM	DMSO	DTXSID7029320	21245-02-3	2-Ethylhexyl 4-(dimethylamino)benzoate
BF00173508	EPA_MIXTURE_010	20	mM	20	mM	DMSO	DTXSID5027770	15214-89-8	2-Acrylamido-2-methyl-1-propanesulfonic acid
BF00173508	EPA_MIXTURE_010	20	mM	20	mM	DMSO	DTXSID4020959	99-55-8	2-Methyl-5-nitroaniline
BF00173508	EPA_MIXTURE_010	20	mM	20	mM	DMSO	DTXSID4044901	2694-54-4	Triallyl trimellitate
BF00173508	EPA_MIXTURE_010	20	mM	20	mM	DMSO	DTXSID9022360	140-66-9	4-(1,1,3,3-Tetramethylbutyl)phenol
BF00173508	EPA_MIXTURE_010	20	mM	20	mM	DMSO	DTXSID2020212	2409-55-4	2-tert-Butyl-4-methylphenol
BF00173508	EPA_MIXTURE_010	20	mM	20	mM	DMSO	DTXSID1025726	88-74-4	2-Nitroaniline
BF00173508	EPA_MIXTURE_010	20	mM	20	mM	DMSO	DTXSID7026285	120-14-9	Veratraldehyde
BF00173508	EPA_MIXTURE_010	21	mM	20	mM	DMSO	DTXSID0020286	95-74-9	3-Chloro-4-methylaniline
BF00173508	EPA_MIXTURE_010	20	mM	20	mM	DMSO	DTXSID7034674	125225-28-7	Ipconazole
BF00173508	EPA_MIXTURE_010	20	mM	20	mM	DMSO	DTXSID0034300	135410-20-7	Acetamiprid
BF00173508	EPA_MIXTURE_010	20	mM	20	mM	DMSO	DTXSID4047882	17696-62-7	Phenylparaben
BF00173508	EPA_MIXTURE_010	20	mM	20	mM	DMSO	DTXSID1023990	21725-46-2	Cyanazine
BF00173508	EPA_MIXTURE_010	20	mM	20	mM	DMSO	DTXSID7030307	626-43-7	3,5-Dichloroaniline
BF00173508	EPA_MIXTURE_010	20	mM	20	mM	DMSO	DTXSID3020209	94-26-8	Butylparaben
BF00173508	EPA_MIXTURE_010	20	mM	20	mM	DMSO	DTXSID5020443	94-80-4	2,4-D 1-butyl ester
BF00173508	EPA_MIXTURE_010	20	mM	20	mM	DMSO	DTXSID1032359	121552-61-2	Cyprodinil
BF00173508	EPA_MIXTURE_010	20	mM	20	mM	DMSO	DTXSID3047263	349495-42-7	PharmaGSID_47263
BF00173508	EPA_MIXTURE_010	20	mM	20	mM	DMSO	DTXSID3026647	99-96-7	4-Hydroxybenzoic acid
BF00173508	EPA_MIXTURE_010	20	mM	20	mM	DMSO	DTXSID9032535	95266-40-3	Trinexapac-ethyl
BF00173508	EPA_MIXTURE_010	20	mM	20	mM	DMSO	DTXSID2040731	605-45-8	Diisopropyl phthalate
BF00173508	EPA_MIXTURE_010	20	mM	20	mM	DMSO	DTXSID2022048	525-82-6	Flavone
BF00173508	EPA_MIXTURE_010	20	mM	20	mM	DMSO	DTXSID8027402	1459-93-4	Dimethyl isophthalate
BF00173508	EPA_MIXTURE_010	20	mM	20	mM	DMSO	DTXSID6044430	451-40-1	1,2-Diphenylethanone
BF00173508	EPA_MIXTURE_010	20	mM	20	mM	DMSO	DTXSID6022341	1610-18-0	Prometon
BF00173508	EPA_MIXTURE_010	20	mM	20	mM	DMSO	DTXSID6026080	100-21-0	Terephthalic acid
BF00173508	EPA_MIXTURE_010	20	mM	20	mM	DMSO	DTXSID1024338	23564-05-8	Thiophanate-methyl
BF00173508	EPA_MIXTURE_010	20	mM	20	mM	DMSO	DTXSID1022265	15972-60-8	Alachlor
BF00173508	EPA_MIXTURE_010	20	mM	20	mM	DMSO	DTXSID9027863	25322-69-4	Polypropylene glycol
BF00173508	EPA_MIXTURE_010	20	mM	20	mM	DMSO	DTXSID3047261	177785-47-6	PharmaGSID_47261
BF00173508	EPA_MIXTURE_010	20	mM	20	mM	DMSO	DTXSID0034223	119168-77-3	Tebufenpyrad
BF00173508	EPA_MIXTURE_010	20	mM	20	mM	DMSO	DTXSID1047312	864283-48-7	GSK232420A
BF00173508	EPA_MIXTURE_010	20	mM	20	mM	DMSO	DTXSID5023742	81-81-2	Warfarin
BF00173508	EPA_MIXTURE_010	20	mM	20	mM	DMSO	DTXSID9032610	80844-07-1	Etofenprox
BF00173508	EPA_MIXTURE_010	20	mM	20	mM	DMSO	DTXSID5021386	88-06-2	2,4,6-Trichlorophenol
BF00173508	EPA_MIXTURE_010	20	mM	20	mM	DMSO	DTXSID9022522	84-69-5	Diisobutyl phthalate
BF00173508	EPA_MIXTURE_010	20	mM	20	mM	DMSO	DTXSID4020371	80-08-0	Dapsone
BF00173508	EPA_MIXTURE_010	20	mM	20	mM	DMSO	DTXSID4032459	298-02-2	Phorate
BF00173508	EPA_MIXTURE_010	20	mM	20	mM	DMSO	DTXSID4024359	95-95-4	2,4,5-Trichlorophenol
BF00173508	EPA_MIXTURE_010	20	mM	20	mM	DMSO	DTXSID2041389	93-08-3	2'-Acetonaphthone
BF00173508	EPA_MIXTURE_010	20	mM	20	mM	DMSO	DTXSID1021031	156-10-5	4-Nitrosodiphenylamine
BF00173508	EPA_MIXTURE_010	20	mM	20	mM	DMSO	DTXSID5020863	41372-08-1	Methyldopa sesquihydrate
BF00173508	EPA_MIXTURE_010	20	mM	20	mM	DMSO	DTXSID7020766	122-42-9	Propham
BF00173508	EPA_MIXTURE_010	20	mM	20	mM	DMSO	DTXSID7040788	121-00-6	2-tert-Butyl-4-methoxyphenol
BF00173508	EPA_MIXTURE_010	20	mM	20	mM	DMSO	DTXSID0020288	3165-93-3	4-Chloro-2-methylaniline hydrochloride
BF00173508	EPA_MIXTURE_010	20	mM	20	mM	DMSO	DTXSID9037741	134-84-9	4-Methylbenzophenone
BF00173508	EPA_MIXTURE_010	20	mM	20	mM	DMSO	DTXSID2025632	89-62-3	4-Methyl-2-nitroaniline
BF00173508	EPA_MIXTURE_010	20	mM	20	mM	DMSO	DTXSID3020918	93-46-9	N,N'-Di-2-naphthyl-p-phenylenediamine
BF00173508	EPA_MIXTURE_010	20	mM	20	mM	DMSO	DTXSID8026068	72-14-0	Sulfathiazole
BF00173508	EPA_MIXTURE_010	20	mM	20	mM	DMSO	DTXSID2022121	791-28-6	Triphenylphosphine oxide
BF00173508	EPA_MIXTURE_010	20	mM	20	mM	DMSO	DTXSID1044489	5810-11-7	2-Chloro-N,N-dimethyl-3-oxobutanamide
BF00173508	EPA_MIXTURE_010	20	mM	20	mM	DMSO	DTXSID7040287	1982-47-4	Chloroxuron
BF00173508	EPA_MIXTURE_010	20	mM	20	mM	DMSO	DTXSID9027443	1852-16-0	N-(Butoxymethyl)acrylamide
BF00173508	EPA_MIXTURE_010	12	mM	20	mM	DMSO	DTXSID6024674	112-56-1	2-(2-Butoxyethoxy)ethyl thiocyanate
BF00173508	EPA_MIXTURE_010	20	mM	20	mM	DMSO	DTXSID5021835	100-10-7	4-Dimethylaminobenzaldehyde
BF00173508	EPA_MIXTURE_010	20	mM	20	mM	DMSO	DTXSID5029136	101-11-1	3-((Ethylphenylamino)methyl)benzenesulfonic acid
BF00173508	EPA_MIXTURE_010	20	mM	20	mM	DMSO	DTXSID8020965	94-52-0	6-Nitrobenzimidazole
BF00173508	EPA_MIXTURE_010	20	mM	20	mM	DMSO	DTXSID6041761	123-03-5	Cetylpyridinium chloride
BF00173508	EPA_MIXTURE_010	20	mM	20	mM	DMSO	DTXSID4047173	867-81-2	Sodium pantothenate
BF00173508	EPA_MIXTURE_010	20	mM	20	mM	DMSO	DTXSID5026209	933-75-5	2,3,6-Trichlorophenol
BF00173508	EPA_MIXTURE_010	20	mM	20	mM	DMSO	DTXSID3030428	67-47-0	5-(Hydroxymethyl)-2-furfural
BF00173508	EPA_MIXTURE_010	21	mM	20	mM	DMSO	DTXSID3047716	765-70-8	3-Methyl-1,2-cyclopentanedione
BF00173508	EPA_MIXTURE_010	20	mM	20	mM	DMSO	DTXSID8022082	614-80-2	2-Acetamidophenol
BF00173508	EPA_MIXTURE_010	20	mM	20	mM	DMSO	DTXSID8027294	689-11-2	sec-Butylurea
BF00173508	EPA_MIXTURE_010	20	mM	20	mM	DMSO	DTXSID1021116	62-44-2	Phenacetin
BF00173508	EPA_MIXTURE_010	20	mM	20	mM	DMSO	DTXSID1020142	91-76-9	6-Phenyl-1,3,5-triazine-2,4-diamine
BF00173508	EPA_MIXTURE_010	20	mM	20	mM	DMSO	DTXSID5023114	93-14-1	Guaifenesin
BF00173508	EPA_MIXTURE_010	20	mM	20	mM	DMSO	DTXSID6026955	118-48-9	2H-3,1-Benzoxazine-2,4(1H)-dione
BF00173508	EPA_MIXTURE_010	20	mM	20	mM	DMSO	DTXSID7044893	25354-97-6	2-Hexyldecanoic acid
BF00173508	EPA_MIXTURE_010	20	mM	20	mM	DMSO	DTXSID0042080	18854-01-8	Isoxathion
BF00173508	EPA_MIXTURE_010	20	mM	20	mM	DMSO	DTXSID8042137	28730-17-8	Methfuroxam
BF00173508	EPA_MIXTURE_010	20	mM	20	mM	DMSO	DTXSID2044848	16669-59-3	N-(Isobutoxymethyl)acrylamide
BF00173508	EPA_MIXTURE_010	19	mM	20	mM	DMSO	DTXSID5026120	54827-17-7	3,3',5,5'-Tetramethylbenzidine
BF00173508	EPA_MIXTURE_010	20	mM	20	mM	DMSO	DTXSID5047087	606-45-1	Methyl 2-methoxybenzoate
BF00173508	EPA_MIXTURE_010	20	mM	20	mM	DMSO	DTXSID1021118	136-40-3	Phenazopyridine hydrochloride
BF00173508	EPA_MIXTURE_010	20	mM	20	mM	DMSO	DTXSID2024452	2016-88-8	Amiloride hydrochloride
BF00173508	EPA_MIXTURE_010	20	mM	20	mM	DMSO	DTXSID5041439	84-54-8	2-Methylanthraquinone
BF00173508	EPA_MIXTURE_010	20	mM	20	mM	DMSO	DTXSID4042468	39196-18-4	Thiofanox
BF00173508	EPA_MIXTURE_010	20	mM	20	mM	DMSO	DTXSID0024761	108-42-9	3-Chloroaniline
BF00173508	EPA_MIXTURE_010	20	mM	20	mM	DMSO	DTXSID8024573	51-17-2	Benzimidazole
BF00173508	EPA_MIXTURE_010	20	mM	20	mM	DMSO	DTXSID0041359	133-53-9	2,4-Dichloro-3,5-dimethylphenol
BF00173508	EPA_MIXTURE_010	20	mM	20	mM	DMSO	DTXSID7038814	2835-68-9	4-Aminobenzamide
BF00173508	EPA_MIXTURE_010	20	mM	20	mM	DMSO	DTXSID6021296	27470-51-5	Suxibuzone
BF00173508	EPA_MIXTURE_010	20	mM	20	mM	DMSO	DTXSID1041502	497-39-2	4,6-Di-tert-butyl-m-cresol
BF00173508	EPA_MIXTURE_010	20	mM	20	mM	DMSO	DTXSID7021362	88-19-7	o-Toluenesulfonamide
BF00173508	EPA_MIXTURE_010	20	mM	20	mM	DMSO	DTXSID1024465	934-32-7	2-Aminobenzimidazole
BF00173508	EPA_MIXTURE_010	20	mM	20	mM	DMSO	DTXSID9032375	109293-98-3	Diflufenzopyr-sodium
BF00173508	EPA_MIXTURE_010	20	mM	20	mM	DMSO	DTXSID5022857	53-06-5	Cortisone
BF00173508	EPA_MIXTURE_010	20	mM	20	mM	DMSO	DTXSID7040152	497-76-7	Arbutin
BF00173508	EPA_MIXTURE_010	20	mM	20	mM	DMSO	DTXSID9044534	13031-43-1	4-Acetylphenyl acetate
BF00173508	EPA_MIXTURE_010	20	mM	20	mM	DMSO	DTXSID8022084	616-86-4	4-Ethoxy-2-nitroaniline
BF00173508	EPA_MIXTURE_010	20	mM	20	mM	DMSO	DTXSID6044690	54914-85-1	1,1'-[Ethane-1,2-diylbis(oxy)]bis(3-methylbenzene)
BF00173508	EPA_MIXTURE_010	20	mM	20	mM	DMSO	DTXSID7023194	134678-17-4	Lamivudine
BF00173508	EPA_MIXTURE_010	20	mM	20	mM	DMSO	DTXSID5031133	131-16-8	Dipropyl phthalate
BF00173508	EPA_MIXTURE_010	20	mM	20	mM	DMSO	DTXSID7047435	426-13-1	Fluorometholone
BF00173508	EPA_MIXTURE_010	20	mM	20	mM	DMSO	DTXSID0041220	1469-48-3	cis-1,2,3,6-Tetrahydrophthalimide
BF00173508	EPA_MIXTURE_010	20	mM	20	mM	DMSO	DTXSID0045254	64-85-7	21-Hydroxyprogesterone
BF00173508	EPA_MIXTURE_010	20	mM	20	mM	DMSO	DTXSID1038876	132-54-7	Phenyl 1-hydroxy-2-naphthoate
BF00173508	EPA_MIXTURE_010	20	mM	20	mM	DMSO	DTXSID7021603	10030-73-6	(E)-Hexadec-9-enoic acid
BF00173508	EPA_MIXTURE_010	20	mM	20	mM	DMSO	DTXSID8041327	89-00-9	2,3-Pyridinedicarboxylic acid
BF00173508	EPA_MIXTURE_010	20	mM	20	mM	DMSO	DTXSID4044747	94317-64-3	N-Butylphosphorothioic triamide
BF00173508	EPA_MIXTURE_010	20	mM	20	mM	DMSO	DTXSID7025138	138-89-6	N,N-Dimethyl-4-nitrosoaniline
BF00173508	EPA_MIXTURE_010	20	mM	20	mM	DMSO	DTXSID6020222	592-31-4	N-Butylurea
BF00173508	EPA_MIXTURE_010	21	mM	20	mM	DMSO	DTXSID6021404	2489-77-2	1,1,3-Trimethyl-2-thiourea
BF00173508	EPA_MIXTURE_010	20	mM	20	mM	DMSO	DTXSID4027579	4792-15-8	Pentaethylene glycol
BF00173508	EPA_MIXTURE_010	19	mM	20	mM	DMSO	DTXSID7025421	495-18-1	N-Hydroxybenzamide
BF00173508	EPA_MIXTURE_010	20	mM	20	mM	DMSO	DTXSID7020007	968-81-0	Acetohexamide
BF00173508	EPA_MIXTURE_010	20	mM	20	mM	DMSO	DTXSID1031626	1896-62-4	Methyl trans-styryl ketone
BF00173508	EPA_MIXTURE_010	20	mM	20	mM	DMSO	DTXSID7023300	83-43-2	Methylprednisolone
BF00173508	EPA_MIXTURE_010	20	mM	20	mM	DMSO	DTXSID9021184	50-24-8	Prednisolone
BF00173508	EPA_MIXTURE_010	20	mM	20	mM	DMSO	DTXSID2040787	139-07-1	Benzyldimethyldodecylammonium chloride
BF00173508	EPA_MIXTURE_010	20	mM	20	mM	DMSO	DTXSID2044507	10347-81-6	Maprotiline hydrochloride
BF00173508	EPA_MIXTURE_010	20	mM	20	mM	DMSO	DTXSID6021290	57-68-1	Sulfamethazine
BF00173508	EPA_MIXTURE_010	20	mM	20	mM	DMSO	DTXSID7031531	129-73-7	Leucomalachite green
BF00173508	EPA_MIXTURE_010	20	mM	20	mM	DMSO	DTXSID3023974	98-57-7	4-Chlorophenyl methyl sulfone
BF00173508	EPA_MIXTURE_010	20	mM	20	mM	DMSO	DTXSID0047589	27593-23-3	6-Pentyl-2H-pyran-2-one
BF00173508	EPA_MIXTURE_010	20	mM	20	mM	DMSO	DTXSID5044869	2057-49-0	4-(3-Phenylpropyl)pyridine
BF00173508	EPA_MIXTURE_010	20	mM	20	mM	DMSO	DTXSID4047094	94-02-0	Ethyl benzoylacetate
BF00173508	EPA_MIXTURE_010	20	mM	20	mM	DMSO	DTXSID1027344	947-04-6	Azacyclotridecan-2-one
BF00173508	EPA_MIXTURE_010	20	mM	20	mM	DMSO	DTXSID3020912	389-08-2	Nalidixic acid
BF00173508	EPA_MIXTURE_010	20	mM	20	mM	DMSO	DTXSID0047161	55418-52-5	Piperonyl acetone
BF00173508	EPA_MIXTURE_010	20	mM	20	mM	DMSO	DTXSID1038822	4196-89-8	Neopentyl glycol dibenzoate
BF00173508	EPA_MIXTURE_010	20	mM	20	mM	DMSO	DTXSID9021134	103-85-5	1-Phenyl-2-thiourea
BF00173508	EPA_MIXTURE_010	20	mM	20	mM	DMSO	DTXSID1044851	16969-10-1	2-Hydroxy-3-phenoxypropyl prop-2-enoate
BF00173508	EPA_MIXTURE_010	20	mM	20	mM	DMSO	DTXSID5044495	5471-51-2	4-(4-Hydroxyphenyl)butan-2-one
BF00173508	EPA_MIXTURE_010	20	mM	20	mM	DMSO	DTXSID7022598	14028-44-5	Amoxapine
BF00173508	EPA_MIXTURE_010	20	mM	20	mM	DMSO	DTXSID7023510	125-33-7	Primidone
BF00173508	EPA_MIXTURE_010	20	mM	20	mM	DMSO	DTXSID4044587	148-87-8	3-[Ethyl(phenyl)amino]propanenitrile
BF00173508	EPA_MIXTURE_010	20	mM	20	mM	DMSO	DTXSID8029282	6807-17-6	4,4'-(4-Methylpentane-2,2-diyl)diphenol
BF00173508	EPA_MIXTURE_010	20	mM	20	mM	DMSO	DTXSID1021617	99-04-7	3-Methylbenzoic acid
BF00173508	EPA_MIXTURE_010	20	mM	20	mM	DMSO	DTXSID9040718	6358-64-1	2,5-Dimethoxy-4-chloroaniline
BF00173508	EPA_MIXTURE_010	20	mM	20	mM	DMSO	DTXSID3047504	26921-17-5	Timolol maleate salt
BF00173508	EPA_MIXTURE_010	20	mM	20	mM	DMSO	DTXSID7020344	88107-10-2	Tomelukast
BF00173508	EPA_MIXTURE_010	20	mM	20	mM	DMSO	DTXSID7042140	21540-35-2	Methiuron
BF00173508	EPA_MIXTURE_010	20	mM	20	mM	DMSO	DTXSID8038801	2312-73-4	N-Benzyl-9-(tetrahydro-2H-pyran-2-yl)adenine
BF00173508	EPA_MIXTURE_010	20	mM	20	mM	DMSO	DTXSID5028114	63133-74-4	2-(Ethyl(3-methylphenyl)amino)acetonitrile
BF00173508	EPA_MIXTURE_010	20	mM	20	mM	DMSO	DTXSID9020451	1212-29-9	N,N'-Dicyclohexylthiourea
BF00173508	EPA_MIXTURE_010	20	mM	20	mM	DMSO	DTXSID7020760	3778-73-2	Ifosfamide
BF00173508	EPA_MIXTURE_010	20	mM	20	mM	DMSO	DTXSID3024318	886-50-0	Terbutryn
BF00173508	EPA_MIXTURE_010	20	mM	20	mM	DMSO	DTXSID1042441	1918-11-2	Terbucarb
BF00173508	EPA_MIXTURE_010	20	mM	20	mM	DMSO	DTXSID3044962	599-61-1	3,3'-Sulphonyldianiline
BF00173508	EPA_MIXTURE_010	20	mM	20	mM	DMSO	DTXSID4041995	3878-19-1	Fuberidazole
BF00173508	EPA_MIXTURE_010	20	mM	20	mM	DMSO	DTXSID1020433	612-83-9	3,3'-Dichlorobenzidine dihydrochloride
BF00173508	EPA_MIXTURE_010	20	mM	20	mM	DMSO	DTXSID8020830	298-81-7	8-Methoxypsoralen
BF00173508	EPA_MIXTURE_010	20	mM	20	mM	DMSO	DTXSID1025560	484-20-8	5-Methoxypsoralen
BF00173508	EPA_MIXTURE_010	20	mM	20	mM	DMSO	DTXSID5044607	17696-61-6	sec-Butylparaben
BF00173508	EPA_MIXTURE_010	20	mM	20	mM	DMSO	DTXSID7044895	25804-49-3	tert-Butyl 4-hydroxybenzoate
BF00173508	EPA_MIXTURE_010	20	mM	20	mM	DMSO	DTXSID4020248	86-74-8	Carbazole
BF00173508	EPA_MIXTURE_010	20	mM	20	mM	DMSO	DTXSID2044890	2467-03-0	2-(4-Hydroxybenzyl)phenol
BF00173508	EPA_MIXTURE_010	20	mM	20	mM	DMSO	DTXSID3044627	2592-95-2	1H-Benzotriazol-1-ol
BF00173508	EPA_MIXTURE_010	20	mM	20	mM	DMSO	DTXSID8021305	37076-68-9	Tegafur
BF00173508	EPA_MIXTURE_010	20	mM	20	mM	DMSO	DTXSID4035209	2465-59-0	Oxypurinol
BF00173508	EPA_MIXTURE_010	20	mM	20	mM	DMSO	DTXSID0027981	33509-43-2	4-Amino-6-tert-butyl-3-thioxo-3,4-dihydro-1,2,4-triazin-5(2H)-one
BF00173508	EPA_MIXTURE_010	20	mM	20	mM	DMSO	DTXSID7020631	324-93-6	4'-Fluoro-4-aminodiphenyl
BF00173508	EPA_MIXTURE_010	20	mM	20	mM	DMSO	DTXSID7047568	41394-05-2	Metamitron
BF00173508	EPA_MIXTURE_010	20	mM	20	mM	DMSO	DTXSID8044915	32329-20-7	3-Methyl-3,4-dihydro-2H-1,4-benzoxazine
BF00173508	EPA_MIXTURE_010	20	mM	20	mM	DMSO	DTXSID4044585	14663-23-1	Dantrolene sodium
BF00173508	EPA_MIXTURE_010	20	mM	20	mM	DMSO	DTXSID2023775	630-93-3	Diphenylhydantoin sodium
BF00173508	EPA_MIXTURE_010	20	mM	20	mM	DMSO	DTXSID8044830	7473-98-5	2-Hydroxy-2-methylpropiophenone
BF00173508	EPA_MIXTURE_010	20	mM	20	mM	DMSO	DTXSID8030423	6051-87-2	5,6-Benzoflavone
BF00173508	EPA_MIXTURE_010	20	mM	20	mM	DMSO	DTXSID8041452	87-26-3	2-(1-Methylbutyl)phenol
BF00173508	EPA_MIXTURE_010	20	mM	20	mM	DMSO	DTXSID4021131	135-88-6	N-Phenyl-2-naphthylamine
BF00173508	EPA_MIXTURE_010	20	mM	20	mM	DMSO	DTXSID7041883	1420-07-1	Dinoterb
BF00173508	EPA_MIXTURE_010	20	mM	20	mM	DMSO	DTXSID1030319	132-32-1	3-Amino-9-ethylcarbazole
BF00173508	EPA_MIXTURE_010	20	mM	20	mM	DMSO	DTXSID2047569	2443-58-5	2-Hydroxyfluorene
BF00173508	EPA_MIXTURE_010	20	mM	20	mM	DMSO	DTXSID1044982	70693-59-3	2-Amino-N-cyclohexyl-N-methylbenzenesulfonamide
BF00173508	EPA_MIXTURE_010	20	mM	20	mM	DMSO	DTXSID3020960	602-87-9	5-Nitroacenaphthene
BF00173508	EPA_MIXTURE_010	20	mM	20	mM	DMSO	DTXSID2041547	89-68-9	6-Chlorothymol
BF00173508	EPA_MIXTURE_010	20	mM	20	mM	DMSO	DTXSID0025812	500-66-3	Olivetol
BF00173508	EPA_MIXTURE_010	20	mM	20	mM	DMSO	DTXSID4042256	17781-31-6	Parinol
BF00173508	EPA_MIXTURE_010	20	mM	20	mM	DMSO	DTXSID8040723	22978-25-2	2-Chloro-5-nitro-N-phenylbenzamide
BF00173508	EPA_MIXTURE_010	20	mM	20	mM	DMSO	DTXSID7021784	87-17-2	Salicylanilide
BF00173508	EPA_MIXTURE_010	20	mM	20	mM	DMSO	DTXSID0041197	373-49-9	(Z)-Hexadec-9-enoic acid
BF00173508	EPA_MIXTURE_010	20	mM	20	mM	DMSO	DTXSID8044595	1577-03-3	1-(4-Chlorophenyl)-4,4-dimethylpent-1-en-3-one
BF00173508	EPA_MIXTURE_010	20	mM	20	mM	DMSO	DTXSID0044440	5510-99-6	2,6-Di(butan-2-yl)phenol
BF00173508	EPA_MIXTURE_010	20	mM	20	mM	DMSO	DTXSID5047031	620-40-6	Tribenzylamine
BF00173508	EPA_MIXTURE_010	20	mM	20	mM	DMSO	DTXSID3042477	2398-96-1	Tolnaftate
BF00173508	EPA_MIXTURE_010	20	mM	20	mM	DMSO	DTXSID5020732	15687-27-1	Ibuprofen
BF00173508	EPA_MIXTURE_010	20	mM	20	mM	DMSO	DTXSID9047126	7335-26-4	Ethyl 2-methoxybenzoate
BF00173508	EPA_MIXTURE_010	20	mM	20	mM	DMSO	DTXSID9033187	549-18-8	Amitriptyline hydrochloride
BF00173508	EPA_MIXTURE_010	20	mM	20	mM	DMSO	DTXSID3047477	6533-00-2	dl-Norgestrel
BF00173508	EPA_MIXTURE_010	20	mM	20	mM	DMSO	DTXSID8047428	67028-40-4	(4-Methylphenoxy) acetic acid ethyl ester
BF00173508	EPA_MIXTURE_010	20	mM	20	mM	DMSO	DTXSID5024687	98-29-3	4-tert-Butylcatechol
BF00173508	EPA_MIXTURE_010	20	mM	20	mM	DMSO	DTXSID9021344	139-65-1	4,4'-Thiodianiline
BF00173508	EPA_MIXTURE_010	20	mM	20	mM	DMSO	DTXSID3044598	16485-10-2	Panthenol
BF00173508	EPA_MIXTURE_010	20	mM	20	mM	DMSO	DTXSID7026526	88-44-8	2-Amino-5-methylbenzenesulfonic acid
BF00173508	EPA_MIXTURE_010	19	mM	20	mM	DMSO	DTXSID1029889	989-51-5	(-)-Epigallocatechin gallate
BF00173508	EPA_MIXTURE_010	20	mM	20	mM	DMSO	DTXSID8032623	133-32-4	Indole-3-butyric acid
BF00173508	EPA_MIXTURE_010	20	mM	20	mM	DMSO	DTXSID5023324	78415-72-2	Milrinone
BF00173508	EPA_MIXTURE_010	20	mM	20	mM	DMSO	DTXSID0044868	2050-43-3	N-(2,4-Dimethylphenyl)acetamide
BF00173508	EPA_MIXTURE_010	20	mM	20	mM	DMSO	DTXSID9047201	20665-85-4	Vanillin isobutyrate
BF00173508	EPA_MIXTURE_010	20	mM	20	mM	DMSO	DTXSID0044365	1118-12-3	(1,1-Dimethylethyl)urea
BF00173508	EPA_MIXTURE_010	20	mM	20	mM	DMSO	DTXSID7044922	3445-11-2	1-(2-Hydroxyethyl)pyrrolidin-2-one
BF00173508	EPA_MIXTURE_010	20	mM	20	mM	DMSO	DTXSID0020577	536-33-4	Ethionamide
BF00173508	EPA_MIXTURE_010	20	mM	20	mM	DMSO	DTXSID3026560	92-70-6	3-Hydroxy-2-naphthoic acid
BF00173508	EPA_MIXTURE_010	20	mM	20	mM	DMSO	DTXSID1021322	97-77-8	Disulfiram
BF00173508	EPA_MIXTURE_010	20	mM	20	mM	DMSO	DTXSID2021781	84-74-2	Dibutyl phthalate
BF00173508	EPA_MIXTURE_010	4	mM	20	mM	DMSO	DTXSID1042360	53558-25-1	Pyrinuron
BF00173508	EPA_MIXTURE_010	20	mM	20	mM	DMSO	DTXSID1047150	33693-84-4	tert-Butyl hydrogen phthalate
BF00173508	EPA_MIXTURE_010	20	mM	20	mM	DMSO	DTXSID3037545	29973-13-5	Ethiofencarb
BF00173508	EPA_MIXTURE_010	20	mM	20	mM	DMSO	DTXSID5044738	89-33-8	Ethyl 5-oxo-1-phenyl-4,5-dihydro-1H-pyrazole-3-carboxylate
BF00173508	EPA_MIXTURE_010	20	mM	20	mM	DMSO	DTXSID8037594	26259-45-0	Secbumeton
BF00173508	EPA_MIXTURE_010	20	mM	20	mM	DMSO	DTXSID4047543	57646-30-7	Furalaxyl
BF00173508	EPA_MIXTURE_010	20	mM	20	mM	DMSO	DTXSID0041698	34681-23-7	Butoxycarboxim
BF00173508	EPA_MIXTURE_010	20	mM	20	mM	DMSO	DTXSID2044715	68298-46-4	2,2-Dimethyl-2,3-dihydro-1-benzofuran-7-amine
BF00173508	EPA_MIXTURE_010	20	mM	20	mM	DMSO	DTXSID9044407	19406-86-1	3-Amino-4-methylbenzamide
BF00173508	EPA_MIXTURE_010	20	mM	20	mM	DMSO	DTXSID0044523	118-88-7	5-Amino-2-methylbenzenesulfonic acid
BF00173508	EPA_MIXTURE_010	20	mM	20	mM	DMSO	DTXSID0040705	132-60-5	Cinchophen
BF00173508	EPA_MIXTURE_010	20	mM	20	mM	DMSO	DTXSID9026261	13674-87-8	Tris(1,3-dichloro-2-propyl) phosphate
BF00173508	EPA_MIXTURE_010	20	mM	20	mM	DMSO	DTXSID0037576	1746-81-2	Monolinuron
BF00173508	EPA_MIXTURE_010	20	mM	20	mM	DMSO	DTXSID8041373	42482-06-4	2-Octen-1-ylsuccinic anhydride
BF00173508	EPA_MIXTURE_010	20	mM	20	mM	DMSO	DTXSID4042252	7152-80-9	4-(Dimethylamino)phenylthiocyanate
BF00173508	EPA_MIXTURE_010	20	mM	20	mM	DMSO	DTXSID3044625	25209-66-9	N,N-Bis(2-hydroxyethyl)formamide
BF00173508	EPA_MIXTURE_010	20	mM	20	mM	DMSO	DTXSID1042285	947-02-4	Phosfolan
BF00173508	EPA_MIXTURE_010	20	mM	20	mM	DMSO	DTXSID8044591	1515-72-6	2-Butyl-1H-isoindole-1,3(2H)-dione
BF00173508	EPA_MIXTURE_010	13	mM	20	mM	DMSO	DTXSID1044439	5459-58-5	Butyl cyanoacetate
BF00173508	EPA_MIXTURE_010	16	mM	20	mM	DMSO	DTXSID4041529	121-61-9	4'-Sulfamylacetanilide
BF00173508	EPA_MIXTURE_010	14	mM	20	mM	DMSO	DTXSID3041615	4658-28-0	Aziprotryne
BF00173508	EPA_MIXTURE_010	14	mM	20	mM	DMSO	DTXSID7021780	84-66-2	Diethyl phthalate
BF00173508	EPA_MIXTURE_010	20	mM	20	mM	DMSO	DTXSID5044491	7491-74-9	Piracetam
BF00173508	EPA_MIXTURE_010	20	mM	20	mM	DMSO	DTXSID9020247	63-25-2	Carbaryl
BF00173508	EPA_MIXTURE_010	20	mM	20	mM	DMSO	DTXSID9020247	63-25-2	Carbaryl
BF00173508	EPA_MIXTURE_010	16	mM	20	mM	DMSO	DTXSID6044802	141-19-5	Bis(2-butoxyethyl) decanedioate
BF00173508	EPA_MIXTURE_010	17	mM	20	mM	DMSO	DTXSID1034844	32889-48-8	Procyazine
BF00173508	EPA_MIXTURE_010	14	mM	20	mM	DMSO	DTXSID7044502	102-40-9	2,2'-[Benzene-1,3-diylbis(oxy)]diethanol
BF00173508	EPA_MIXTURE_010	20	mM	20	mM	DMSO	DTXSID9037612	24017-47-8	Triazophos
BF00173508	EPA_MIXTURE_010	20	mM	20	mM	DMSO	DTXSID4022527	94-13-3	Propylparaben
BF00173508	EPA_MIXTURE_010	13	mM	20	mM	DMSO	DTXSID9044877	22987-10-6	N-(3-Aminophenyl)propanamide
BF00173508	EPA_MIXTURE_010	17	mM	20	mM	DMSO	DTXSID6041973	80-38-6	Fenson
BF00173508	EPA_MIXTURE_010	5	mM	20	mM	DMSO	DTXSID6037697	60397-77-5	N-(2,4-Dimethylphenyl)formamide
BF00173508	EPA_MIXTURE_010	15	mM	20	mM	DMSO	DTXSID9044584	14611-52-0	Selegiline hydrochloride
BF00173508	EPA_MIXTURE_010	4	mM	20	mM	DMSO	DTXSID5025021	84-61-7	Dicyclohexyl phthalate
BF00173508	EPA_MIXTURE_010	5	mM	20	mM	DMSO	DTXSID1044433	504-02-9	1,3-Cyclohexanedione
BF00173508	EPA_MIXTURE_010	17	mM	20	mM	DMSO	DTXSID0044995	86-20-4	9-Ethyl-3-nitro-9H-carbazole
BF00173508	EPA_MIXTURE_010	12	mM	20	mM	DMSO	DTXSID2042143	2876-78-0	Methyl 1-naphthaleneacetate
BF00173508	EPA_MIXTURE_010	4	mM	20	mM	DMSO	DTXSID0044947	5117-12-4	1-(Morpholin-4-yl)prop-2-en-1-one
BF00173508	EPA_MIXTURE_010	13	mM	20	mM	DMSO	DTXSID8037596	1014-70-6	Simetryn

## Sheet: LC gradient
Calculating the number of methanol and water molecules
input parameters
output parameters
	RT	A	B
Retention time (min)	6.168	52.992	47.008
This step accounts for the small amount of methanol added to A
and the amount of water added to B
	A	B	Final %
H2O	52.939	4.7008	57.6398
MeOH	0.52992	42.3072	42.8371
We also have to account for the difference in molecular volume
between H2O and MeOH
	McGowan V	Boiling point (oC)
H2O	0.1673	100
MeOH	0.3082	64.7
Ratio MeOH:H2O	1.8422	0.647
	H2O only	Mixture	Mix with V for MeOH	Final n
n of H2O molecules	1700	979.877	366.561	979.877
n of MeOH molecules	0	728.231	1341.55	256.948
Total	1700	1708.11	1708.11	1236.83
Gradient	t (min)	A	B
	0	90	10
	1	84	16
	2	78	22
	3	72	28
	4	66	34
	5	60	40
	6	54	46
	7	48	52
	8	42	58
	9	36	64
	10	30	70
	11	24	76
	12	18	82
	13	12	88
	14	6	94
	15	0	100
	16	0	100
	17	0	100
	18	0	100
	19	0	100
	20	0	100
