# Supplementary material for: Modeling the relative response factor of small molecules in positive electrospray ionization
Source: Royal Society of Chemistry journal article supplement (doi:10.1039/d4ra06695b), 2024-01-01
Supplement: d4ra06695b2.pdf [file d4ra06695b2.pdf]

## Supporting Information

1

2

3 **Modeling the ionization efficiency of small molecules in positive electrospray**

4 **ionization using molecular dynamics simulations**

5

6 Dimitri Abrahamsson<sup>1,2</sup>, Lelouda-Athanasia Koronaiou<sup>3,4</sup>, Trevor Johnson<sup>1</sup>, Junjie Yang<sup>2</sup>, Xiaowen Ji<sup>1</sup> and

7 Dimitra A. Lambropoulou<sup>3,4</sup>

8

9 <sup>1</sup> Department of Pediatrics, New York University Grossman School of Medicine, New York, New York

10 10016, United States

11 <sup>2</sup> Department of Obstetrics, Gynecology and Reproductive Sciences, School of Medicine, University of

12 California, San Francisco, California 94158, United States

13 <sup>3</sup> Laboratory of Environmental Pollution Control, Department of Chemistry, Aristotle University of

14 Thessaloniki, University Campus 54124 Thessaloniki, Greece

15 <sup>4</sup> Center for Interdisciplinary Research and Innovation (CIRI-AUTH), Balkan Center, Thessaloniki 57001,

16 Greece

17

18

19

20

21 Contents: Text S1-S2, Figures S1-S10 and Tables S1-S2

22 \*Corresponding author: Dimitri Abrahamsson, [dimitri.abrahamsson@gmail.com](mailto:dimitri.abrahamsson@gmail.com)

## 23 SUPPLEMENTARY TEXT

### 24 Text S1: Determining the number of H<sub>3</sub>O<sup>+</sup> ions

25 We extracted the underlying data from the publication<sup>1</sup> using WebPlotDigitizer and reconstructed  
26 the figures from the extracted datapoints (Figure S2). The relationship between diameter and droplet  
27 charge was described by fitting a power trendline of the form of:

28

$$29 \quad y = ax^b \quad (\text{eq. S1})$$

30

31 In place of diameter, we used the body diagonal of the 64 nm<sup>3</sup> cube, calculated from:

32

$$33 \quad D = \sqrt{3}a \quad (\text{eq. S2})$$

34

35 which was determined to be 6.9 nm. The number of calculated H<sub>3</sub>O<sup>+</sup> molecules in a droplet with a  
36 diameter of 6.9 nm was calculated to be 149 in a water droplet and 108 in a methanol droplet. Using  
37 the average of these two values we estimated 129 H<sub>3</sub>O<sup>+</sup> molecules for our system. In order to verify  
38 whether this number is in agreement with other experimental observations and with electrochemical  
39 theory, we applied the Nernst equation to calculate the output voltage of a 64 nm<sup>3</sup> droplet with 129  
40 H<sub>3</sub>O<sup>+</sup> molecules and compared that to the observations of Maze et al.<sup>2</sup> For an electrochemical cell with  
41 water, where the following reactions take place:

42

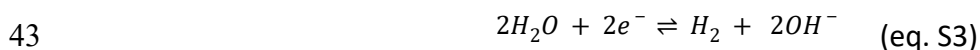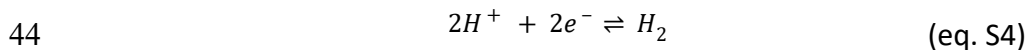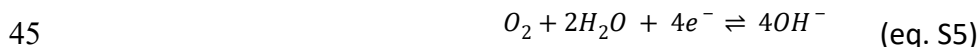

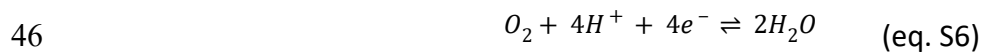

47

48 the Nernst equation<sup>3,4</sup> for the half-reaction eq. S4 is as follows:

49

50 
$$E = E^0 - \frac{0.059}{2} \log \frac{p(H_2)}{[H^+]^2}$$
 (eq. S7)

51

52 where, E is the cell potential (in our case the droplet potential), E<sup>0</sup> is the standard reduction potential,

53 p is the pressure of the system.

54

55 For eq. S7, E<sup>0</sup> = 0,<sup>3</sup> and for our experiment, p = 1 atm, hence, eq. S7 can be written as

56

57 
$$E = - \frac{0.059}{2} \log \frac{1}{[H^+]^2}$$
 (eq. S8)

58

59 Converting the number of 129 H<sup>+</sup> in 64 nm<sup>3</sup> to concentration we get 2 x 10<sup>24</sup> H<sup>+</sup>/L, which when

60 converted to mol/L using Avogadro's number equals to 3.35 mol/L. Solving E in eq. S8 for [H<sup>+</sup>] 3.35

61 mol/L gives E = 0.031 V. Maze et al.<sup>2</sup> observed an output voltage of 0.5 V for a droplet with 4 μm

62 diameter. Considering that our system is substantially smaller and given that Smith et al.<sup>1</sup> observed a

63 decrease in charge with decreasing diameter, we concluded that our estimated number of 129 H<sub>3</sub>O<sup>+</sup> is

64 within a reasonable range.

65

66 **Text S2: Determining the number of H<sup>+</sup> ions**

67 One of the challenges we faced during the simulations was that when using a small number of H<sup>+</sup>  
68 ions (e.g., 30), the ions moved towards the edges of the water droplet and did not sufficiently interact  
69 with the analyte that often remained in the center of the box (Figure S3 and S4). This may be hard to  
70 see in a 2D representation (Figure S3 and S4) but it can be clearly seen in the calculations of the  
71 Coulomb and Lennard-Jones interactions (Figure S5).

72

73 Both System 1 and System 2 were neutralized with the addition of OH<sup>-</sup> ions equal to the number of  
74 H<sub>3</sub>O<sup>+</sup> for System 1 and to the number of H<sup>+</sup> for System 2. It should be noted that although, OH<sup>-</sup> are not  
75 expected to be at such high concentrations in ESI+, neutralizing the system is necessary in order to  
76 conduct the simulations. Not neutralizing the system results in an unstable system that crashes before  
77 the simulation is completed. It should be clarified that although OH<sup>-</sup> ions were added to the system,  
78 their interactions with the analyte were not included in the model for predicting RRF. It should also be  
79 noted that the addition of OH<sup>-</sup> ions does not influence the interactions of the analyte with the water,  
80 methanol, H<sub>3</sub>O<sup>+</sup> and H<sup>+</sup> molecules. The interactions between the analyte and each group of molecules  
81 (e.g., water) are not dependent upon the interactions of the analyte and another group of molecules  
82 (e.g., OH<sup>-</sup>).

83

84

85

86

87

88

89

90

91 **SUPPLEMENTARY FIGURES**

92

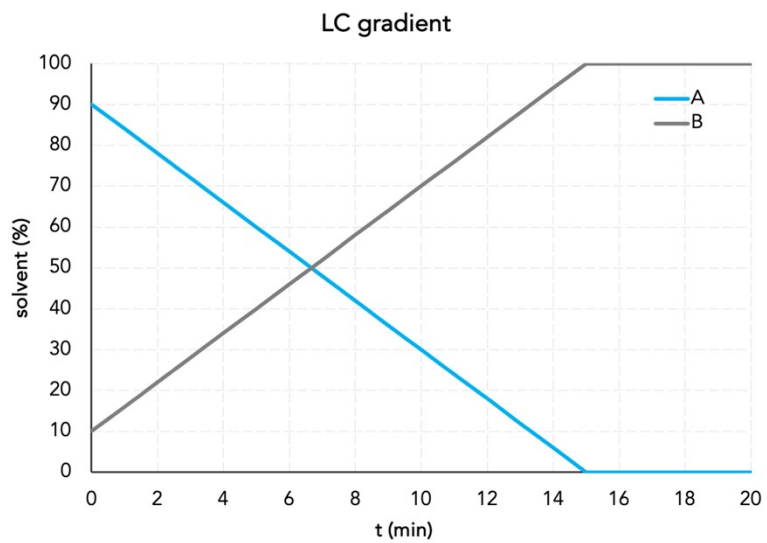

93

94

95 Figure S1: Liquid chromatography gradient showing the percentages of solvent A and B over time. A:

96 HPLC water with 0.1% methanol and 5 mM ammonium acetate. B: methanol with 10% HPLC water and

97 5 mM ammonium acetate.

98

99

100

101

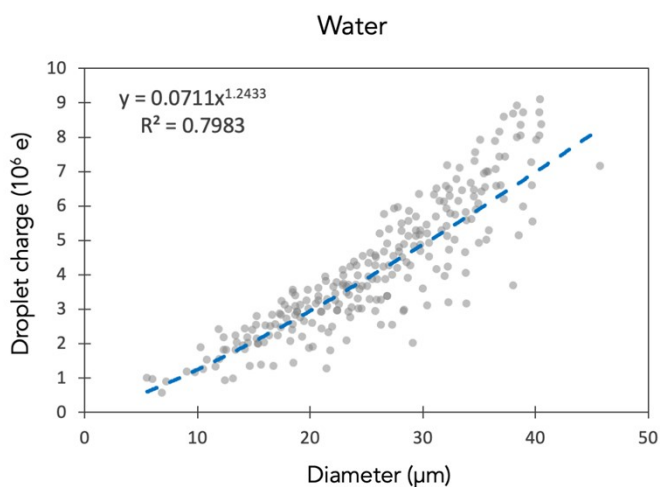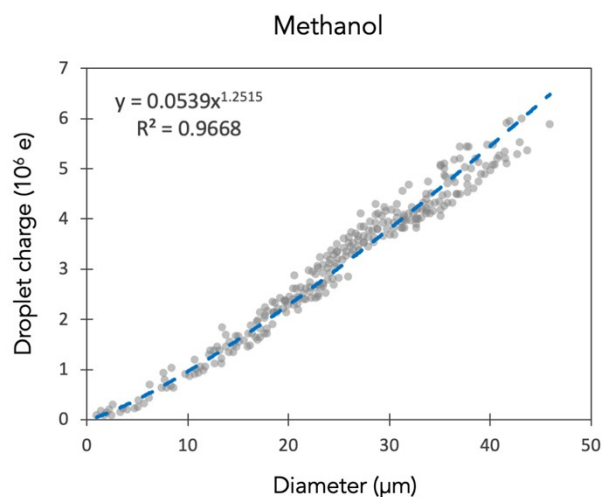

102

103 Figure S2: Reconstructed figures from the publication of Smith et al.<sup>1</sup> showing the relationship between  
 104 charge and droplet diameter for electrospray droplets created in positive electrospray ionization for  
 105 water and methanol. The trendline is shown in red. The number of calculated  $\text{H}_3\text{O}^+$  molecules in a  
 106 droplet with a diameter of 6.9 nm was calculated to be 149 in a water droplet and 108 in a methanol  
 107 droplet.

108

109

110

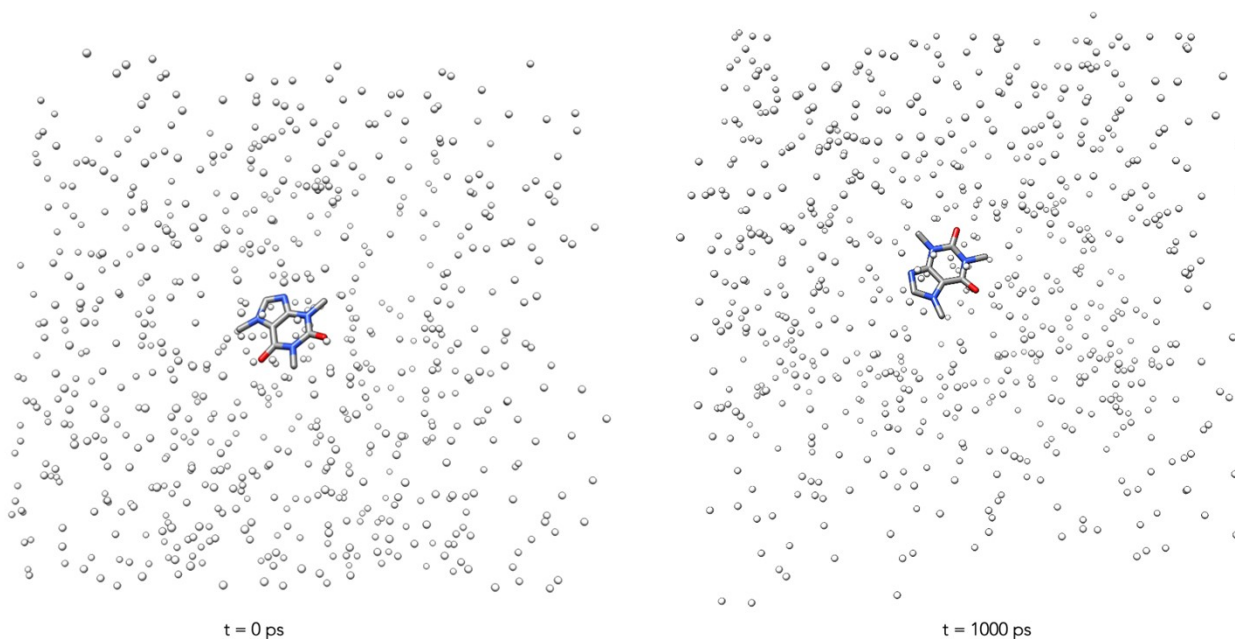

111

112 Figure S3: Caffeine in a solvent box among  $H^+$  ions at  $t = 0$  ps and at  $t = 1000$  ps. The box contained 1  
 113 molecule of caffeine, 625 water molecules, 699  $OH^-$  ions and 699  $H^+$  ions. The figure shows only the  
 114 caffeine molecule and the  $H^+$  ions for simplicity.

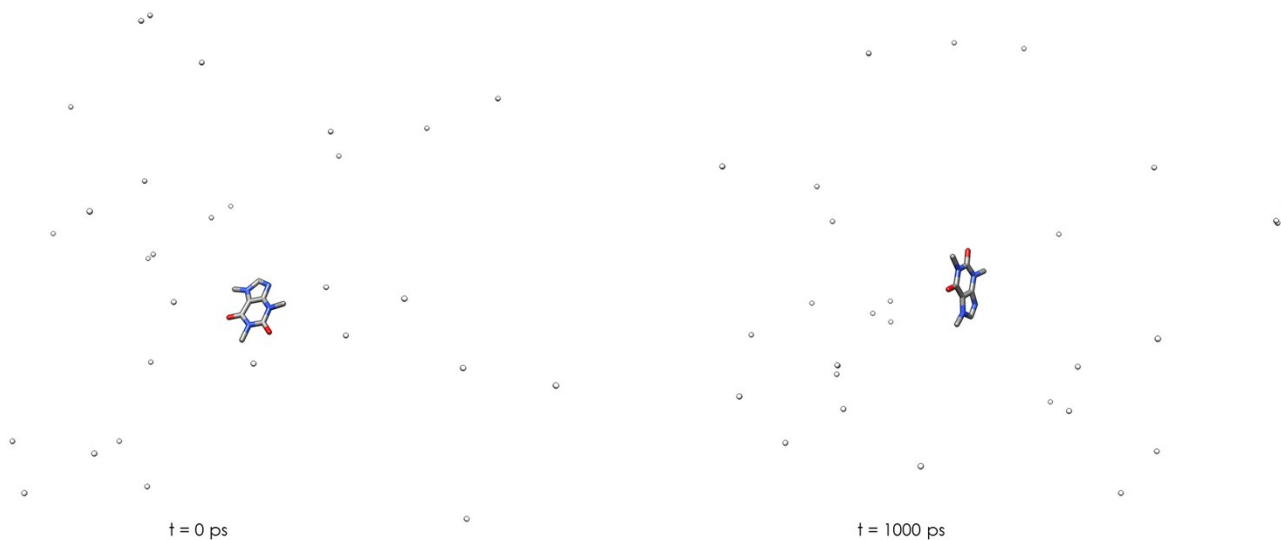

115

116 Figure S4: Caffeine in a solvent box with  $H^+$  ions at  $t = 0$  ps and at  $t = 1000$  ps. The box contains 1  
117 molecule of caffeine, 30  $H^+$  ions, 2084 water molecules and 30  $OH^-$  ions. The figure shows only the  
118 caffeine molecule and the  $H^+$  ions for simplicity.  
119

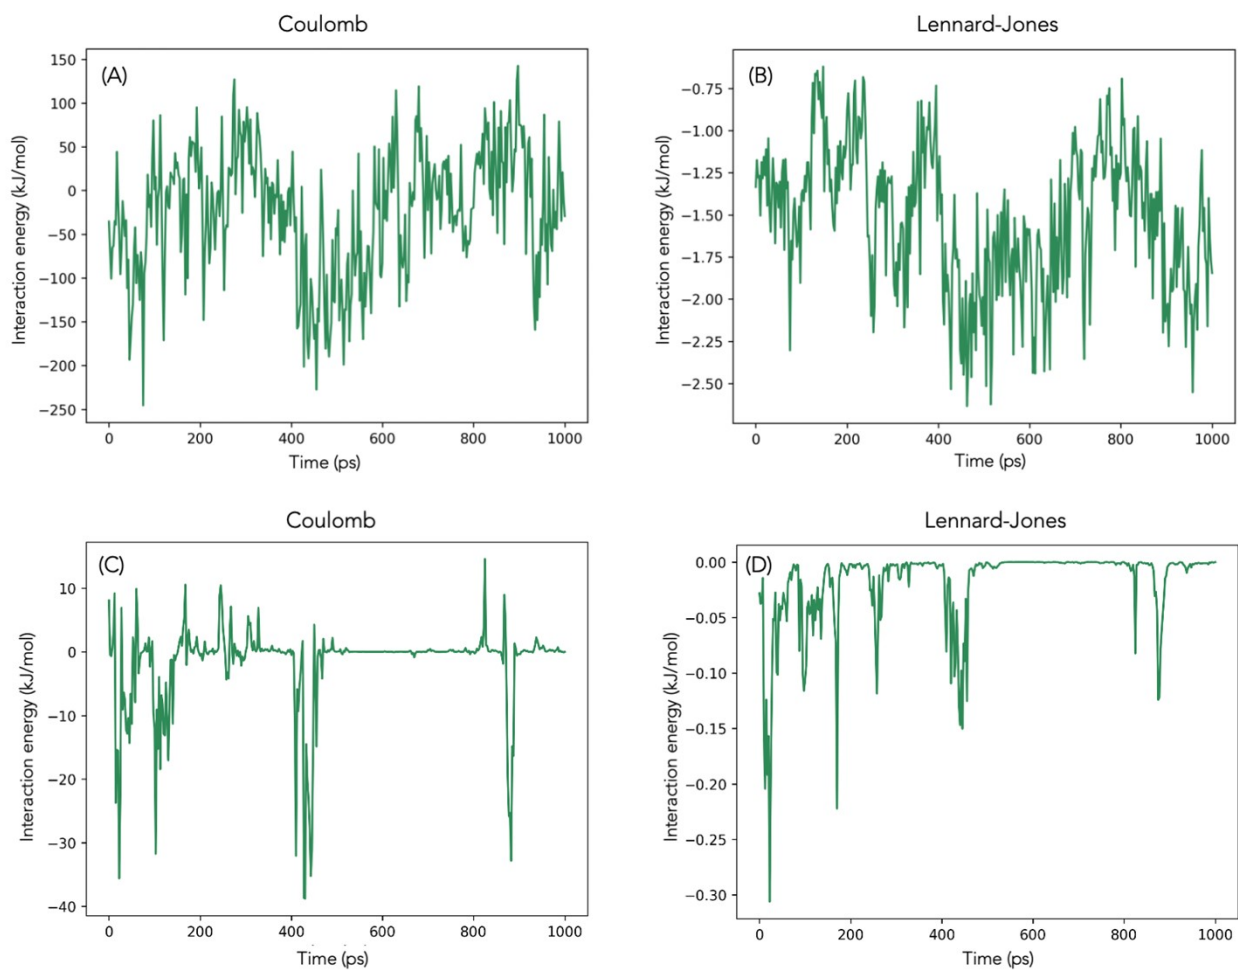

120  
121 Figure S5: Coulomb and Lennard-Jones interactions between caffeine and  $H^+$  ions during the  
122 simulation. The top figures (A and B) show the Coulomb and Lennard-Jones interactions over time for a  
123 system with 699  $H^+$  ions and the bottom figures show the interaction energies for a system with 30  $H^+$   
124 ions.  
125



126

127

128

129

130

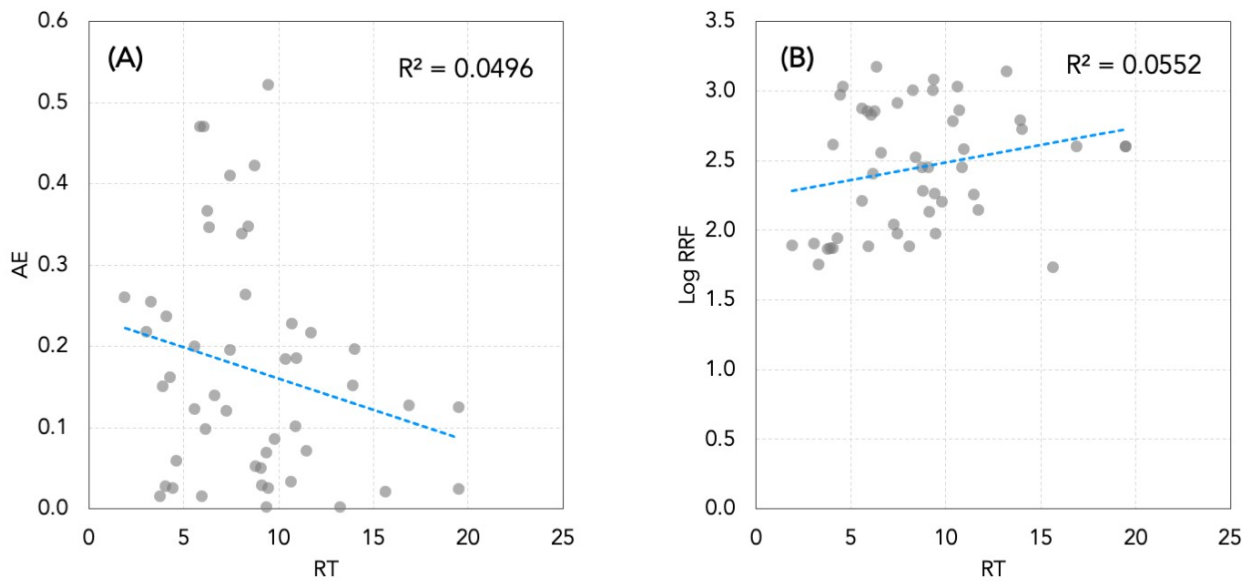

131

Fig

132 ure S6: A: Relationship between the absolute errors (AE) of the model and retention time (RT). B:

133 Relationship between RT and RRF.

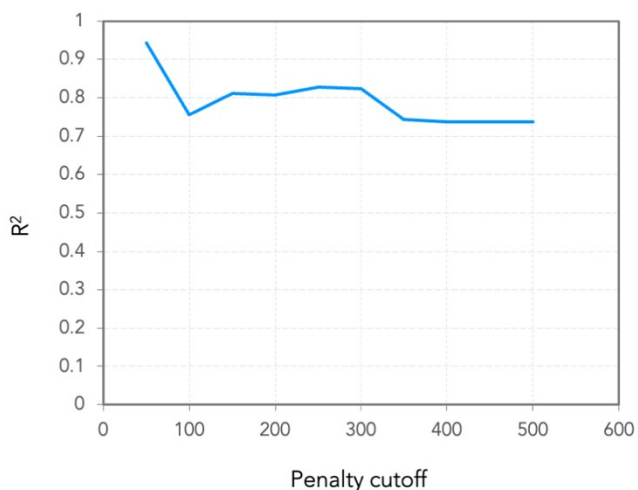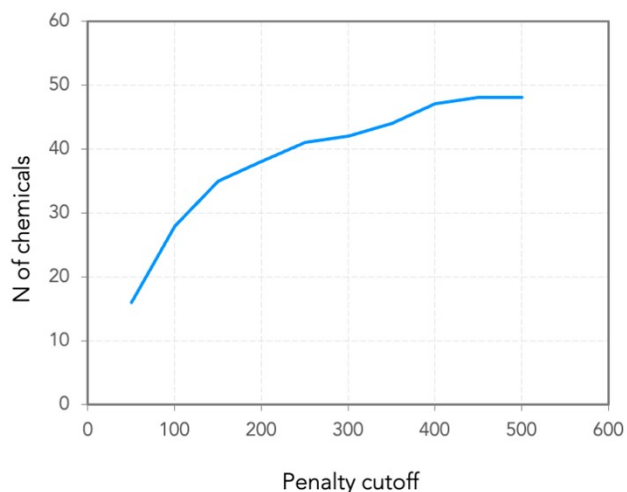

134

135 Figure S7:  $R^2$  of the model and number of chemicals as a function of the penalty cutoff point for  
 136 including chemicals in the dataset. As the penalty cutoff point decreases so does the number of  
 137 chemicals included in the model. The  $R^2$  of the model appears to be consistent with an increase around  
 138 300. At cutoff point 50 the model shows a high  $R^2$  as a result of overparameterization given the small  
 139 number of chemicals remaining in at this cutoff point ( $n=16$ ).

140

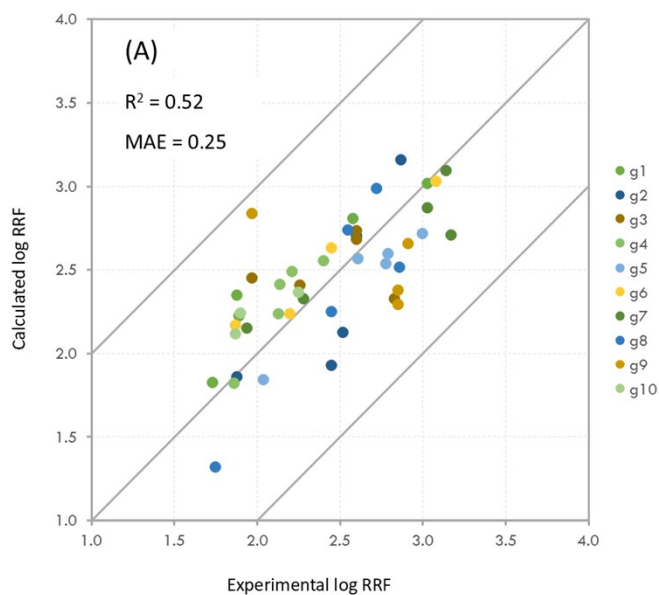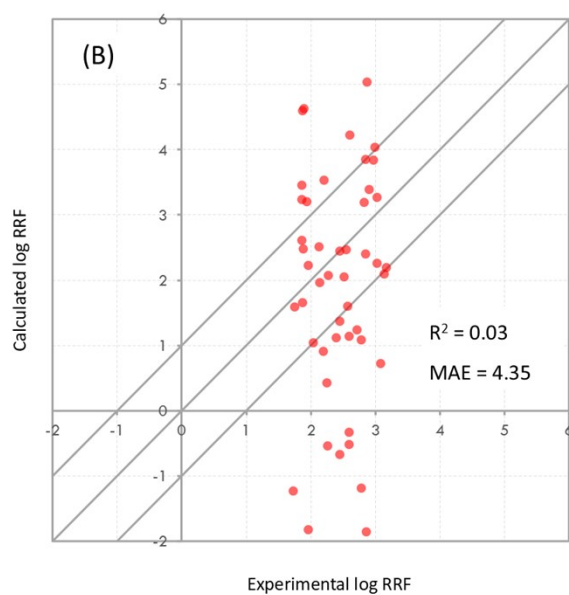

141

142

143 Figure S8: (A) 10-fold cross-validation showing the individual groups of compounds for each fold. The  
144 figure shows the results for each group of compounds when these compounds were not included in  
145 the training set. (B) Y-randomization for all the compounds in the dataset.  $R^2$  is the coefficient of  
146 determination and MAE is the mean absolute error between the predictions and the experimental  
147 values.

148

149

150

151

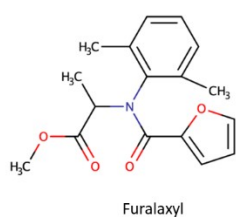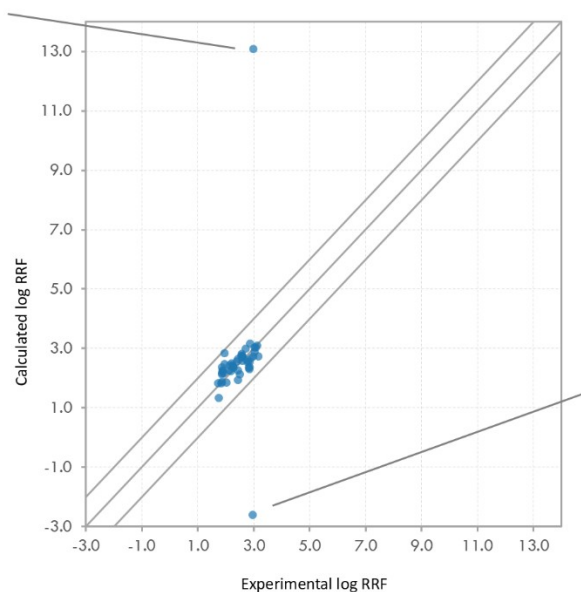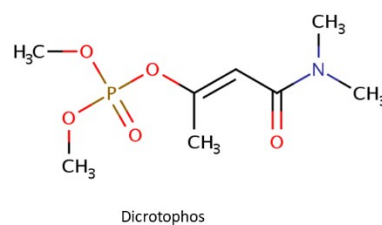

152

153

154 Figure S9: 10-fold cross-validation showing the results for the testing sets including the two outliers  
155 that were excluded for being outside the applicability domain of the models that were used to predict  
156 their log RRF. The figure shows the results for each group of compounds when these compounds were  
157 not included in the training set.

158

159

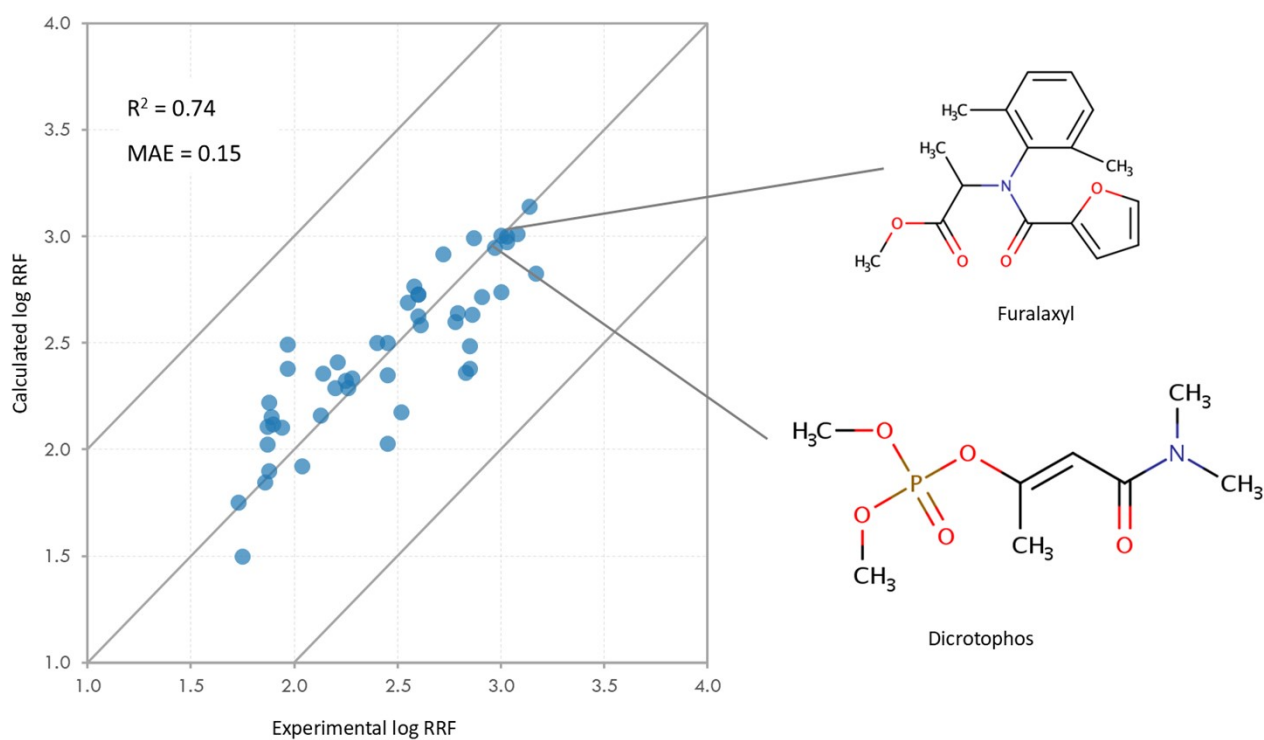

160

161

162 Figure: S10: Experimental and predicted values of log transformed RRF. The diagonal lines show the 1-

163 to-1 agreement line, and the  $\pm 1$  log unit deviation line. The figure shows the results of the model

164 including all the chemicals in the dataset and pointing the results for Furalaxyl and N,N-

165 Dibutylthiourea.

166

167

168

169

170

171

172

173

174

175 **SUPPLEMENTARY TABLES**

176 Table S1: Statistics for the multi-parameter linear regression model that contained all compounds in

177 the dataset

| All compounds      |             |                |        |         |        |        |
|--------------------|-------------|----------------|--------|---------|--------|--------|
| R <sup>2</sup>     | 0.74        |                |        |         |        |        |
|                    | coefficient | standard error | t      | p-value | [0.025 | 0.975] |
| const              | 2.51        | 0.278          | 9.049  | 0.000   | 1.95   | 3.078  |
| L <sub>p1</sub>    | 0.53        | 0.328          | 1.607  | 0.117   | -0.139 | 1.193  |
| L <sub>p2</sub>    | -6.04       | 1.509          | -4.001 | 0.000   | -9.101 | -2.974 |
| L <sub>p3</sub>    | 5.24        | 1.407          | 3.725  | 0.001   | 2.384  | 8.096  |
| L <sub>std</sub>   | 3.47        | 0.883          | 3.934  | 0.000   | 1.681  | 5.267  |
| Cou <sub>p1</sub>  | -0.01       | 0.002          | -3.421 | 0.002   | -0.009 | -0.002 |
| Cou <sub>p2</sub>  | 0.02        | 0.01           | 2.195  | 0.035   | 0.002  | 0.043  |
| Cou <sub>p3</sub>  | -0.02       | 0.01           | -1.705 | 0.097   | -0.036 | 0.003  |
| Cou <sub>std</sub> | -0.03       | 0.007          | -4.995 | 0.000   | -0.048 | -0.02  |
| W L <sub>p2</sub>  | 0.18        | 0.054          | 3.318  | 0.002   | 0.07   | 0.289  |
| W L <sub>p3</sub>  | -0.17       | 0.055          | -3.145 | 0.003   | -0.284 | -0.061 |
| W L <sub>std</sub> | 0.31        | 0.082          | 3.761  | 0.001   | 0.143  | 0.477  |
| S <sub>w</sub>     | 0.11        | 0.071          | 1.6    | 0.119   | -0.031 | 0.258  |

178

179 Table S2: Statistics for the multi-parameter linear regression model that contained compounds with a

180 penalty less than 300

| Compounds with penalties less than 300 |             |                |        |         |        |        |
|----------------------------------------|-------------|----------------|--------|---------|--------|--------|
| R <sup>2</sup>                         | 0.82        |                |        |         |        |        |
|                                        | coefficient | standard error | t      | p-value | [0.025 | 0.975] |
| const                                  | 2.51        | 0.262          | 9.607  | 0.000   | 1.979  | 3.049  |
| L <sub>p1</sub>                        | 0.63        | 0.288          | 2.204  | 0.036   | 0.046  | 1.222  |
| L <sub>p2</sub>                        | -5.80       | 1.317          | -4.406 | 0.000   | -8.497 | -3.109 |
| L <sub>p3</sub>                        | 4.92        | 1.222          | 4.027  | 0.000   | 2.421  | 7.419  |
| L <sub>std</sub>                       | 3.49        | 0.773          | 4.52   | 0.000   | 1.912  | 5.074  |
| Cou <sub>p1</sub>                      | -0.01       | 0.001          | -4.072 | 0.000   | -0.009 | -0.003 |
| Cou <sub>p2</sub>                      | 0.03        | 0.009          | 3.336  | 0.002   | 0.012  | 0.051  |
| Cou <sub>p3</sub>                      | -0.03       | 0.009          | -2.779 | 0.009   | -0.045 | -0.007 |

|                     |       |       |        |       |        |        |
|---------------------|-------|-------|--------|-------|--------|--------|
| Coul <sub>std</sub> | -0.04 | 0.006 | -6.235 | 0.000 | -0.05  | -0.025 |
| W L <sub>p2</sub>   | 0.21  | 0.052 | 4.025  | 0.000 | 0.103  | 0.317  |
| W L <sub>p3</sub>   | -0.20 | 0.052 | -3.843 | 0.001 | -0.307 | -0.094 |
| W L <sub>std</sub>  | 0.35  | 0.08  | 4.45   | 0.000 | 0.192  | 0.518  |
| S <sub>w</sub>      | 0.14  | 0.063 | 2.163  | 0.039 | 0.007  | 0.265  |

181

## 182 REFERENCES

- 183 (1) Smith, J. N.; Flagan, R. C.; Beauchamp, J. L. Droplet Evaporation and Discharge Dynamics in  
184 Electro spray Ionization. *J. Phys. Chem. A* **2002**, *106* (42), 9957–9967.  
185 <https://doi.org/10.1021/jp025723e>.
- 186 (2) Maze, J. T.; Jones, T. C.; Jarrold, M. F. Negative Droplets from Positive Electro spray. *J. Phys. Chem. A*  
187 **2006**, *110* (46), 12607–12612. <https://doi.org/10.1021/jp064581b>.
- 188 (3) *IUPAC - Non-standard reduction potentials*.  
189 <https://old.iupac.org/didac/Didac%20Eng/Didac03/Content/R10.htm> (accessed 2024-05-23).
- 190 (4) Zoski, C. G. *Handbook of Electrochemistry*; Elsevier Science, 2007.

191

192
